# Supplementary material
Source: publisher figshare collection journal article supplement (https://gsajournals.figshare.com/articles/dataset/_/12246134)
Supplement: Supplementary file 1 [file 1]

# Multiple QTL mapping in autopolyploids: a random-effect model approach with application in a hexaploid sweetpotato full-sib population

Guilherme da Silva Pereira<sup>\*,†,1,2</sup>, Dorcus C. Gemenet<sup>§,1</sup>, Marcelo Mollinari<sup>\*,†</sup>, Bode A. Olukolu<sup>‡</sup>, Joshua C. Wood<sup>\*\*</sup>, Federico Diaz<sup>++</sup>, Veronica Mosquera<sup>++</sup>, Wolfgang J. Gruneberg<sup>++</sup>, Awais Khan<sup>§§</sup>, C. Robin Buell<sup>\*\*</sup>, G. Craig Yencho<sup>†</sup> and Zhao-Bang Zeng<sup>\*,†</sup>

<sup>\*</sup>Bioinformatics Research Center, North Carolina State University, Raleigh NC 27695, USA, <sup>†</sup>Department of Horticultural Science, North Carolina State University, Raleigh NC 27695, USA, <sup>§</sup>International Potato Center, ILRI Campus, Nairobi 25171-00603, Kenya, <sup>‡</sup>Department of Entomology and Plant Pathology, University of Tennessee, Knoxville TN 37996, USA, <sup>\*\*</sup>Department of Plant Biology, Michigan State University, East Lansing, MI 48824, USA, <sup>++</sup>International Potato Center, Lima 1558, Peru, <sup>§§</sup>Plant Pathology and Plant-Microbe Biology Section, Cornell University, Geneva NY 14456, USA

---

## Supplemental Figures

---

---

<sup>1</sup>These authors contributed equally to this work.

<sup>2</sup>Corresponding author: North Carolina State University, 1 Lampe Dr, Raleigh, NC 27695-7566. E-mail: gdasilv@ncsu.edu

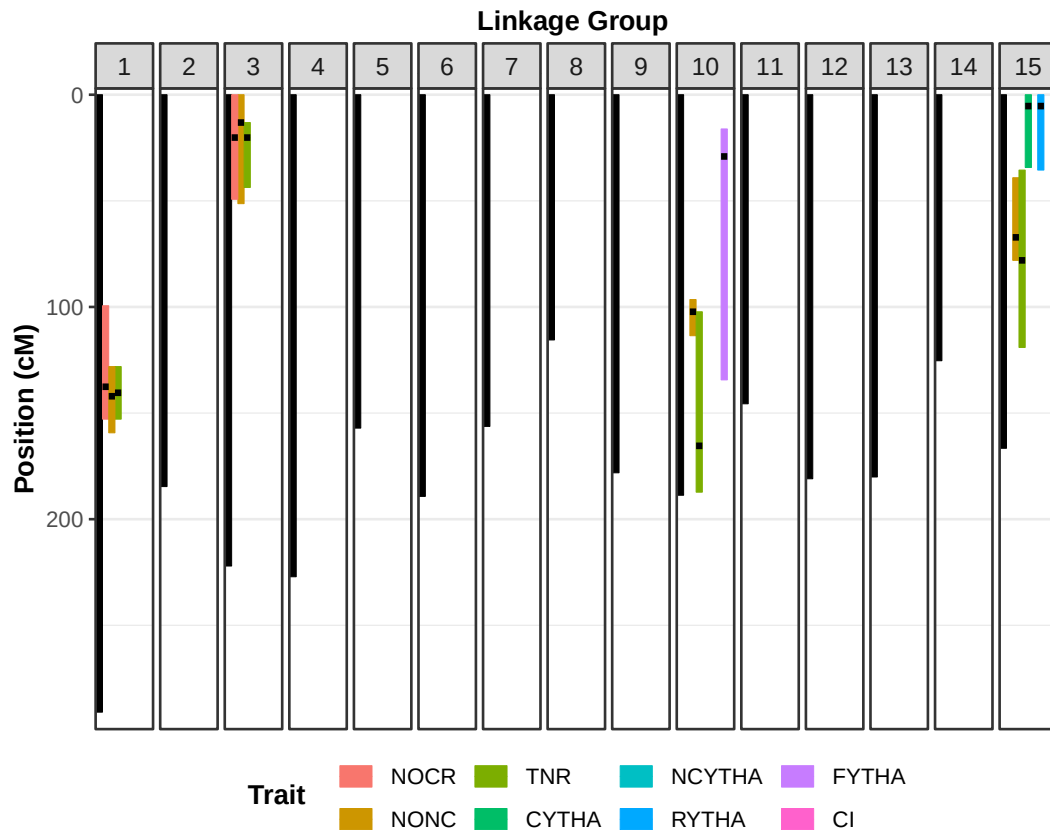

**Figure S1** QTL support intervals from random-effect multiple interval mapping (REMIM) of yield-related traits from ‘Beauregard’ × ‘Tanzania’ (BT) full-sib family. Black dots represent the QTL peaks, and colored bars represent the ~95% support interval computed as  $LOP - 1.5$ . Trait abbreviations: number of commercial (NOCR), noncommercial (NONC) and total (TNR) roots per plant, commercial (CYTHA), noncommercial (NCYTHA) and total (RYTHA) root yield in  $t \cdot ha^{-1}$ , foliage yield (FYTHA) in  $t \cdot ha^{-1}$ , and commercial index (CI).

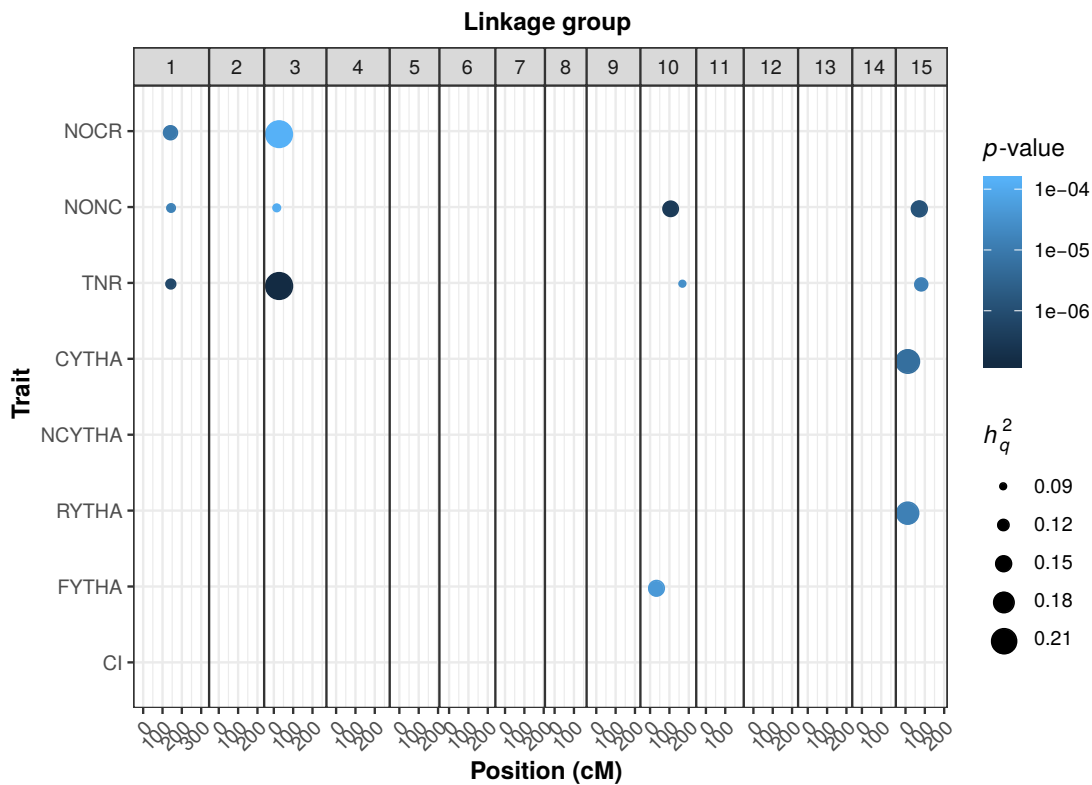

**Figure S2** Score-based  $p$ -values and QTL heritabilities ( $h_q^2$ ) from random-effect multiple interval mapping (REMIM) of eight yield-related traits from ‘Beauregard’  $\times$  ‘Tanzania’ (BT) full-sib family. Dots are positioned relative to the QTL peaks: color gradient represents the  $p$ -values, while sizes are proportional to heritabilities of mapped QTL. Trait abbreviations: number of commercial (NOCR), noncommercial (NONC) and total (TNR) roots per plant, commercial (CYTHA), noncommercial (NCYTHA) and total (RYTHA) root yield in  $\text{t} \cdot \text{ha}^{-1}$ , foliage yield (FYTHA) in  $\text{t} \cdot \text{ha}^{-1}$ , and commercial index (CI).

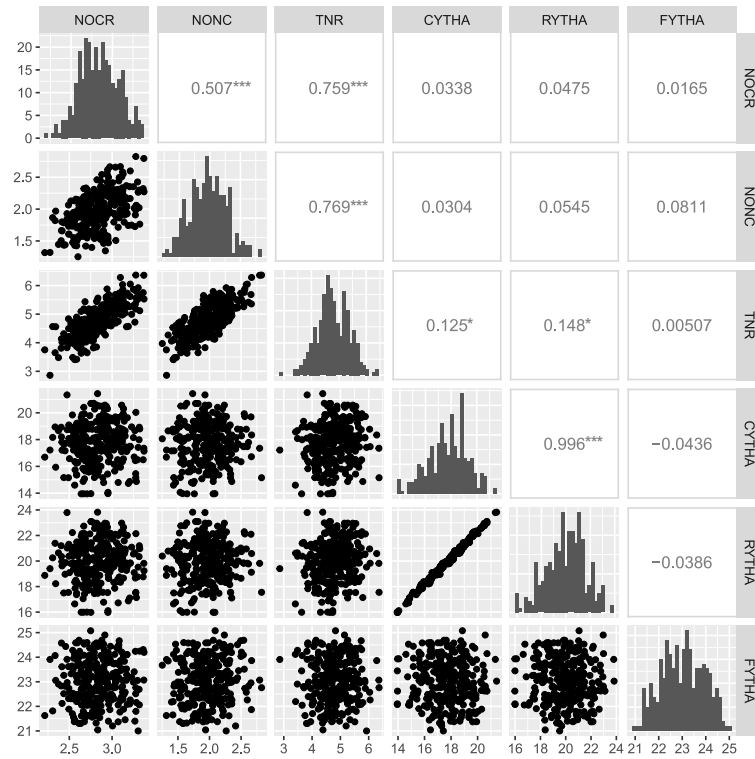

**Figure S3** Pearson's correlations ( $*p < 0.05$ ,  $***p < 0.001$ ) among QTL-based breeding values for eight yield-related traits from 'Beauregard'  $\times$  'Tanzania' (BT) full-sib family. Trait abbreviations: number of commercial (NOCR), noncommercial (NONC) and total (TNR) roots per plant, commercial (CYTHA), noncommercial (NCYTHA) and total (RYTHA) root yield in  $\text{t} \cdot \text{ha}^{-1}$ , foliage yield (FYTHA) in  $\text{t} \cdot \text{ha}^{-1}$ , and commercial index (CI).

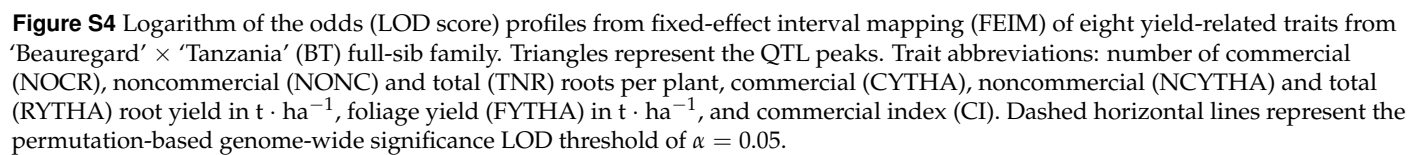

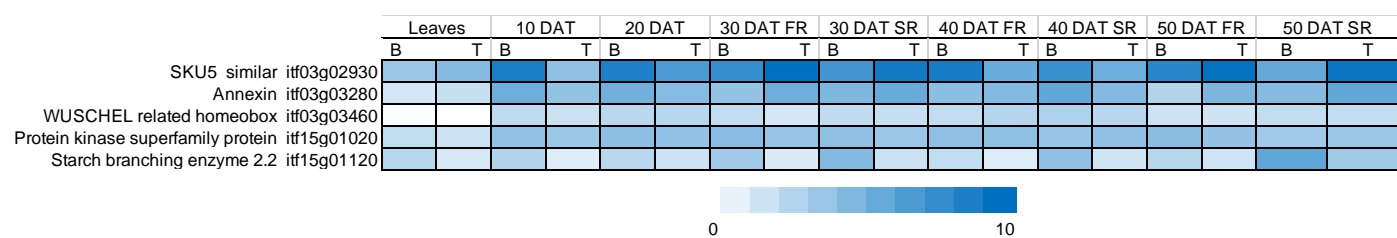

**Figure S5** Heatmap with expression abundances in fragments per kilobase exon model per million mapped reads (FPKM,  $\log_2$ -transformed) for five genes in leaves and roots of 'Beauregard' (B) and 'Tanzania' (T). DAT: days after transplanting. SR: storage roots. FR: fibrous roots.
