# Supplementary material
Source: publisher figshare collection journal article supplement (https://gsajournals.figshare.com/articles/dataset/_/12246134)
Supplement: Supplementary file 1 [file 1]

## Sheet: mapa_gui
SNP name	Linkage Group	Map position	Position in	Position in	REF	ALT	Dose of ALT allele	Dose of ALT allele	Homologs in Beauregard							Homologs in Tanzania
			I. trifida genome	I. triloba genome			in Beauregard	in Tanzania	0 = REF; 1 = ALT
									a	b	c	d	e	f		g	h	i	j	k	l
Tf_Tl_S1_29275_S1_1326265	1	0	29275	1326265	C	G	1	3	1	0	0	0	0	0		1	1	1	0	0	0
Tf_Tl_S1_29296_S1_1326286	1	0	29296	1326286	T	C	1	2	1	0	0	0	0	0		0	1	1	0	0	0
Tf_Tl_S1_29301_S1_1326291	1	0	29301	1326291	C	G	1	2	1	0	0	0	0	0		0	1	1	0	0	0
Tf_Tl_S1_29317_S1_1326307	1	0	29317	1326307	T	A	1	0	0	1	0	0	0	0		0	0	0	0	0	0
Tf_S1_31599	1	0	31599	NA	G	A	1	0	0	0	1	0	0	0		0	0	0	0	0	0
Tf_S1_31626	1	0	31626	NA	C	T	1	0	0	0	1	0	0	0		0	0	0	0	0	0
Tf_S1_31641	1	0	31641	NA	A	G	1	0	0	0	1	0	0	0		0	0	0	0	0	0
Tf_Tl_S1_57849_S1_22992	1	2	57849	22992	C	T	1	1	0	0	0	1	0	0		0	0	0	1	0	0
Tf_Tl_S1_76909_S1_42514	1	2	76909	42514	T	C	1	0	1	0	0	0	0	0		0	0	0	0	0	0
Tf_Tl_S1_144588_S1_113774	1	2.3	144588	113774	T	G	2	1	1	0	0	1	0	0		0	0	0	1	0	0
Tf_Tl_S1_148435_S1_117626	1	2.3	148435	117626	A	-	2	1	1	0	0	1	0	0		0	0	0	1	0	0
Tf_Tl_S1_148436_S1_117627	1	2.3	148436	117627	-	G	2	1	1	0	0	1	0	0		0	0	0	1	0	0
Tf_Tl_S1_148440_S1_117631	1	2.3	148440	117631	G	T	2	1	1	0	0	1	0	0		0	0	0	1	0	0
Tf_Tl_S1_154633_S1_123818	1	2.3	154633	123818	-	G	0	1	0	0	0	0	0	0		0	1	0	0	0	0
Tf_Tl_S1_154686_S1_123871	1	2.3	154686	123871	T	-	0	1	0	0	0	0	0	0		0	1	0	0	0	0
Tl_S1_163983	1	2.3	NA	163983	C	T	1	1	0	0	0	1	0	0		0	0	0	1	0	0
Tf_S1_171913	1	2.3	171913	NA	C	T	1	1	0	0	0	1	0	0		0	0	0	1	0	0
Tf_Tl_S1_189184_S1_186883	1	2.4	189184	186883	C	T	1	4	0	0	1	0	0	0		1	1	1	0	1	0
Tf_Tl_S1_189185_S1_186884	1	2.4	189185	186884	G	A	3	1	0	1	0	0	1	1		0	0	0	0	0	1
Tf_Tl_S1_189193_S1_186892	1	2.4	189193	186892	G	A	2	1	1	0	0	1	0	0		0	0	0	1	0	0
Tf_Tl_S1_189208_S1_186907	1	2.4	189208	186907	A	C	1	4	0	0	1	0	0	0		1	1	1	0	1	0
Tf_Tl_S1_189209_S1_186908	1	2.5	189209	186908	G	A	1	3	0	0	1	0	0	0		1	0	1	0	1	0
Tf_Tl_S1_189607_S1_187305	1	2.5	189607	187305	G	A	0	1	0	0	0	0	0	0		0	1	0	0	0	0
Tf_Tl_S1_216273_S1_214590	1	2.7	216273	214590	A	T	1	1	0	0	0	1	0	0		0	0	0	1	0	0
Tf_Tl_S1_216286_S1_214603	1	2.8	216286	214603	G	T	1	0	0	1	0	0	0	0		0	0	0	0	0	0
Tl_S1_217154	1	2.8	NA	217154	-	A	2	3	1	0	0	1	0	0		1	1	0	1	0	0
Tl_S1_217155	1	2.8	NA	217155	-	G	2	3	1	0	0	1	0	0		1	1	0	1	0	0
Tf_Tl_S1_218917_S1_217170	1	2.8	218917	217170	G	-	2	3	1	0	0	1	0	0		1	1	0	1	0	0
Tf_Tl_S1_232014_S1_229641	1	3.5	232014	229641	T	C	0	1	0	0	0	0	0	0		0	1	0	0	0	0
Tf_S1_254883	1	3.6	254883	NA	A	C	0	1	0	0	0	0	0	0		1	0	0	0	0	0
Tf_S1_272490	1	3.6	272490	NA	C	A	0	1	0	0	0	0	0	0		1	0	0	0	0	0
Tf_S1_272498	1	3.6	272498	NA	G	T	0	1	0	0	0	0	0	0		1	0	0	0	0	0
Tf_Tl_S1_309835_S1_301761	1	3.6	309835	301761	T	G	1	0	0	1	0	0	0	0		0	0	0	0	0	0
Tl_S1_315791	1	3.6	NA	315791	C	-	0	1	0	0	0	0	0	0		1	0	0	0	0	0
Tf_S1_501374	1	3.7	501374	NA	C	A	0	1	0	0	0	0	0	0		1	0	0	0	0	0
Tf_S1_519686	1	3.7	519686	NA	T	A	4	1	1	1	1	1	0	0		0	0	0	1	0	0
Tl_S1_315819	1	3.7	NA	315819	C	T	1	0	1	0	0	0	0	0		0	0	0	0	0	0
Tl_S1_338295	1	3.7	NA	338295	A	-	1	0	0	1	0	0	0	0		0	0	0	0	0	0
Tl_S1_338298	1	3.7	NA	338298	T	-	1	0	0	1	0	0	0	0		0	0	0	0	0	0
Tl_S1_338300	1	3.7	NA	338300	A	-	1	0	0	1	0	0	0	0		0	0	0	0	0	0
Tl_S1_402869	1	3.9	NA	402869	A	T	4	1	1	1	1	1	0	0		0	0	0	1	0	0
Tf_Tl_S1_532433_S1_415978	1	3.9	532433	415978	C	T	0	1	0	0	0	0	0	0		0	1	0	0	0	0
Tf_S1_532479	1	3.9	532479	NA	A	G	1	1	1	0	0	0	0	0		1	0	0	0	0	0
Tl_S1_416024	1	3.9	NA	416024	A	G	1	1	1	0	0	0	0	0		1	0	0	0	0	0
Tf_Tl_S1_532530_S1_416075	1	3.9	532530	416075	G	A	0	1	0	0	0	0	0	0		0	1	0	0	0	0
Tl_S1_423514	1	3.9	NA	423514	A	G	0	1	0	0	0	0	0	0		1	0	0	0	0	0
Tf_S1_533901	1	3.9	533901	NA	G	C	1	0	1	0	0	0	0	0		0	0	0	0	0	0
Tf_S1_533928	1	3.9	533928	NA	-	A	1	0	1	0	0	0	0	0		0	0	0	0	0	0
Tf_Tl_S1_542061_S1_426162	1	3.9	542061	426162	G	A	0	1	0	0	0	0	0	0		1	0	0	0	0	0
Tf_Tl_S1_542144_S1_426245	1	3.9	542144	426245	G	A	3	1	1	0	0	0	1	1		0	0	0	0	0	1
Tf_S1_553096	1	3.9	553096	NA	G	A	0	1	0	0	0	0	0	0		1	0	0	0	0	0
Tf_S1_553099	1	3.9	553099	NA	G	A	0	1	0	0	0	0	0	0		0	1	0	0	0	0
Tf_S1_555819	1	3.9	555819	NA	C	G	0	1	0	0	0	0	0	0		1	0	0	0	0	0
Tl_S1_444426	1	3.9	NA	444426	C	G	0	1	0	0	0	0	0	0		1	0	0	0	0	0
Tf_Tl_S1_565657_S1_455326	1	4	565657	455326	C	G	1	1	0	0	0	1	0	0		0	0	0	1	0	0
Tf_Tl_S1_565661_S1_455330	1	4.3	565661	455330	G	A	0	1	0	0	0	0	0	0		1	0	0	0	0	0
Tf_Tl_S1_566390_S1_456059	1	4.3	566390	456059	C	T	0	2	0	0	0	0	0	0		1	1	0	0	0	0
Tf_Tl_S1_655638_S1_531342	1	4.3	655638	531342	G	A	0	1	0	0	0	0	0	0		1	0	0	0	0	0
Tf_Tl_S1_655663_S1_531367	1	4.8	655663	531367	A	G	0	2	0	0	0	0	0	0		0	0	1	0	1	0
Tf_Tl_S1_655692_S1_531396	1	4.8	655692	531396	G	A	2	3	1	0	0	1	0	0		0	0	1	1	1	0
Tf_Tl_S1_655693_S1_531397	1	4.8	655693	531397	G	A	2	3	1	0	0	1	0	0		0	0	1	1	1	0
Tf_Tl_S1_684364_S1_580963	1	5.1	684364	580963	T	A	2	1	1	0	0	1	0	0		0	0	0	1	0	0
Tf_Tl_S1_696515_S1_592939	1	5.1	696515	592939	G	A	2	1	0	0	0	0	1	1		0	0	0	0	0	1
Tf_Tl_S1_701149_S1_598508	1	5.1	701149	598508	A	C	0	1	0	0	0	0	0	0		1	0	0	0	0	0
Tf_Tl_S1_702693_S1_600762	1	5.1	702693	600762	G	T	0	2	0	0	0	0	0	0		0	0	1	0	1	0
Tf_Tl_S1_702710_S1_600779	1	5.1	702710	600779	C	T	1	0	1	0	0	0	0	0		0	0	0	0	0	0
Tf_Tl_S1_702714_S1_600783	1	5.1	702714	600783	C	A	4	2	0	1	1	0	1	1		0	1	0	0	0	1
Tf_Tl_S1_723760_S1_651990	1	5.1	723760	651990	G	T	2	1	1	0	0	1	0	0		0	0	0	1	0	0
Tf_Tl_S1_723770_S1_652000	1	5.1	723770	652000	A	G	4	1	1	1	1	1	0	0		0	0	0	1	0	0
Tf_Tl_S1_723776_S1_652006	1	5.2	723776	652006	G	A	2	1	1	0	0	1	0	0		0	0	0	1	0	0
Tf_Tl_S1_761197_S1_747201	1	5.2	761197	747201	C	T	0	2	0	0	0	0	0	0		0	0	1	0	1	0
Tf_Tl_S1_761199_S1_747203	1	5.2	761199	747203	T	C	0	2	0	0	0	0	0	0		0	0	1	0	1	0
Tf_Tl_S1_762228_S1_748237	1	5.2	762228	748237	A	G	0	2	0	0	0	0	0	0		1	1	0	0	0	0
Tf_Tl_S1_762233_S1_748242	1	5.2	762233	748242	C	A	0	2	0	0	0	0	0	0		1	1	0	0	0	0
Tf_Tl_S1_762263_S1_748272	1	5.4	762263	748272	A	G	2	0	0	1	1	0	0	0		0	0	0	0	0	0
Tl_S1_748308	1	5.4	NA	748308	G	T	2	2	0	1	1	0	0	0		1	1	0	0	0	0
Tl_S1_748349	1	5.4	NA	748349	A	G	0	2	0	0	0	0	0	0		1	1	0	0	0	0
Tf_S1_762299	1	5.4	762299	NA	G	T	2	2	0	1	1	0	0	0		1	1	0	0	0	0
Tf_S1_762340	1	5.4	762340	NA	A	G	0	2	0	0	0	0	0	0		1	1	0	0	0	0
Tf_S1_762346	1	5.4	762346	NA	G	-	0	2	0	0	0	0	0	0		1	1	0	0	0	0
Tl_S1_748355	1	5.4	NA	748355	G	-	0	2	0	0	0	0	0	0		1	1	0	0	0	0
Tl_S1_750560	1	5.8	NA	750560	C	T	0	1	0	0	0	0	0	0		1	0	0	0	0	0
Tl_S1_750614	1	5.8	NA	750614	A	G	0	2	0	0	0	0	0	0		0	0	1	0	1	0
Tl_S1_780435	1	5.8	NA	780435	C	T	0	1	0	0	0	0	0	0		1	0	0	0	0	0
Tf_S1_764781	1	5.8	764781	NA	C	T	0	1	0	0	0	0	0	0		1	0	0	0	0	0
Tf_S1_764835	1	5.8	764835	NA	A	G	0	2	0	0	0	0	0	0		0	0	1	0	1	0
Tl_S1_783334	1	5.9	NA	783334	T	G	0	2	0	0	0	0	0	0		0	0	1	0	1	0
Tf_S1_780333	1	5.9	780333	NA	T	G	0	2	0	0	0	0	0	0		0	0	1	0	1	0
Tf_Tl_S1_780377_S1_783378	1	5.9	780377	783378	C	T	0	1	0	0	0	0	0	0		1	0	0	0	0	0
Tf_S1_783211	1	5.9	783211	NA	A	G	1	0	1	0	0	0	0	0		0	0	0	0	0	0
Tf_Tl_S1_786894_S1_791861	1	5.9	786894	791861	A	T	2	3	1	0	0	1	0	0		0	0	1	1	1	0
Tf_Tl_S1_795186_S1_800633	1	5.9	795186	800633	C	A	2	0	0	1	1	0	0	0		0	0	0	0	0	0
Tl_S1_830413	1	5.9	NA	830413	A	G	2	1	1	0	0	1	0	0		0	0	0	1	0	0
Tf_S1_811507	1	5.9	811507	NA	A	G	2	1	1	0	0	1	0	0		0	0	0	1	0	0
Tf_Tl_S1_877582_S1_909741	1	6.6	877582	909741	C	T	0	2	0	0	0	0	0	0		0	0	1	0	1	0
Tf_Tl_S1_877615_S1_909774	1	6.6	877615	909774	T	G	2	0	0	1	1	0	0	0		0	0	0	0	0	0
Tf_Tl_S1_877623_S1_909782	1	6.7	877623	909782	A	T	1	0	1	0	0	0	0	0		0	0	0	0	0	0
Tf_Tl_S1_877627_S1_909786	1	6.7	877627	909786	A	C	1	0	1	0	0	0	0	0		0	0	0	0	0	0
Tf_Tl_S1_903718_S1_935186	1	6.7	903718	935186	G	A	2	0	0	1	1	0	0	0		0	0	0	0	0	0
Tf_S1_903721	1	6.7	903721	NA	C	T	2	1	1	0	0	1	0	0		0	0	0	1	0	0
Tl_S1_935189	1	6.7	NA	935189	C	T	2	1	1	0	0	1	0	0		0	0	0	1	0	0
Tf_S1_914134	1	6.7	914134	NA	-	T	2	0	0	1	1	0	0	0		0	0	0	0	0	0
Tf_S1_914135	1	6.7	914135	NA	A	-	2	0	0	1	1	0	0	0		0	0	0	0	0	0
Tf_Tl_S1_930899_S1_964098	1	7.5	930899	964098	G	C	1	0	0	1	0	0	0	0		0	0	0	0	0	0
Tf_Tl_S1_930904_S1_964103	1	7.5	930904	964103	T	C	1	0	0	1	0	0	0	0		0	0	0	0	0	0
Tf_Tl_S1_930947_S1_964146	1	7.5	930947	964146	C	T	0	3	0	0	0	0	0	0		0	1	1	0	1	0
Tf_Tl_S1_931379_S1_964578	1	7.5	931379	964578	T	C	4	1	0	1	1	0	1	1		0	0	0	0	0	1
Tf_Tl_S1_931409_S1_964608	1	7.5	931409	964608	C	T	1	0	1	0	0	0	0	0		0	0	0	0	0	0
Tl_S1_974364	1	7.5	NA	974364	G	C	1	0	0	1	0	0	0	0		0	0	0	0	0	0
Tf_S1_941450	1	7.5	941450	NA	G	C	1	0	0	1	0	0	0	0		0	0	0	0	0	0
Tf_Tl_S1_955372_S1_998964	1	7.5	955372	998964	C	G	1	0	1	0	0	0	0	0		0	0	0	0	0	0
Tf_Tl_S1_981801_S1_1080520	1	8	981801	1080520	C	T	1	0	0	1	0	0	0	0		0	0	0	0	0	0
Tf_Tl_S1_1131985_S1_1310872	1	9.1	1131985	1310872	A	T	2	3	1	0	1	0	0	0		1	1	1	0	0	0
Tf_Tl_S1_1142040_S1_1320912	1	9.1	1142040	1320912	T	C	2	1	0	1	0	1	0	0		0	0	0	1	0	0
Tf_Tl_S1_1142088_S1_1320960	1	9.1	1142088	1320960	T	G	2	3	1	0	1	0	0	0		1	1	1	0	0	0
Tf_S1_1158271	1	9.7	1158271	NA	-	T	3	3	0	0	1	0	1	1		1	0	0	0	1	1
Tf_Tl_S1_1158286_S1_1338982	1	9.7	1158286	1338982	G	T	2	1	0	0	0	0	1	1		0	0	0	0	0	1
Tf_S1_1158305	1	9.7	1158305	NA	C	A	3	3	0	0	1	0	1	1		1	0	0	0	1	1
Tl_S1_1339001	1	9.7	NA	1339001	C	A	3	3	0	0	1	0	1	1		1	0	0	0	1	1
Tl_S1_1339006	1	9.7	NA	1339006	C	G	3	3	0	0	1	0	1	1		1	0	0	0	1	1
Tf_S1_1158310	1	9.7	1158310	NA	C	G	3	3	0	0	1	0	1	1		1	0	0	0	1	1
Tf_S1_1158314	1	9.7	1158314	NA	T	-	3	3	0	0	1	0	1	1		1	0	0	0	1	1
Tl_S1_1339010	1	9.7	NA	1339010	T	-	3	3	0	0	1	0	1	1		1	0	0	0	1	1
Tf_Tl_S1_1186015_S1_1368324	1	10.1	1186015	1368324	C	T	1	2	1	0	0	0	0	0		0	1	1	0	0	0
Tf_Tl_S1_1186016_S1_1368325	1	10.1	1186016	1368325	G	A	1	1	0	0	0	1	0	0		0	0	0	0	1	0
Tf_Tl_S1_1219656_S1_1403955	1	10.7	1219656	1403955	A	T	1	0	0	0	0	1	0	0		0	0	0	0	0	0
Tf_Tl_S1_1219666_S1_1403965	1	11.4	1219666	1403965	C	G	2	1	0	0	0	0	1	1		0	0	0	0	0	1
Tf_Tl_S1_1219670_S1_1403969	1	11.4	1219670	1403969	C	A	1	0	0	1	0	0	0	0		0	0	0	0	0	0
Tf_Tl_S1_1219674_S1_1403973	1	11.4	1219674	1403973	G	A	1	0	0	1	0	0	0	0		0	0	0	0	0	0
Tf_Tl_S1_1223032_S1_1407096	1	11.4	1223032	1407096	T	C	1	0	0	1	0	0	0	0		0	0	0	0	0	0
Tf_Tl_S1_1223101_S1_1407165	1	11.4	1223101	1407165	A	G	2	1	0	0	0	0	1	1		0	0	0	0	0	1
Tf_Tl_S1_1223155_S1_1407219	1	11.7	1223155	1407219	G	A	1	0	0	1	0	0	0	0		0	0	0	0	0	0
Tf_Tl_S1_1224193_S1_1408261	1	12	1224193	1408261	C	T	5	1	0	1	1	1	1	1		0	0	0	0	0	1
Tf_Tl_S1_1224223_S1_1408291	1	12	1224223	1408291	C	T	5	1	0	1	1	1	1	1		0	0	0	0	0	1
Tf_Tl_S1_1224225_S1_1408293	1	12	1224225	1408293	G	A	5	1	0	1	1	1	1	1		0	0	0	0	0	1
Tf_Tl_S1_1230289_S1_1414451	1	12.1	1230289	1414451	T	-	4	1	0	1	1	0	1	1		0	0	0	0	0	1
Tf_Tl_S1_1230290_S1_1414452	1	12.1	1230290	1414452	A	T	1	0	0	0	1	0	0	0		0	0	0	0	0	0
Tf_Tl_S1_1232417_S1_1423372	1	12.1	1232417	1423372	T	C	1	0	0	1	0	0	0	0		0	0	0	0	0	0
Tl_S1_1424446	1	12.4	NA	1424446	C	A	0	1	0	0	0	0	0	0		0	0	1	0	0	0
Tf_Tl_S1_1235714_S1_1426679	1	12.4	1235714	1426679	A	G	1	0	0	1	0	0	0	0		0	0	0	0	0	0
Tf_Tl_S1_1237297_S1_1428255	1	12.4	1237297	1428255	G	T	0	1	0	0	0	0	0	0		0	0	1	0	0	0
Tf_Tl_S1_1266083_S1_1464484	1	12.4	1266083	1464484	T	C	1	0	0	1	0	0	0	0		0	0	0	0	0	0
Tf_Tl_S1_1297623_S1_1499460	1	13.1	1297623	1499460	A	G	0	1	0	0	0	0	0	0		1	0	0	0	0	0
Tf_S1_1297641	1	13.1	1297641	NA	G	A	3	3	0	1	0	0	1	1		0	1	1	0	0	1
Tl_S1_1499491	1	13.1	NA	1499491	-	A	3	3	0	1	0	0	1	1		0	1	1	0	0	1
Tl_S1_1499492	1	13.1	NA	1499492	A	-	3	3	0	1	0	0	1	1		0	1	1	0	0	1
Tf_Tl_S1_1301966_S1_1503778	1	13.1	1301966	1503778	C	G	0	1	0	0	0	0	0	0		1	0	0	0	0	0
Tf_Tl_S1_1302004_S1_1503816	1	13.4	1302004	1503816	G	T	2	2	0	0	0	0	1	1		0	0	1	0	0	1
Tf_Tl_S1_1310489_S1_1512307	1	13.4	1310489	1512307	G	-	1	0	0	0	1	0	0	0		0	0	0	0	0	0
Tf_Tl_S1_1329691_S1_1532501	1	13.4	1329691	1532501	T	-	1	0	0	1	0	0	0	0		0	0	0	0	0	0
Tf_Tl_S1_1329693_S1_1532503	1	13.4	1329693	1532503	-	A	1	0	0	1	0	0	0	0		0	0	0	0	0	0
Tf_Tl_S1_1354425_S1_1649869	1	14.1	1354425	1649869	C	A	2	2	1	0	0	1	0	0		0	0	0	1	1	0
Tl_S1_1653267	1	14.4	NA	1653267	G	T	2	0	0	1	1	0	0	0		0	0	0	0	0	0
Tf_S1_1357715	1	14.4	1357715	NA	G	T	2	0	0	1	1	0	0	0		0	0	0	0	0	0
Tf_Tl_S1_1357728_S1_1653280	1	14.5	1357728	1653280	G	A	0	2	0	0	0	0	0	0		1	1	0	0	0	0
Tl_S1_1653283	1	14.5	NA	1653283	C	T	2	2	0	1	1	0	0	0		1	1	0	0	0	0
Tf_S1_1357731	1	14.5	1357731	NA	C	T	2	2	0	1	1	0	0	0		1	1	0	0	0	0
Tl_S1_1653317	1	14.5	NA	1653317	G	-	2	2	1	0	0	1	0	0		0	0	0	1	1	0
Tl_S1_1653318	1	14.5	NA	1653318	-	T	2	2	0	1	1	0	0	0		1	1	0	0	0	0
Tf_S1_1357764	1	14.5	1357764	NA	A	-	2	2	1	0	0	1	0	0		0	0	0	1	1	0
Tf_Tl_S1_1360548_S1_1656101	1	14.8	1360548	1656101	C	T	1	0	0	0	1	0	0	0		0	0	0	0	0	0
Tf_Tl_S1_1362228_S1_1657781	1	14.8	1362228	1657781	C	T	1	0	0	0	1	0	0	0		0	0	0	0	0	0
Tf_Tl_S1_1362243_S1_1657796	1	14.8	1362243	1657796	G	T	1	0	0	0	1	0	0	0		0	0	0	0	0	0
Tf_S1_1365606	1	14.8	1365606	NA	T	-	3	2	1	1	0	1	0	0		0	0	0	1	1	0
Tf_Tl_S1_1365607_S1_1661161	1	14.8	1365607	1661161	-	T	3	2	1	1	0	1	0	0		0	0	0	1	1	0
Tf_S1_1365622	1	14.8	1365622	NA	A	-	3	2	1	1	0	1	0	0		0	0	0	1	1	0
Tf_S1_1365623	1	14.8	1365623	NA	C	T	3	2	1	1	0	1	0	0		0	0	0	1	1	0
Tf_Tl_S1_1365624_S1_1661164	1	15.6	1365624	1661164	G	A	0	1	0	0	0	0	0	0		1	0	0	0	0	0
Tf_Tl_S1_1365716_S1_1661256	1	15.6	1365716	1661256	C	A	0	1	0	0	0	0	0	0		0	1	0	0	0	0
Tf_Tl_S1_1367789_S1_1663347	1	15.6	1367789	1663347	A	T	0	1	0	0	0	0	0	0		1	0	0	0	0	0
Tf_Tl_S1_1367810_S1_1663368	1	15.6	1367810	1663368	G	T	0	1	0	0	0	0	0	0		0	1	0	0	0	0
Tf_Tl_S1_1367812_S1_1663370	1	15.6	1367812	1663370	G	T	1	1	0	1	0	0	0	0		0	1	0	0	0	0
Tf_Tl_S1_1373074_S1_1669197	1	15.6	1373074	1669197	C	T	2	0	0	1	1	0	0	0		0	0	0	0	0	0
Tf_Tl_S1_1373078_S1_1669201	1	15.6	1373078	1669201	A	G	1	0	0	1	0	0	0	0		0	0	0	0	0	0
Tf_Tl_S1_1373082_S1_1669205	1	15.6	1373082	1669205	G	A	0	1	0	0	0	0	0	0		1	0	0	0	0	0
Tf_S1_1375583	1	15.6	1375583	NA	A	C	0	1	0	0	0	0	0	0		1	0	0	0	0	0
Tl_S1_1671761	1	15.6	NA	1671761	A	C	0	1	0	0	0	0	0	0		1	0	0	0	0	0
Tf_Tl_S1_1375604_S1_1671782	1	15.6	1375604	1671782	T	C	0	1	0	0	0	0	0	0		0	1	0	0	0	0
Tf_S1_1389786	1	16.3	1389786	NA	A	G	2	1	0	0	0	0	1	1		0	0	0	0	0	1
Tf_S1_1389807	1	16.3	1389807	NA	A	C	1	0	0	0	1	0	0	0		0	0	0	0	0	0
Tf_Tl_S1_1391276_S1_1688434	1	16.3	1391276	1688434	C	A	0	2	0	0	0	0	0	0		1	0	1	0	0	0
Tl_S1_1698757	1	16.7	NA	1698757	G	A	0	2	0	0	0	0	0	0		1	0	1	0	0	0
Tf_Tl_S1_1399345_S1_1698779	1	16.7	1399345	1698779	A	G	0	2	0	0	0	0	0	0		1	0	1	0	0	0
Tf_Tl_S1_1399360_S1_1698791	1	16.7	1399360	1698791	C	A	0	2	0	0	0	0	0	0		1	0	1	0	0	0
Tf_Tl_S1_1406280_S1_1705954	1	16.7	1406280	1705954	C	G	1	0	0	0	1	0	0	0		0	0	0	0	0	0
Tf_Tl_S1_1423368_S1_1726134	1	16.7	1423368	1726134	T	C	2	0	0	1	1	0	0	0		0	0	0	0	0	0
Tf_S1_1442900	1	17.7	1442900	NA	A	G	0	1	0	0	0	0	0	0		1	0	0	0	0	0
Tl_S1_1752634	1	17.7	NA	1752634	A	G	0	1	0	0	0	0	0	0		1	0	0	0	0	0
Tl_S1_1790414	1	18.1	NA	1790414	T	C	0	1	0	0	0	0	0	0		1	0	0	0	0	0
Tl_S1_1819078	1	18.1	NA	1819078	A	G	3	1	0	0	1	0	1	1		0	0	0	0	0	1
Tl_S1_1826234	1	18.3	NA	1826234	-	G	1	0	0	1	0	0	0	0		0	0	0	0	0	0
Tl_S1_1826235	1	18.3	NA	1826235	G	-	1	0	0	1	0	0	0	0		0	0	0	0	0	0
Tf_Tl_S1_1493290_S1_1826289	1	18.3	1493290	1826289	C	T	1	0	0	1	0	0	0	0		0	0	0	0	0	0
Tf_Tl_S1_1493292_S1_1826291	1	18.3	1493292	1826291	C	T	2	1	0	0	0	0	1	1		0	0	0	0	0	1
Tf_Tl_S1_1524368_S1_1863805	1	18.4	1524368	1863805	-	A	1	0	0	1	0	0	0	0		0	0	0	0	0	0
Tf_Tl_S1_1524417_S1_1863854	1	18.4	1524417	1863854	T	-	1	0	0	1	0	0	0	0		0	0	0	0	0	0
Tl_S1_1871743	1	18.5	NA	1871743	A	G	2	2	0	0	0	0	1	1		1	0	0	0	0	1
Tl_S1_1871762	1	18.5	NA	1871762	A	G	2	2	0	0	0	0	1	1		1	0	0	0	0	1
Tl_S1_1871763	1	18.5	NA	1871763	C	A	0	1	0	0	0	0	0	0		0	1	0	0	0	0
Tl_S1_1871773	1	18.5	NA	1871773	A	G	2	2	0	0	0	0	1	1		1	0	0	0	0	1
Tl_S1_1871783	1	18.5	NA	1871783	-	A	0	1	0	0	0	0	0	0		0	1	0	0	0	0
Tl_S1_1871784	1	18.5	NA	1871784	A	-	0	1	0	0	0	0	0	0		0	1	0	0	0	0
Tf_S1_1534982	1	18.5	1534982	NA	A	G	2	2	0	0	0	0	1	1		1	0	0	0	0	1
Tf_S1_1535001	1	18.5	1535001	NA	A	G	2	2	0	0	0	0	1	1		1	0	0	0	0	1
Tf_S1_1535002	1	18.5	1535002	NA	C	A	0	1	0	0	0	0	0	0		0	1	0	0	0	0
Tf_S1_1535012	1	18.5	1535012	NA	A	G	2	2	0	0	0	0	1	1		1	0	0	0	0	1
Tf_Tl_S1_1543061_S1_1881215	1	18.7	1543061	1881215	A	T	2	3	0	0	0	0	1	1		1	1	0	0	0	1
Tf_Tl_S1_1543839_S1_1881993	1	18.7	1543839	1881993	C	T	0	1	0	0	0	0	0	0		1	0	0	0	0	0
Tf_Tl_S1_1546667_S1_1885036	1	18.7	1546667	1885036	C	A	1	0	0	1	0	0	0	0		0	0	0	0	0	0
Tf_Tl_S1_1546706_S1_1885075	1	18.9	1546706	1885075	T	C	3	3	0	1	0	0	1	1		1	1	0	0	0	1
Tf_Tl_S1_1561916_S1_1902358	1	18.9	1561916	1902358	C	T	0	1	0	0	0	0	0	0		1	0	0	0	0	0
Tf_Tl_S1_1581494_S1_1925121	1	18.9	1581494	1925121	C	G	2	0	0	0	0	0	1	1		0	0	0	0	0	0
Tl_S1_1926029	1	18.9	NA	1926029	G	C	0	1	0	0	0	0	0	0		0	1	0	0	0	0
Tl_S1_1926055	1	19.1	NA	1926055	-	T	2	0	0	0	0	0	1	1		0	0	0	0	0	0
Tl_S1_1932056	1	19.4	NA	1932056	G	T	2	1	0	0	0	0	1	1		0	1	0	0	0	0
Tf_S1_1588420	1	19.4	1588420	NA	G	T	2	1	0	0	0	0	1	1		0	1	0	0	0	0
Tf_Tl_S1_1588425_S1_1932061	1	19.4	1588425	1932061	T	C	0	1	0	0	0	0	0	0		0	1	0	0	0	0
Tl_S1_1932077	1	19.4	NA	1932077	A	C	1	0	0	1	0	0	0	0		0	0	0	0	0	0
Tl_S1_1932087	1	19.4	NA	1932087	T	C	1	0	0	1	0	0	0	0		0	0	0	0	0	0
Tf_S1_1588441	1	19.4	1588441	NA	A	C	1	0	0	1	0	0	0	0		0	0	0	0	0	0
Tf_S1_1593177	1	19.4	1593177	NA	G	A	2	0	0	1	1	0	0	0		0	0	0	0	0	0
Tf_S1_1593179	1	19.5	1593179	NA	A	G	2	0	0	0	0	0	1	1		0	0	0	0	0	0
Tf_S1_1593214	1	19.5	1593214	NA	T	C	3	1	0	1	0	0	1	1		0	1	0	0	0	0
Tf_S1_1600176	1	19.5	1600176	NA	C	-	1	0	0	0	1	0	0	0		0	0	0	0	0	0
Tf_S1_1600210	1	19.5	1600210	NA	C	T	1	0	0	0	1	0	0	0		0	0	0	0	0	0
Tl_S1_1945325	1	19.5	NA	1945325	C	-	1	0	0	0	1	0	0	0		0	0	0	0	0	0
Tl_S1_1945360	1	19.5	NA	1945360	C	T	1	0	0	0	1	0	0	0		0	0	0	0	0	0
Tf_S1_1600250	1	20	1600250	NA	G	T	1	2	0	1	0	0	0	0		1	1	0	0	0	0
Tf_S1_1600256	1	20	1600256	NA	G	T	1	2	0	1	0	0	0	0		1	1	0	0	0	0
Tl_S1_1945400	1	20	NA	1945400	G	T	1	2	0	1	0	0	0	0		1	1	0	0	0	0
Tl_S1_1945406	1	20	NA	1945406	G	T	1	2	0	1	0	0	0	0		1	1	0	0	0	0
Tf_S1_1609805	1	20.5	1609805	NA	A	-	3	0	0	1	0	0	1	1		0	0	0	0	0	0
Tf_S1_1609819	1	20.5	1609819	NA	T	C	1	0	0	1	0	0	0	0		0	0	0	0	0	0
Tf_S1_1609853	1	20.5	1609853	NA	-	T	3	0	0	1	0	0	1	1		0	0	0	0	0	0
Tl_S1_1952618	1	20.5	NA	1952618	T	C	1	0	0	1	0	0	0	0		0	0	0	0	0	0
Tf_Tl_S1_1613236_S1_1955926	1	20.5	1613236	1955926	T	A	2	0	0	0	0	0	1	1		0	0	0	0	0	0
Tf_Tl_S1_1617558_S1_1960333	1	21	1617558	1960333	C	G	4	1	0	1	1	0	1	1		1	0	0	0	0	0
Tf_Tl_S1_1617567_S1_1960342	1	21	1617567	1960342	C	T	0	1	0	0	0	0	0	0		1	0	0	0	0	0
Tf_Tl_S1_1617574_S1_1960349	1	21	1617574	1960349	C	A	0	1	0	0	0	0	0	0		1	0	0	0	0	0
Tf_Tl_S1_1617575_S1_1960350	1	21	1617575	1960350	C	T	0	1	0	0	0	0	0	0		0	1	0	0	0	0
Tf_Tl_S1_1617601_S1_1960376	1	21	1617601	1960376	T	C	4	1	0	1	1	0	1	1		1	0	0	0	0	0
Tf_S1_1619313	1	21	1619313	NA	C	T	0	1	0	0	0	0	0	0		1	0	0	0	0	0
Tl_S1_1962090	1	21	NA	1962090	C	T	0	1	0	0	0	0	0	0		1	0	0	0	0	0
Tf_Tl_S1_1619318_S1_1962095	1	21	1619318	1962095	T	A	1	0	0	0	1	0	0	0		0	0	0	0	0	0
Tf_Tl_S1_1620202_S1_1962973	1	21	1620202	1962973	C	T	4	2	0	1	1	0	1	1		1	1	0	0	0	0
Tf_Tl_S1_1620205_S1_1962976	1	21	1620205	1962976	A	G	1	0	0	1	0	0	0	0		0	0	0	0	0	0
Tf_Tl_S1_1620217_S1_1962988	1	21	1620217	1962988	T	C	0	1	0	0	0	0	0	0		1	0	0	0	0	0
Tf_Tl_S1_1620238_S1_1963009	1	21	1620238	1963009	T	C	4	2	0	1	1	0	1	1		1	1	0	0	0	0
Tf_Tl_S1_1620241_S1_1963012	1	21	1620241	1963012	G	A	1	0	0	0	1	0	0	0		0	0	0	0	0	0
Tf_Tl_S1_1639302_S1_1984162	1	21.7	1639302	1984162	G	A	0	1	0	0	0	0	0	0		1	0	0	0	0	0
Tf_Tl_S1_1642483_S1_1987425	1	21.8	1642483	1987425	T	-	2	0	0	0	0	0	1	1		0	0	0	0	0	0
Tf_Tl_S1_1642494_S1_1987436	1	21.8	1642494	1987436	-	T	2	0	0	0	0	0	1	1		0	0	0	0	0	0
Tf_Tl_S1_1701233_S1_2072036	1	22.4	1701233	2072036	C	-	1	0	0	0	1	0	0	0		0	0	0	0	0	0
Tf_Tl_S1_1701260_S1_2072063	1	22.4	1701260	2072063	G	A	0	1	0	0	0	0	0	0		1	0	0	0	0	0
Tf_Tl_S1_1701275_S1_2072078	1	22.4	1701275	2072078	C	T	1	0	0	0	1	0	0	0		0	0	0	0	0	0
Tf_Tl_S1_1718239_S1_2103953	1	22.4	1718239	2103953	G	C	0	1	0	0	0	0	0	0		1	0	0	0	0	0
Tf_Tl_S1_1770330_S1_2155348	1	23.3	1770330	2155348	C	G	2	1	0	0	0	0	1	1		0	1	0	0	0	0
Tf_Tl_S1_1770342_S1_2155360	1	23.6	1770342	2155360	C	G	2	0	0	0	0	0	1	1		0	0	0	0	0	0
Tf_Tl_S1_1770363_S1_2155381	1	23.7	1770363	2155381	G	A	1	0	0	0	0	1	0	0		0	0	0	0	0	0
Tf_S1_1770366	1	23.7	1770366	NA	A	-	0	1	0	0	0	0	0	0		0	1	0	0	0	0
Tf_S1_1773637	1	24.3	1773637	NA	C	T	3	2	0	0	0	1	1	1		1	1	0	0	0	0
Tl_S1_2158549	1	24.3	NA	2158549	C	T	3	2	0	0	0	1	1	1		1	1	0	0	0	0
Tf_Tl_S1_1773641_S1_2158553	1	24.3	1773641	2158553	T	A	1	0	0	1	0	0	0	0		0	0	0	0	0	0
Tl_S1_2158574	1	24.3	NA	2158574	G	A	3	2	0	0	0	1	1	1		1	1	0	0	0	0
Tf_S1_1773662	1	24.3	1773662	NA	G	A	3	2	0	0	0	1	1	1		1	1	0	0	0	0
Tf_Tl_S1_1776556_S1_2161952	1	24.3	1776556	2161952	T	G	1	0	0	1	0	0	0	0		0	0	0	0	0	0
Tl_S1_2165408	1	24.5	NA	2165408	T	C	1	0	0	0	1	0	0	0		0	0	0	0	0	0
Tl_S1_2165411	1	24.5	NA	2165411	A	G	1	0	0	1	0	0	0	0		0	0	0	0	0	0
Tf_S1_1781113	1	24.5	1781113	NA	T	C	1	0	0	0	1	0	0	0		0	0	0	0	0	0
Tf_S1_1781116	1	24.5	1781116	NA	A	G	1	0	0	1	0	0	0	0		0	0	0	0	0	0
Tf_Tl_S1_1784540_S1_2168856	1	24.5	1784540	2168856	A	T	1	0	0	1	0	0	0	0		0	0	0	0	0	0
Tf_Tl_S1_1784543_S1_2168859	1	24.5	1784543	2168859	A	C	1	0	0	1	0	0	0	0		0	0	0	0	0	0
Tf_Tl_S1_1803118_S1_2194850	1	24.5	1803118	2194850	G	A	2	0	0	0	0	0	1	1		0	0	0	0	0	0
Tf_Tl_S1_1803214_S1_2194946	1	24.6	1803214	2194946	T	G	2	0	0	0	0	0	1	1		0	0	0	0	0	0
Tf_Tl_S1_1827081_S1_2221827	1	25	1827081	2221827	A	C	0	2	0	0	0	0	0	0		0	0	0	1	1	0
Tl_S1_2237205	1	25	NA	2237205	C	T	1	0	0	0	0	0	1	0		0	0	0	0	0	0
Tl_S1_2245179	1	25	NA	2245179	T	-	1	0	0	1	0	0	0	0		0	0	0	0	0	0
Tl_S1_2245238	1	25	NA	2245238	-	A	1	0	0	1	0	0	0	0		0	0	0	0	0	0
Tf_S1_1874974	1	25.1	1874974	NA	A	G	3	0	0	1	0	0	1	1		0	0	0	0	0	0
Tl_S1_2274535	1	25.1	NA	2274535	A	G	3	0	0	1	0	0	1	1		0	0	0	0	0	0
Tf_Tl_S1_1879986_S1_2279931	1	25.5	1879986	2279931	T	C	0	1	0	0	0	0	0	0		0	1	0	0	0	0
Tf_Tl_S1_1879998_S1_2279943	1	25.5	1879998	2279943	C	A	0	1	0	0	0	0	0	0		0	1	0	0	0	0
Tf_Tl_S1_1897268_S1_2304926	1	25.5	1897268	2304926	C	T	1	0	0	1	0	0	0	0		0	0	0	0	0	0
Tf_Tl_S1_1903565_S1_2309777	1	25.5	1903565	2309777	C	T	1	1	0	0	0	1	0	0		0	1	0	0	0	0
Tf_Tl_S1_1903611_S1_2309823	1	25.5	1903611	2309823	T	-	3	1	0	1	0	0	1	1		1	0	0	0	0	0
Tf_Tl_S1_1903612_S1_2309824	1	25.5	1903612	2309824	T	-	1	1	0	0	0	1	0	0		0	1	0	0	0	0
Tf_Tl_S1_1904247_S1_2310448	1	25.5	1904247	2310448	C	T	4	2	0	1	0	1	1	1		1	1	0	0	0	0
Tf_Tl_S1_1904261_S1_2310462	1	25.5	1904261	2310462	G	T	1	0	0	1	0	0	0	0		0	0	0	0	0	0
Tf_Tl_S1_1909588_S1_2315900	1	25.5	1909588	2315900	T	C	1	1	0	0	0	1	0	0		0	1	0	0	0	0
Tf_Tl_S1_1937532_S1_2350177	1	27.4	1937532	2350177	G	-	1	0	0	1	0	0	0	0		0	0	0	0	0	0
Tf_Tl_S1_1959087_S1_2385300	1	27.5	1959087	2385300	T	A	0	1	0	0	0	0	0	0		0	0	0	0	0	1
Tf_Tl_S1_1959122_S1_2385335	1	27.5	1959122	2385335	A	T	1	1	1	0	0	0	0	0		0	0	1	0	0	0
Tf_Tl_S1_1970307_S1_2397906	1	27.5	1970307	2397906	G	T	0	2	0	0	0	0	0	0		0	0	0	1	1	0
Tf_S1_2002246	1	28.2	2002246	NA	A	T	1	1	0	0	1	0	0	0		1	0	0	0	0	0
Tf_Tl_S1_2091984_S1_2513896	1	28.6	2091984	2513896	T	C	0	2	0	0	0	0	0	0		1	0	0	0	0	1
Tf_Tl_S1_2091994_S1_2513906	1	28.6	2091994	2513906	G	C	1	2	0	0	1	0	0	0		0	0	1	0	0	1
Tf_Tl_S1_2092003_S1_2513915	1	28.6	2092003	2513915	C	A	0	1	0	0	0	0	0	0		0	0	0	0	0	1
Tf_Tl_S1_2093171_S1_2515296	1	28.7	2093171	2515296	A	G	0	2	0	0	0	0	0	0		1	0	0	0	0	1
Tf_Tl_S1_2093173_S1_2515298	1	29.5	2093173	2515298	C	T	0	2	0	0	0	0	0	0		0	0	0	1	1	0
Tf_Tl_S1_2093199_S1_2515324	1	29.5	2093199	2515324	G	A	0	1	0	0	0	0	0	0		0	0	1	0	0	0
Tf_Tl_S1_2093220_S1_2515345	1	29.5	2093220	2515345	C	T	2	0	0	1	0	1	0	0		0	0	0	0	0	0
Tf_S1_2094556	1	29.6	2094556	NA	C	T	3	2	1	0	0	0	1	1		1	1	0	0	0	0
Tl_S1_2516609	1	29.6	NA	2516609	C	T	3	2	1	0	0	0	1	1		1	1	0	0	0	0
Tf_Tl_S1_2094562_S1_2516615	1	29.6	2094562	2516615	A	G	3	1	0	1	1	1	0	0		0	0	0	0	0	1
Tf_Tl_S1_2104864_S1_2526987	1	30	2104864	2526987	A	C	0	1	0	0	0	0	0	0		0	1	0	0	0	0
Tf_Tl_S1_2104893_S1_2527016	1	30.2	2104893	2527016	T	A	2	0	1	0	1	0	0	0		0	0	0	0	0	0
Tf_S1_2112720	1	30.2	2112720	NA	T	A	1	1	0	1	0	0	0	0		1	0	0	0	0	0
Tf_S1_2112747	1	30.2	2112747	NA	-	A	1	1	0	1	0	0	0	0		1	0	0	0	0	0
Tf_S1_2112748	1	30.2	2112748	NA	A	-	1	1	0	1	0	0	0	0		1	0	0	0	0	0
Tl_S1_2539901	1	30.2	NA	2539901	T	A	1	1	0	1	0	0	0	0		1	0	0	0	0	0
Tf_Tl_S1_2116622_S1_2549093	1	30.3	2116622	2549093	A	G	1	0	0	1	0	0	0	0		0	0	0	0	0	0
Tf_Tl_S1_2122048_S1_2554666	1	30.3	2122048	2554666	A	G	2	0	1	0	1	0	0	0		0	0	0	0	0	0
Tf_Tl_S1_2124080_S1_2556703	1	30.3	2124080	2556703	A	C	0	1	0	0	0	0	0	0		1	0	0	0	0	0
Tf_Tl_S1_2124239_S1_2556862	1	30.3	2124239	2556862	G	A	2	0	1	0	1	0	0	0		0	0	0	0	0	0
Tf_Tl_S1_2125390_S1_2557995	1	30.3	2125390	2557995	C	G	0	2	0	0	0	0	0	0		0	0	0	1	1	0
Tf_Tl_S1_2126965_S1_2559586	1	30.3	2126965	2559586	T	A	2	0	0	0	0	0	1	1		0	0	0	0	0	0
Tf_Tl_S1_2126974_S1_2559595	1	30.7	2126974	2559595	T	A	0	2	0	0	0	0	0	0		0	0	0	1	1	0
Tf_Tl_S1_2133171_S1_2565728	1	31	2133171	2565728	C	G	0	1	0	0	0	0	0	0		1	0	0	0	0	0
Tf_Tl_S1_2133174_S1_2565731	1	31	2133174	2565731	C	T	0	1	0	0	0	0	0	0		0	1	0	0	0	0
Tf_S1_2146222	1	31.3	2146222	NA	T	C	1	0	0	0	0	1	0	0		0	0	0	0	0	0
Tl_S1_2580192	1	31.3	NA	2580192	T	C	1	0	0	0	0	1	0	0		0	0	0	0	0	0
Tf_Tl_S1_2146229_S1_2580199	1	31.3	2146229	2580199	A	T	1	1	0	0	0	1	0	0		0	0	1	0	0	0
Tf_Tl_S1_2241657_S1_2703192	1	31.5	2241657	2703192	A	G	0	1	0	0	0	0	0	0		1	0	0	0	0	0
Tl_S1_2862715	1	33.2	NA	2862715	C	T	1	0	0	0	1	0	0	0		0	0	0	0	0	0
Tf_S1_2483062	1	33.8	2483062	NA	T	C	1	0	0	0	0	1	0	0		0	0	0	0	0	0
Tf_Tl_S1_2485243_S1_2974593	1	33.8	2485243	2974593	-	T	1	0	0	0	0	1	0	0		0	0	0	0	0	0
Tf_S1_2515840	1	34.6	2515840	NA	A	-	1	0	0	1	0	0	0	0		0	0	0	0	0	0
Tf_S1_2515841	1	34.6	2515841	NA	T	-	1	0	0	1	0	0	0	0		0	0	0	0	0	0
Tl_S1_3047265	1	34.6	NA	3047265	A	-	1	0	0	1	0	0	0	0		0	0	0	0	0	0
Tl_S1_3047270	1	34.6	NA	3047270	G	A	2	2	0	1	1	0	0	0		1	1	0	0	0	0
Tf_S1_2518403	1	34.6	2518403	NA	G	A	2	0	1	1	0	0	0	0		0	0	0	0	0	0
Tf_Tl_S1_2523450_S1_3053383	1	34.6	2523450	3053383	C	A	1	0	0	1	0	0	0	0		0	0	0	0	0	0
Tf_Tl_S1_2523463_S1_3053396	1	34.6	2523463	3053396	C	A	1	0	0	0	1	0	0	0		0	0	0	0	0	0
Tf_Tl_S1_2523465_S1_3053398	1	34.8	2523465	3053398	C	G	2	2	0	1	1	0	0	0		1	1	0	0	0	0
Tf_Tl_S1_2523476_S1_3053409	1	34.8	2523476	3053409	T	C	1	0	1	0	0	0	0	0		0	0	0	0	0	0
Tf_Tl_S1_2528860_S1_3059609	1	35.5	2528860	3059609	T	C	2	0	0	0	0	0	1	1		0	0	0	0	0	0
Tl_S1_3064464	1	35.6	NA	3064464	G	T	1	0	0	0	1	0	0	0		0	0	0	0	0	0
Tl_S1_3085705	1	35.8	NA	3085705	A	T	0	1	0	0	0	0	0	0		1	0	0	0	0	0
Tl_S1_3085732	1	35.8	NA	3085732	T	-	0	1	0	0	0	0	0	0		1	0	0	0	0	0
Tl_S1_3085743	1	35.8	NA	3085743	C	T	2	0	1	0	1	0	0	0		0	0	0	0	0	0
Tf_S1_2554446	1	36.3	2554446	NA	C	T	0	1	0	0	0	0	0	0		0	1	0	0	0	0
Tf_S1_2569120	1	36.3	2569120	NA	A	-	2	0	0	0	0	0	1	1		0	0	0	0	0	0
Tl_S1_3097712	1	36.3	NA	3097712	G	A	1	2	0	1	0	0	0	0		0	0	1	0	0	1
Tf_S1_2569125	1	36.3	2569125	NA	G	A	1	2	0	1	0	0	0	0		0	0	1	0	0	1
Tf_Tl_S1_2569135_S1_3097722	1	36.3	2569135	3097722	G	A	2	0	0	0	0	0	1	1		0	0	0	0	0	0
Tf_Tl_S1_2569149_S1_3097736	1	36.3	2569149	3097736	C	T	0	1	0	0	0	0	0	0		1	0	0	0	0	0
Tl_S1_3161164	1	37.5	NA	3161164	T	C	1	0	0	0	0	1	0	0		0	0	0	0	0	0
Tf_S1_2610787	1	37.5	2610787	NA	A	-	1	0	0	0	0	1	0	0		0	0	0	0	0	0
Tf_S1_2610827	1	37.5	2610827	NA	-	A	1	0	0	0	0	1	0	0		0	0	0	0	0	0
Tf_S1_2610849	1	37.5	2610849	NA	T	A	0	1	0	0	0	0	0	0		0	0	1	0	0	0
Tl_S1_3161193	1	37.5	NA	3161193	A	T	2	1	0	0	0	0	1	1		0	0	0	0	0	1
Tf_Tl_S1_2706728_S1_3181262	1	38	2706728	3181262	G	A	2	0	0	0	0	0	1	1		0	0	0	0	0	0
Tf_Tl_S1_2706736_S1_3181270	1	38	2706736	3181270	A	G	2	0	0	0	0	0	1	1		0	0	0	0	0	0
Tf_S1_2853977	1	40.1	2853977	NA	A	G	1	3	0	0	1	0	0	0		0	0	0	1	1	1
Tf_Tl_S1_2859390_S1_3356409	1	40.1	2859390	3356409	G	C	2	0	1	1	0	0	0	0		0	0	0	0	0	0
Tf_Tl_S1_2859423_S1_3356442	1	40.1	2859423	3356442	C	T	1	0	0	1	0	0	0	0		0	0	0	0	0	0
Tf_Tl_S1_2859428_S1_3356447	1	40.1	2859428	3356447	T	A	2	2	0	1	1	0	0	0		1	1	0	0	0	0
Tf_Tl_S1_2886077_S1_3389315	1	40.1	2886077	3389315	A	G	1	0	0	0	0	1	0	0		0	0	0	0	0	0
Tf_Tl_S1_3018409_S1_3528836	1	41.1	3018409	3528836	G	A	3	0	1	0	0	0	1	1		0	0	0	0	0	0
Tf_Tl_S1_3018419_S1_3528846	1	41.1	3018419	3528846	G	A	0	2	0	0	0	0	0	0		1	1	0	0	0	0
Tf_Tl_S1_3042960_S1_3556160	1	41.1	3042960	3556160	A	G	0	2	0	0	0	0	0	0		1	1	0	0	0	0
Tf_Tl_S1_3043042_S1_3556242	1	41.1	3043042	3556242	T	C	1	0	0	0	0	1	0	0		0	0	0	0	0	0
Tf_Tl_S1_3047849_S1_3561020	1	41.1	3047849	3561020	A	T	0	1	0	0	0	0	0	0		0	0	1	0	0	0
Tf_Tl_S1_3047857_S1_3561028	1	41.1	3047857	3561028	C	T	0	1	0	0	0	0	0	0		0	0	1	0	0	0
Tf_Tl_S1_3047896_S1_3561067	1	41.1	3047896	3561067	T	C	0	2	0	0	0	0	0	0		1	1	0	0	0	0
Tf_Tl_S1_3081121_S1_3595985	1	41.1	3081121	3595985	G	A	3	0	1	0	0	0	1	1		0	0	0	0	0	0
Tf_S1_3098115	1	41.7	3098115	NA	C	T	1	0	0	1	0	0	0	0		0	0	0	0	0	0
Tl_S1_3617547	1	41.7	NA	3617547	C	T	1	0	0	1	0	0	0	0		0	0	0	0	0	0
Tf_Tl_S1_3098649_S1_3618080	1	41.7	3098649	3618080	A	T	0	2	0	0	0	0	0	0		0	0	0	1	1	0
Tf_Tl_S1_3106779_S1_3626986	1	41.7	3106779	3626986	A	G	0	1	0	0	0	0	0	0		0	0	1	0	0	0
Tf_Tl_S1_3106797_S1_3627004	1	41.7	3106797	3627004	G	A	2	0	0	0	1	1	0	0		0	0	0	0	0	0
Tf_Tl_S1_3108899_S1_3629082	1	41.7	3108899	3629082	A	-	0	1	0	0	0	0	0	0		0	0	1	0	0	0
Tf_Tl_S1_3108904_S1_3629087	1	41.7	3108904	3629087	G	A	0	2	0	0	0	0	0	0		1	1	0	0	0	0
Tf_Tl_S1_3108909_S1_3629092	1	42	3108909	3629092	A	G	1	2	0	1	0	0	0	0		0	0	0	1	1	0
Tf_Tl_S1_3108936_S1_3629119	1	42	3108936	3629119	A	G	1	2	0	1	0	0	0	0		0	0	0	1	1	0
Tf_Tl_S1_3127047_S1_3648962	1	42	3127047	3648962	G	A	0	1	0	0	0	0	0	0		0	0	1	0	0	0
Tf_Tl_S1_3159246_S1_3675835	1	42.6	3159246	3675835	A	G	2	2	0	0	1	1	0	0		0	0	1	0	0	1
Tf_Tl_S1_3159258_S1_3675847	1	42.6	3159258	3675847	A	G	0	2	0	0	0	0	0	0		1	1	0	0	0	0
Tf_Tl_S1_3162763_S1_3680537	1	42.6	3162763	3680537	A	G	0	2	0	0	0	0	0	0		0	0	0	1	1	0
Tf_Tl_S1_3162766_S1_3680540	1	42.6	3162766	3680540	A	G	2	0	0	0	0	0	1	1		0	0	0	0	0	0
Tf_Tl_S1_3242077_S1_3711796	1	42.6	3242077	3711796	A	T	1	0	0	1	0	0	0	0		0	0	0	0	0	0
Tf_S1_3247640	1	42.6	3247640	NA	C	G	1	0	0	1	0	0	0	0		0	0	0	0	0	0
Tl_S1_3711799	1	42.6	NA	3711799	-	T	2	0	0	1	0	1	0	0		0	0	0	0	0	0
Tl_S1_3711800	1	42.6	NA	3711800	T	-	1	0	0	1	0	0	0	0		0	0	0	0	0	0
Tl_S1_3717250	1	42.6	NA	3717250	C	G	1	0	0	1	0	0	0	0		0	0	0	0	0	0
Tf_Tl_S1_3286249_S1_3743384	1	43.7	3286249	3743384	G	T	0	1	0	0	0	0	0	0		0	0	1	0	0	0
Tf_S1_3288851	1	43.7	3288851	NA	A	-	0	2	0	0	0	0	0	0		0	0	0	1	1	0
Tf_S1_3288894	1	43.7	3288894	NA	T	G	0	2	0	0	0	0	0	0		0	0	0	1	1	0
Tl_S1_3745988	1	43.7	NA	3745988	A	-	0	2	0	0	0	0	0	0		0	0	0	1	1	0
Tl_S1_3746015	1	43.7	NA	3746015	C	-	2	1	1	0	1	0	0	0		0	0	1	0	0	0
Tl_S1_3746016	1	43.7	NA	3746016	C	-	2	1	1	0	1	0	0	0		0	0	1	0	0	0
Tl_S1_3746033	1	43.7	NA	3746033	T	G	0	2	0	0	0	0	0	0		0	0	0	1	1	0
Tf_S1_3288899	1	43.7	3288899	NA	T	-	0	2	0	0	0	0	0	0		0	0	0	1	1	0
Tl_S1_3746035	1	43.7	NA	3746035	C	A	2	1	1	0	1	0	0	0		0	0	1	0	0	0
Tf_Tl_S1_3302682_S1_3761507	1	44.3	3302682	3761507	T	C	0	2	0	0	0	0	0	0		0	0	1	0	0	1
Tf_Tl_S1_3302724_S1_3761549	1	44.3	3302724	3761549	T	C	1	2	0	0	0	1	0	0		0	0	1	0	0	1
Tf_Tl_S1_3304979_S1_3763900	1	44.7	3304979	3763900	C	T	2	0	1	0	1	0	0	0		0	0	0	0	0	0
Tl_S1_3795718	1	45	NA	3795718	C	G	0	2	0	0	0	0	0	0		0	0	1	0	0	1
Tf_S1_3330935	1	45	3330935	NA	C	G	0	2	0	0	0	0	0	0		0	0	1	0	0	1
Tf_Tl_S1_3330964_S1_3795747	1	45.1	3330964	3795747	G	T	1	0	0	0	0	1	0	0		0	0	0	0	0	0
Tf_S1_3336758	1	45.7	3336758	NA	-	A	1	2	0	0	0	0	0	1		1	1	0	0	0	0
Tf_S1_3336790	1	45.7	3336790	NA	G	A	0	2	0	0	0	0	0	0		1	1	0	0	0	0
Tf_S1_3336808	1	45.7	3336808	NA	T	-	1	2	0	0	0	0	0	1		1	1	0	0	0	0
Tf_Tl_S1_3343939_S1_3812577	1	46	3343939	3812577	T	G	0	2	0	0	0	0	0	0		1	1	0	0	0	0
Tf_Tl_S1_3343941_S1_3812579	1	46	3343941	3812579	T	C	3	0	0	1	0	1	1	0		0	0	0	0	0	0
Tf_S1_3343943	1	46	3343943	NA	C	G	3	0	0	1	0	1	1	0		0	0	0	0	0	0
Tl_S1_3812581	1	46	NA	3812581	C	G	3	0	0	1	0	1	1	0		0	0	0	0	0	0
Tf_Tl_S1_3343966_S1_3812604	1	46	3343966	3812604	C	T	1	0	0	0	0	0	1	0		0	0	0	0	0	0
Tl_S1_3836264	1	46	NA	3836264	T	A	1	2	0	0	0	0	0	1		0	0	0	1	1	0
Tl_S1_3836283	1	46	NA	3836283	A	T	1	2	0	0	0	0	0	1		0	0	0	1	1	0
Tf_Tl_S1_3366529_S1_3838889	1	46.2	3366529	3838889	A	G	1	0	0	0	0	0	0	1		0	0	0	0	0	0
Tf_Tl_S1_3387005_S1_3861540	1	46.5	3387005	3861540	A	C	0	2	0	0	0	0	0	0		0	0	0	1	1	0
Tf_Tl_S1_3388318_S1_3862853	1	46.5	3388318	3862853	G	T	0	2	0	0	0	0	0	0		0	0	0	1	1	0
Tf_Tl_S1_3388325_S1_3862860	1	46.5	3388325	3862860	T	C	4	2	0	1	0	1	1	1		0	0	1	0	0	1
Tf_Tl_S1_3393944_S1_3868465	1	47.1	3393944	3868465	A	C	1	0	0	0	0	0	0	1		0	0	0	0	0	0
Tf_Tl_S1_3430438_S1_3918361	1	47.1	3430438	3918361	T	G	0	1	0	0	0	0	0	0		0	1	0	0	0	0
Tf_Tl_S1_3430472_S1_3918395	1	47.1	3430472	3918395	A	T	3	2	1	0	1	0	0	1		0	1	0	0	0	1
Tf_Tl_S1_3440321_S1_3927648	1	47.4	3440321	3927648	A	G	3	0	1	0	1	0	0	1		0	0	0	0	0	0
Tf_Tl_S1_3445158_S1_3933297	1	47.4	3445158	3933297	C	A	1	1	0	0	0	1	0	0		0	1	0	0	0	0
Tf_Tl_S1_3450348_S1_3941126	1	47.4	3450348	3941126	T	G	0	1	0	0	0	0	0	0		1	0	0	0	0	0
Tf_S1_3461354	1	47.4	3461354	NA	G	A	0	2	0	0	0	0	0	0		0	0	0	1	1	0
Tl_S1_3953422	1	47.4	NA	3953422	G	A	0	2	0	0	0	0	0	0		0	0	0	1	1	0
Tl_S1_3953450	1	47.4	NA	3953450	-	A	0	2	0	0	0	0	0	0		0	0	0	1	1	0
Tf_S1_3461382	1	47.4	3461382	NA	-	A	0	2	0	0	0	0	0	0		0	0	0	1	1	0
Tl_S1_3953452	1	47.4	NA	3953452	G	A	0	1	0	0	0	0	0	0		0	1	0	0	0	0
Tf_S1_3461384	1	47.4	3461384	NA	G	A	0	1	0	0	0	0	0	0		0	1	0	0	0	0
Tl_S1_3953460	1	48.2	NA	3953460	-	A	0	2	0	0	0	0	0	0		1	0	0	0	0	1
Tl_S1_3953461	1	48.2	NA	3953461	-	T	0	2	0	0	0	0	0	0		1	0	0	0	0	1
Tf_S1_3461392	1	48.2	3461392	NA	-	A	0	2	0	0	0	0	0	0		1	0	0	0	0	1
Tf_S1_3461393	1	48.2	3461393	NA	-	T	0	2	0	0	0	0	0	0		1	0	0	0	0	1
Tl_S1_3953462	1	48.2	NA	3953462	A	-	0	1	0	0	0	0	0	0		1	0	0	0	0	0
Tf_S1_3461394	1	48.2	3461394	NA	A	-	0	1	0	0	0	0	0	0		1	0	0	0	0	0
Tf_S1_3465494	1	48.6	3465494	NA	C	A	1	1	0	1	0	0	0	0		0	0	1	0	0	0
Tf_Tl_S1_3471047_S1_3964188	1	48.8	3471047	3964188	T	A	1	0	0	0	0	0	1	0		0	0	0	0	0	0
Tf_Tl_S1_3473848_S1_3967135	1	48.8	3473848	3967135	G	A	0	1	0	0	0	0	0	0		1	0	0	0	0	0
Tf_Tl_S1_3473867_S1_3967154	1	48.8	3473867	3967154	A	T	1	0	0	0	0	0	1	0		0	0	0	0	0	0
Tf_Tl_S1_3473872_S1_3967159	1	48.8	3473872	3967159	-	G	3	0	1	0	1	0	0	1		0	0	0	0	0	0
Tf_Tl_S1_3473873_S1_3967160	1	48.9	3473873	3967160	A	-	3	0	1	0	1	0	0	1		0	0	0	0	0	0
Tf_Tl_S1_3475242_S1_3968477	1	49	3475242	3968477	T	A	3	0	1	0	1	0	0	1		0	0	0	0	0	0
Tl_S1_3975860	1	49	NA	3975860	G	T	0	1	0	0	0	0	0	0		0	1	0	0	0	0
Tf_S1_3480958	1	49	3480958	NA	G	T	0	1	0	0	0	0	0	0		0	1	0	0	0	0
Tl_S1_3975883	1	49	NA	3975883	G	C	1	0	0	0	0	0	1	0		0	0	0	0	0	0
Tf_S1_3480981	1	49	3480981	NA	G	C	1	0	0	0	0	0	1	0		0	0	0	0	0	0
Tl_S1_3977842	1	49	NA	3977842	G	T	1	1	0	0	0	1	0	0		1	0	0	0	0	0
Tf_S1_3482753	1	49	3482753	NA	G	T	1	1	0	0	0	1	0	0		1	0	0	0	0	0
Tf_Tl_S1_3482791_S1_3977880	1	49	3482791	3977880	G	C	1	3	0	1	0	0	0	0		0	0	1	1	1	0
Tf_Tl_S1_3483450_S1_3978539	1	49	3483450	3978539	T	C	1	1	0	0	0	0	1	0		0	1	0	0	0	0
Tl_S1_3983515	1	49	NA	3983515	-	T	1	0	0	0	0	0	1	0		0	0	0	0	0	0
Tf_Tl_S1_3488167_S1_3983525	1	49	3488167	3983525	A	-	1	0	0	0	0	0	1	0		0	0	0	0	0	0
Tf_Tl_S1_3488186_S1_3983544	1	49	3488186	3983544	C	-	1	0	0	0	0	0	1	0		0	0	0	0	0	0
Tf_Tl_S1_3488592_S1_3983943	1	49	3488592	3983943	C	T	0	2	0	0	0	0	0	0		1	1	0	0	0	0
Tf_Tl_S1_3544934_S1_4033983	1	49	3544934	4033983	T	C	1	0	0	0	0	0	1	0		0	0	0	0	0	0
Tf_Tl_S1_3547335_S1_4036895	1	49	3547335	4036895	A	G	1	0	0	0	0	0	1	0		0	0	0	0	0	0
Tf_Tl_S1_3547343_S1_4036903	1	49	3547343	4036903	C	G	0	1	0	0	0	0	0	0		1	0	0	0	0	0
Tf_Tl_S1_3548069_S1_4037629	1	49	3548069	4037629	T	A	4	1	1	0	1	0	1	1		1	0	0	0	0	0
Tl_S1_4037650	1	49.3	NA	4037650	T	C	0	2	0	0	0	0	0	0		0	0	0	1	1	0
Tf_S1_3548090	1	49.3	3548090	NA	T	C	0	2	0	0	0	0	0	0		0	0	0	1	1	0
Tl_S1_4040659	1	49.3	NA	4040659	T	-	0	2	0	0	0	0	0	0		0	0	0	1	1	0
Tl_S1_4040663	1	49.3	NA	4040663	G	C	0	2	0	0	0	0	0	0		0	0	0	1	1	0
Tf_Tl_S1_3561963_S1_4051096	1	49.4	3561963	4051096	A	C	1	0	0	0	0	0	1	0		0	0	0	0	0	0
Tl_S1_4051111	1	49.5	NA	4051111	C	T	0	2	0	0	0	0	0	0		0	0	0	1	1	0
Tf_Tl_S1_3561978_S1_4051121	1	49.5	3561978	4051121	C	T	0	2	0	0	0	0	0	0		0	0	0	1	1	0
Tf_Tl_S1_3583982_S1_4086687	1	49.8	3583982	4086687	G	A	1	1	0	1	0	0	0	0		0	0	1	0	0	0
Tl_S1_4104351	1	49.8	NA	4104351	C	A	1	1	0	0	0	0	0	1		0	0	0	0	0	1
Tf_S1_3600814	1	49.8	3600814	NA	C	A	1	1	0	0	0	0	0	1		0	0	0	0	0	1
Tf_S1_3611431	1	50.1	3611431	NA	C	T	1	2	0	0	0	0	1	0		0	0	0	1	1	0
Tl_S1_4115812	1	50.1	NA	4115812	C	T	1	2	0	0	0	0	1	0		0	0	0	1	1	0
Tf_Tl_S1_3611479_S1_4115860	1	50.3	3611479	4115860	A	G	0	2	0	0	0	0	0	0		1	1	0	0	0	0
Tf_Tl_S1_3617004_S1_4121395	1	50.3	3617004	4121395	G	A	2	0	1	0	1	0	0	0		0	0	0	0	0	0
Tf_Tl_S1_3617007_S1_4121398	1	50.3	3617007	4121398	T	C	0	2	0	0	0	0	0	0		0	0	0	1	1	0
Tf_Tl_S1_3649604_S1_4152717	1	50.7	3649604	4152717	G	T	1	1	0	0	0	0	1	0		0	0	0	0	0	1
Tf_Tl_S1_3675625_S1_4183834	1	50.7	3675625	4183834	T	C	2	0	1	0	1	0	0	0		0	0	0	0	0	0
Tf_S1_3849433	1	52.7	3849433	NA	C	T	0	1	0	0	0	0	0	0		0	1	0	0	0	0
Tf_S1_3849466	1	53.2	3849466	NA	G	A	2	0	0	0	0	0	1	1		0	0	0	0	0	0
Tf_Tl_S1_3858410_S1_4353794	1	53.2	3858410	4353794	A	G	1	0	0	0	0	1	0	0		0	0	0	0	0	0
Tf_Tl_S1_3863032_S1_4359123	1	53.2	3863032	4359123	A	G	0	1	0	0	0	0	0	0		1	0	0	0	0	0
Tf_S1_3882687	1	53.4	3882687	NA	G	T	1	0	0	0	0	1	0	0		0	0	0	0	0	0
Tf_Tl_S1_3882774_S1_4369785	1	53.4	3882774	4369785	C	A	0	1	0	0	0	0	0	0		0	1	0	0	0	0
Tf_S1_3930004	1	53.8	3930004	NA	T	C	1	0	0	0	0	0	0	1		0	0	0	0	0	0
Tf_S1_3930006	1	53.8	3930006	NA	C	G	1	0	0	1	0	0	0	0		0	0	0	0	0	0
Tf_S1_3930022	1	53.8	3930022	NA	T	C	1	0	0	1	0	0	0	0		0	0	0	0	0	0
Tf_Tl_S1_3944223_S1_4427237	1	54.1	3944223	4427237	G	A	1	0	0	0	0	1	0	0		0	0	0	0	0	0
Tf_Tl_S1_3954317_S1_4438759	1	54.1	3954317	4438759	T	A	2	2	1	0	1	0	0	0		0	0	0	1	1	0
Tf_Tl_S1_4001224_S1_4486908	1	54.1	4001224	4486908	T	G	2	0	0	0	0	1	0	1		0	0	0	0	0	0
Tf_S1_4015061	1	54.1	4015061	NA	T	-	1	2	0	0	0	0	1	0		0	0	1	0	0	1
Tf_S1_4015063	1	54.5	4015063	NA	T	A	2	0	1	0	1	0	0	0		0	0	0	0	0	0
Tf_S1_4015064	1	54.5	4015064	NA	-	T	3	0	1	0	1	0	0	1		0	0	0	0	0	0
Tf_S1_4015065	1	54.5	4015065	NA	-	A	1	0	0	0	0	0	0	1		0	0	0	0	0	0
Tf_S1_4015073	1	54.5	4015073	NA	C	A	2	0	1	0	1	0	0	0		0	0	0	0	0	0
Tf_Tl_S1_4015600_S1_4496593	1	54.5	4015600	4496593	T	C	1	0	0	0	0	0	1	0		0	0	0	0	0	0
Tf_Tl_S1_4015620_S1_4496613	1	54.6	4015620	4496613	T	A	1	0	0	0	0	0	0	1		0	0	0	0	0	0
Tl_S1_4548675	1	54.6	NA	4548675	G	A	0	1	0	0	0	0	0	0		0	0	1	0	0	0
Tf_S1_4210868	1	55.1	4210868	NA	A	G	0	1	0	0	0	0	0	0		1	0	0	0	0	0
Tf_Tl_S1_4288626_S1_4888067	1	56.9	4288626	4888067	C	G	3	3	0	0	0	1	1	1		0	0	0	1	1	1
Tl_S1_4916982	1	57	NA	4916982	C	T	1	2	0	1	0	0	0	0		1	1	0	0	0	0
Tf_S1_4322687	1	57	4322687	NA	C	T	1	2	0	1	0	0	0	0		1	1	0	0	0	0
Tf_Tl_S1_4322716_S1_4917011	1	57	4322716	4917011	C	A	0	2	0	0	0	0	0	0		0	0	0	1	1	0
Tf_S1_4367706	1	58.5	4367706	NA	G	C	0	2	0	0	0	0	0	0		0	0	0	1	1	0
Tf_S1_4367711	1	58.5	4367711	NA	A	-	0	2	0	0	0	0	0	0		0	0	0	1	1	0
Tf_S1_4367745	1	58.6	4367745	NA	C	T	1	0	0	0	0	0	1	0		0	0	0	0	0	0
Tf_S1_4482063	1	58.8	4482063	NA	C	A	1	0	0	0	0	0	0	1		0	0	0	0	0	0
Tf_Tl_S1_4561512_S1_5232848	1	60.1	4561512	5232848	G	C	1	1	0	1	0	0	0	0		1	0	0	0	0	0
Tf_Tl_S1_4586909_S1_5259222	1	61.1	4586909	5259222	G	T	0	1	0	0	0	0	0	0		0	0	0	0	1	0
Tl_S1_5259234	1	61.1	NA	5259234	G	C	2	1	1	0	1	0	0	0		0	0	0	0	1	0
Tf_S1_4586921	1	61.1	4586921	NA	G	C	2	1	1	0	1	0	0	0		0	0	0	0	1	0
Tf_Tl_S1_4586945_S1_5259258	1	61.1	4586945	5259258	T	C	0	1	0	0	0	0	0	0		0	0	1	0	0	0
Tf_Tl_S1_4589965_S1_5262221	1	61.1	4589965	5262221	C	A	1	0	0	0	0	1	0	0		0	0	0	0	0	0
Tf_Tl_S1_4594935_S1_5267719	1	61.1	4594935	5267719	A	G	1	1	0	0	0	0	1	0		0	0	0	1	0	0
Tf_Tl_S1_4594940_S1_5267724	1	61.1	4594940	5267724	G	C	1	0	0	0	0	0	0	1		0	0	0	0	0	0
Tl_S1_5268161	1	61.1	NA	5268161	G	T	2	1	0	1	0	1	0	0		1	0	0	0	0	0
Tf_S1_4595377	1	61.1	4595377	NA	G	T	2	1	0	1	0	1	0	0		1	0	0	0	0	0
Tf_Tl_S1_4630785_S1_5291733	1	61.2	4630785	5291733	G	T	0	1	0	0	0	0	0	0		0	0	1	0	0	0
Tf_Tl_S1_4632458_S1_5293327	1	61.2	4632458	5293327	G	T	0	1	0	0	0	0	0	0		0	0	1	0	0	0
Tf_Tl_S1_4670573_S1_5339069	1	61.4	4670573	5339069	A	G	2	0	1	0	1	0	0	0		0	0	0	0	0	0
Tf_Tl_S1_4681590_S1_5350417	1	61.4	4681590	5350417	T	C	2	2	0	1	0	0	0	1		1	1	0	0	0	0
Tf_Tl_S1_4681598_S1_5350425	1	61.4	4681598	5350425	G	A	0	2	0	0	0	0	0	0		0	0	1	0	1	0
Tf_Tl_S1_4706832_S1_5378381	1	61.4	4706832	5378381	A	T	1	0	0	0	0	1	0	0		0	0	0	0	0	0
Tf_Tl_S1_4706839_S1_5378388	1	61.8	4706839	5378388	G	A	2	0	1	0	1	0	0	0		0	0	0	0	0	0
Tf_Tl_S1_4706850_S1_5378399	1	61.8	4706850	5378399	C	A	0	1	0	0	0	0	0	0		0	0	0	0	0	1
Tf_Tl_S1_4706851_S1_5378400	1	61.8	4706851	5378400	T	C	1	0	0	0	0	0	1	0		0	0	0	0	0	0
Tf_Tl_S1_4706853_S1_5378402	1	61.8	4706853	5378402	A	T	0	1	0	0	0	0	0	0		0	0	0	0	0	1
Tf_Tl_S1_4706863_S1_5378412	1	61.8	4706863	5378412	A	G	2	1	1	0	1	0	0	0		0	0	0	0	0	1
Tf_S1_4719489	1	61.8	4719489	NA	G	A	2	0	1	0	1	0	0	0		0	0	0	0	0	0
Tl_S1_5389389	1	61.8	NA	5389389	G	A	2	0	1	0	1	0	0	0		0	0	0	0	0	0
Tf_S1_4720268	1	61.9	4720268	NA	C	T	2	0	1	0	1	0	0	0		0	0	0	0	0	0
Tf_Tl_S1_4723247_S1_5393300	1	61.9	4723247	5393300	T	-	1	0	0	0	0	0	1	0		0	0	0	0	0	0
Tf_Tl_S1_4723264_S1_5393316	1	61.9	4723264	5393316	C	A	1	0	0	0	0	0	1	0		0	0	0	0	0	0
Tf_Tl_S1_4723795_S1_5393840	1	62.1	4723795	5393840	T	C	0	1	0	0	0	0	0	0		0	0	0	0	0	1
Tf_Tl_S1_4726320_S1_5396581	1	62.1	4726320	5396581	C	T	1	1	0	0	0	0	1	0		0	0	1	0	0	0
Tf_Tl_S1_4726321_S1_5396582	1	62.1	4726321	5396582	C	T	2	1	0	1	0	0	0	1		1	0	0	0	0	0
Tf_Tl_S1_4741914_S1_5413201	1	62.3	4741914	5413201	A	-	3	1	1	0	1	1	0	0		0	1	0	0	0	0
Tf_Tl_S1_4741921_S1_5413208	1	62.3	4741921	5413208	G	A	0	1	0	0	0	0	0	0		0	0	0	1	0	0
Tf_Tl_S1_4741961_S1_5413248	1	62.3	4741961	5413248	G	A	0	1	0	0	0	0	0	0		0	0	0	0	0	1
Tf_Tl_S1_4741966_S1_5413253	1	62.3	4741966	5413253	G	A	3	1	1	0	1	1	0	0		0	1	0	0	0	0
Tf_Tl_S1_4747277_S1_5418855	1	62.5	4747277	5418855	C	T	1	1	0	0	0	0	0	1		0	0	0	0	0	1
Tf_Tl_S1_4795284_S1_5482365	1	62.5	4795284	5482365	A	T	0	1	0	0	0	0	0	0		0	0	1	0	0	0
Tf_Tl_S1_4826898_S1_5570702	1	63.2	4826898	5570702	T	A	0	1	0	0	0	0	0	0		0	0	1	0	0	0
Tf_S1_4958736	1	63.2	4958736	NA	A	T	0	1	0	0	0	0	0	0		0	0	1	0	0	0
Tf_S1_4958739	1	63.2	4958739	NA	A	-	0	1	0	0	0	0	0	0		0	0	1	0	0	0
Tf_S1_4960409	1	63.6	4960409	NA	T	-	2	0	1	0	1	0	0	0		0	0	0	0	0	0
Tf_Tl_S1_5110831_S1_25893353	1	64.6	5110831	25893353	C	T	1	0	0	0	0	0	1	0		0	0	0	0	0	0
Tf_Tl_S1_5110833_S1_25893351	1	64.6	5110833	25893351	G	A	0	1	0	0	0	0	0	0		0	0	1	0	0	0
Tf_S1_5116267	1	64.6	5116267	NA	C	T	1	0	0	0	0	0	1	0		0	0	0	0	0	0
Tf_S1_5137460	1	64.6	5137460	NA	C	T	0	1	0	0	0	0	0	0		0	0	1	0	0	0
Tl_S1_25844999	1	64.8	NA	25844999	G	T	1	0	0	0	0	0	0	1		0	0	0	0	0	0
Tf_S1_5156964	1	64.8	5156964	NA	G	A	0	1	0	0	0	0	0	0		0	0	1	0	0	0
Tf_S1_5205129	1	64.8	5205129	NA	T	A	0	1	0	0	0	0	0	0		1	0	0	0	0	0
Tf_S1_5205134	1	64.8	5205134	NA	G	A	1	0	0	0	0	0	1	0		0	0	0	0	0	0
Tf_S1_5205135	1	64.8	5205135	NA	G	A	1	0	0	0	0	0	1	0		0	0	0	0	0	0
Tl_S1_25761800	1	64.8	NA	25761800	C	T	1	0	0	0	0	0	1	0		0	0	0	0	0	0
Tl_S1_25761806	1	64.8	NA	25761806	A	T	0	1	0	0	0	0	0	0		1	0	0	0	0	0
Tl_S1_25822715	1	64.8	NA	25822715	C	T	0	1	0	0	0	0	0	0		0	0	1	0	0	0
Tl_S1_25822734	1	65.1	NA	25822734	T	C	0	2	0	0	0	0	0	0		0	0	0	1	1	0
Tf_Tl_S1_5503750_S1_25478044	1	65.5	5503750	25478044	A	G	1	0	0	0	0	0	0	1		0	0	0	0	0	0
Tf_S1_5503773	1	65.5	5503773	NA	T	-	2	3	1	0	0	0	1	0		0	0	0	1	1	1
Tl_S1_25478054	1	65.5	NA	25478054	A	-	2	3	1	0	0	0	1	0		0	0	0	1	1	1
Tf_Tl_S1_5503776_S1_25478051	1	65.5	5503776	25478051	T	-	1	0	0	0	0	0	1	0		0	0	0	0	0	0
Tf_Tl_S1_5503779_S1_25478048	1	65.5	5503779	25478048	G	T	1	0	0	0	0	0	0	1		0	0	0	0	0	0
Tf_Tl_S1_5503780_S1_25478047	1	65.5	5503780	25478047	A	G	1	0	0	0	0	0	0	1		0	0	0	0	0	0
Tf_S1_5506848	1	65.8	5506848	NA	A	-	1	0	1	0	0	0	0	0		0	0	0	0	0	0
Tf_S1_5506865	1	65.8	5506865	NA	C	G	1	0	1	0	0	0	0	0		0	0	0	0	0	0
Tf_Tl_S1_5508507_S1_25473253	1	65.8	5508507	25473253	T	C	1	0	0	0	0	0	0	1		0	0	0	0	0	0
Tf_Tl_S1_5508508_S1_25473252	1	65.8	5508508	25473252	T	C	0	1	0	0	0	0	0	0		0	0	1	0	0	0
Tf_Tl_S1_5530342_S1_25451257	1	65.8	5530342	25451257	T	A	1	0	1	0	0	0	0	0		0	0	0	0	0	0
Tf_Tl_S1_5530366_S1_25451228	1	65.8	5530366	25451228	G	C	1	0	0	0	0	0	1	0		0	0	0	0	0	0
Tf_Tl_S1_5530367_S1_25451232	1	65.8	5530367	25451232	G	T	1	0	0	0	0	0	1	0		0	0	0	0	0	0
Tf_Tl_S1_5530373_S1_25451226	1	65.8	5530373	25451226	C	-	1	0	0	0	0	0	1	0		0	0	0	0	0	0
Tf_Tl_S1_5530374_S1_25451225	1	65.8	5530374	25451225	C	G	1	0	0	0	0	0	1	0		0	0	0	0	0	0
Tf_Tl_S1_5564029_S1_25408097	1	66.3	5564029	25408097	-	T	1	0	1	0	0	0	0	0		0	0	0	0	0	0
Tf_Tl_S1_5564037_S1_25408089	1	66.3	5564037	25408089	G	C	0	1	0	0	0	0	0	0		0	0	0	1	0	0
Tf_Tl_S1_5564053_S1_25408073	1	66.3	5564053	25408073	A	-	1	0	1	0	0	0	0	0		0	0	0	0	0	0
Tf_Tl_S1_5635272_S1_25318322	1	66.3	5635272	25318322	G	A	1	0	0	0	0	0	1	0		0	0	0	0	0	0
Tf_Tl_S1_5665420_S1_25279814	1	67.6	5665420	25279814	A	G	0	1	0	0	0	0	0	0		0	1	0	0	0	0
Tf_S1_5675087	1	67.6	5675087	NA	-	T	2	0	0	1	0	1	0	0		0	0	0	0	0	0
Tf_S1_5675088	1	67.6	5675088	NA	-	T	2	0	0	1	0	1	0	0		0	0	0	0	0	0
Tf_S1_5675108	1	67.6	5675108	NA	A	-	2	0	0	1	0	1	0	0		0	0	0	0	0	0
Tf_S1_5675111	1	67.9	5675111	NA	A	-	1	1	0	0	1	0	0	0		1	0	0	0	0	0
Tl_S1_25264999	1	68.4	NA	25264999	T	G	1	0	1	0	0	0	0	0		0	0	0	0	0	0
Tf_S1_5739172	1	68.5	5739172	NA	A	G	0	1	0	0	0	0	0	0		0	0	1	0	0	0
Tf_S1_5741704	1	68.5	5741704	NA	C	A	1	1	0	0	1	0	0	0		1	0	0	0	0	0
Tf_Tl_S1_5760830_S1_25166726	1	68.8	5760830	25166726	T	C	1	0	1	0	0	0	0	0		0	0	0	0	0	0
Tf_Tl_S1_5760836_S1_25166720	1	68.8	5760836	25166720	A	-	1	0	1	0	0	0	0	0		0	0	0	0	0	0
Tf_S1_5777721	1	68.8	5777721	NA	T	-	0	1	0	0	0	0	0	0		0	0	0	0	1	0
Tf_S1_5777741	1	68.8	5777741	NA	A	G	0	1	0	0	0	0	0	0		0	1	0	0	0	0
Tf_S1_5844931	1	68.8	5844931	NA	A	-	0	1	0	0	0	0	0	0		0	0	1	0	0	0
Tf_S1_6048808	1	70.9	6048808	NA	G	T	1	2	1	0	0	0	0	0		0	0	0	1	0	1
Tf_S1_6048816	1	70.9	6048816	NA	T	G	1	2	1	0	0	0	0	0		0	0	0	1	0	1
Tf_Tl_S1_6057894_S1_11267122	1	71.1	6057894	11267122	C	A	1	2	1	0	0	0	0	0		0	0	0	1	0	1
Tf_Tl_S1_6084969_S1_11302645	1	71.1	6084969	11302645	A	G	3	2	0	1	0	1	0	1		0	0	1	0	1	0
Tf_S1_6104902	1	71.1	6104902	NA	-	T	1	0	1	0	0	0	0	0		0	0	0	0	0	0
Tf_Tl_S1_6104921_S1_11326795	1	71.1	6104921	11326795	A	-	1	0	1	0	0	0	0	0		0	0	0	0	0	0
Tf_Tl_S1_6104923_S1_11326797	1	71.1	6104923	11326797	T	-	1	0	1	0	0	0	0	0		0	0	0	0	0	0
Tf_Tl_S1_6104924_S1_11326798	1	71.1	6104924	11326798	G	-	1	0	1	0	0	0	0	0		0	0	0	0	0	0
Tl_S1_11326800	1	71.1	NA	11326800	A	-	1	0	1	0	0	0	0	0		0	0	0	0	0	0
Tf_S1_6123550	1	71.1	6123550	NA	G	A	1	2	0	0	0	0	1	0		0	0	1	0	0	1
Tf_S1_6123578	1	71.3	6123578	NA	A	-	3	2	0	1	0	1	0	1		0	0	1	0	1	0
Tf_S1_6127425	1	71.3	6127425	NA	T	G	0	1	0	0	0	0	0	0		0	0	0	1	0	0
Tl_S1_11350133	1	71.3	NA	11350133	T	A	1	0	1	0	0	0	0	0		0	0	0	0	0	0
Tl_S1_11350135	1	71.3	NA	11350135	T	G	0	1	0	0	0	0	0	0		0	0	0	1	0	0
Tf_Tl_S1_6138568_S1_11363219	1	71.3	6138568	11363219	C	T	1	0	1	0	0	0	0	0		0	0	0	0	0	0
Tf_Tl_S1_6175036_S1_11395315	1	71.3	6175036	11395315	G	A	1	0	0	0	0	0	1	0		0	0	0	0	0	0
Tf_Tl_S1_6222118_S1_11454428	1	71.7	6222118	11454428	C	A	0	1	0	0	0	0	0	0		0	0	0	0	1	0
Tl_S1_11463905	1	71.7	NA	11463905	T	G	3	1	0	1	0	1	0	1		0	0	1	0	0	0
Tf_Tl_S1_6288863_S1_11524986	1	71.7	6288863	11524986	T	A	0	1	0	0	0	0	0	0		0	0	0	1	0	0
Tf_Tl_S1_6290507_S1_11526611	1	71.7	6290507	11526611	G	A	0	1	0	0	0	0	0	0		0	1	0	0	0	0
Tf_Tl_S1_6290780_S1_11526884	1	71.7	6290780	11526884	C	G	1	0	0	0	0	0	1	0		0	0	0	0	0	0
Tf_Tl_S1_6304945_S1_11538337	1	71.7	6304945	11538337	A	T	0	1	0	0	0	0	0	0		0	0	0	1	0	0
Tl_S1_11582312	1	71.9	NA	11582312	C	T	0	1	0	0	0	0	0	0		0	0	0	1	0	0
Tf_Tl_S1_6401798_S1_11613529	1	72.1	6401798	11613529	A	C	2	0	1	0	0	0	1	0		0	0	0	0	0	0
Tf_Tl_S1_6401809_S1_11613540	1	72.1	6401809	11613540	G	T	0	1	0	0	0	0	0	0		0	0	0	0	1	0
Tf_Tl_S1_6401814_S1_11613545	1	72.1	6401814	11613545	G	A	2	0	1	0	0	0	1	0		0	0	0	0	0	0
Tf_Tl_S1_6446324_S1_11671360	1	72.5	6446324	11671360	C	T	0	1	0	0	0	0	0	0		0	0	0	1	0	0
Tf_Tl_S1_6448762_S1_11673745	1	72.5	6448762	11673745	-	A	3	0	0	1	0	1	0	1		0	0	0	0	0	0
Tf_Tl_S1_6448793_S1_11673776	1	72.5	6448793	11673776	A	T	3	0	0	1	0	1	0	1		0	0	0	0	0	0
Tf_Tl_S1_6448808_S1_11673791	1	72.5	6448808	11673791	A	-	3	0	0	1	0	1	0	1		0	0	0	0	0	0
Tf_Tl_S1_6452832_S1_11676918	1	74.1	6452832	11676918	G	C	3	1	1	0	1	0	1	0		1	0	0	0	0	0
Tf_Tl_S1_6452875_S1_11676961	1	74.1	6452875	11676961	-	C	3	1	1	0	1	0	1	0		1	0	0	0	0	0
Tf_S1_6452877	1	74.1	6452877	NA	T	A	3	1	1	0	1	0	1	0		1	0	0	0	0	0
Tl_S1_11676963	1	74.1	NA	11676963	T	A	3	1	1	0	1	0	1	0		1	0	0	0	0	0
Tf_S1_6452878	1	74.1	6452878	NA	C	-	3	1	1	0	1	0	1	0		1	0	0	0	0	0
Tl_S1_11676964	1	74.1	NA	11676964	C	-	3	1	1	0	1	0	1	0		1	0	0	0	0	0
Tf_Tl_S1_6475236_S1_11749561	1	76.1	6475236	11749561	C	A	1	1	0	0	1	0	0	0		1	0	0	0	0	0
Tf_Tl_S1_6475712_S1_11750037	1	76.1	6475712	11750037	A	C	1	1	0	0	1	0	0	0		1	0	0	0	0	0
Tl_S1_11751005	1	76.1	NA	11751005	C	T	1	1	0	0	1	0	0	0		1	0	0	0	0	0
Tf_S1_6476694	1	76.1	6476694	NA	C	T	1	1	0	0	1	0	0	0		1	0	0	0	0	0
Tf_S1_6476712	1	76.1	6476712	NA	C	G	1	1	0	0	1	0	0	0		1	0	0	0	0	0
Tf_Tl_S1_6477292_S1_11751601	1	76.3	6477292	11751601	G	C	1	1	0	0	1	0	0	0		1	0	0	0	0	0
Tl_S1_11808287	1	76.7	NA	11808287	T	C	5	1	1	1	0	1	1	1		0	0	1	0	0	0
Tl_S1_11808311	1	76.7	NA	11808311	C	T	5	1	1	1	0	1	1	1		0	0	1	0	0	0
Tl_S1_11884053	1	76.7	NA	11884053	T	C	0	2	0	0	0	0	0	0		0	0	0	1	1	0
Tf_S1_6535051	1	76.7	6535051	NA	T	C	5	1	1	1	0	1	1	1		0	0	1	0	0	0
Tf_S1_6535075	1	76.7	6535075	NA	C	T	5	1	1	1	0	1	1	1		0	0	1	0	0	0
Tf_S1_6607815	1	76.7	6607815	NA	-	T	2	0	1	0	0	0	1	0		0	0	0	0	0	0
Tf_S1_6607824	1	76.7	6607824	NA	C	G	1	1	0	0	1	0	0	0		1	0	0	0	0	0
Tl_S1_11905282	1	76.7	NA	11905282	-	T	2	0	1	0	0	0	1	0		0	0	0	0	0	0
Tl_S1_11905291	1	76.7	NA	11905291	C	G	1	1	0	0	1	0	0	0		1	0	0	0	0	0
Tf_Tl_S1_6607827_S1_11905294	1	76.7	6607827	11905294	C	A	0	1	0	0	0	0	0	0		0	0	0	0	0	1
Tf_Tl_S1_6607861_S1_11905328	1	76.7	6607861	11905328	T	C	0	2	0	0	0	0	0	0		0	0	0	1	1	0
Tf_S1_6607872	1	76.7	6607872	NA	A	-	2	0	1	0	0	0	1	0		0	0	0	0	0	0
Tl_S1_11905339	1	76.7	NA	11905339	A	-	2	0	1	0	0	0	1	0		0	0	0	0	0	0
Tf_Tl_S1_6725642_S1_11982743	1	76.9	6725642	11982743	A	T	1	2	0	0	1	0	0	0		1	0	0	0	0	1
Tf_Tl_S1_6725674_S1_11982775	1	76.9	6725674	11982775	C	T	2	0	0	1	0	0	0	1		0	0	0	0	0	0
Tf_Tl_S1_6725675_S1_11982776	1	76.9	6725675	11982776	G	A	1	1	0	0	1	0	0	0		1	0	0	0	0	0
Tf_Tl_S1_6767172_S1_12020855	1	77.1	6767172	12020855	A	T	0	1	0	0	0	0	0	0		0	0	0	1	0	0
Tf_S1_6782203	1	77.1	6782203	NA	G	A	1	1	0	0	1	0	0	0		1	0	0	0	0	0
Tf_S1_6868766	1	77.4	6868766	NA	T	-	0	1	0	0	0	0	0	0		0	0	0	1	0	0
Tl_S1_12097925	1	77.4	NA	12097925	A	G	0	1	0	0	0	0	0	0		0	0	0	0	1	0
Tl_S1_12108904	1	77.4	NA	12108904	T	-	0	1	0	0	0	0	0	0		0	0	0	1	0	0
Tl_S1_12108906	1	77.4	NA	12108906	G	C	0	1	0	0	0	0	0	0		0	0	0	1	0	0
Tl_S1_12108907	1	77.4	NA	12108907	G	C	0	1	0	0	0	0	0	0		0	0	0	1	0	0
Tl_S1_12108909	1	77.4	NA	12108909	T	A	0	1	0	0	0	0	0	0		0	0	0	1	0	0
Tl_S1_12108913	1	77.4	NA	12108913	A	T	0	1	0	0	0	0	0	0		0	0	0	1	0	0
Tf_Tl_S1_6872837_S1_12114057	1	77.4	6872837	12114057	C	T	0	1	0	0	0	0	0	0		0	0	0	0	0	1
Tl_S1_12114058	1	77.5	NA	12114058	G	C	3	1	0	1	1	0	0	1		1	0	0	0	0	0
Tf_S1_6872838	1	77.5	6872838	NA	G	C	3	1	0	1	1	0	0	1		1	0	0	0	0	0
Tf_Tl_S1_6874875_S1_12116811	1	77.5	6874875	12116811	C	T	1	3	0	0	1	0	0	0		1	0	0	1	0	1
Tf_Tl_S1_6874905_S1_12116841	1	77.9	6874905	12116841	C	T	0	1	0	0	0	0	0	0		0	0	0	0	1	0
Tf_S1_7043965	1	78	7043965	NA	A	C	1	1	0	0	1	0	0	0		1	0	0	0	0	0
Tf_S1_7043969	1	78.2	7043969	NA	G	C	0	2	0	0	0	0	0	0		0	0	0	1	1	0
Tf_S1_7074646	1	78.2	7074646	NA	A	G	0	1	0	0	0	0	0	0		0	0	0	1	0	0
Tf_S1_7074653	1	78.2	7074653	NA	G	C	0	1	0	0	0	0	0	0		0	0	0	1	0	0
Tf_S1_7127737	1	78.2	7127737	NA	T	A	2	0	1	0	0	0	1	0		0	0	0	0	0	0
Tf_S1_7127742	1	78.2	7127742	NA	C	T	2	4	0	0	1	1	0	0		1	1	0	1	1	0
Tl_S1_12389218	1	78.2	NA	12389218	T	A	2	0	1	0	0	0	1	0		0	0	0	0	0	0
Tl_S1_12389223	1	78.2	NA	12389223	C	T	2	4	0	0	1	1	0	0		1	1	0	1	1	0
Tf_S1_7127750	1	78.2	7127750	NA	G	A	2	2	0	1	0	0	0	1		0	0	1	0	0	1
Tl_S1_12389231	1	78.2	NA	12389231	G	A	2	2	0	1	0	0	0	1		0	0	1	0	0	1
Tf_Tl_S1_7370031_S1_12541417	1	78.2	7370031	12541417	G	C	0	1	0	0	0	0	0	0		0	1	0	0	0	0
Tf_Tl_S1_7483434_S1_12668753	1	78.7	7483434	12668753	C	T	0	1	0	0	0	0	0	0		0	1	0	0	0	0
Tf_Tl_S1_7546366_S1_12827216	1	78.7	7546366	12827216	C	T	0	1	0	0	0	0	0	0		0	1	0	0	0	0
Tf_Tl_S1_7546387_S1_12827237	1	78.7	7546387	12827237	G	A	0	1	0	0	0	0	0	0		0	1	0	0	0	0
Tf_Tl_S1_9882653_S1_18652215	1	78.8	9882653	18652215	T	C	3	0	1	0	0	0	1	1		0	0	0	0	0	0
Tf_S1_9286542	1	79	9286542	NA	G	C	3	3	0	1	1	1	0	0		1	1	0	0	1	0
Tf_Tl_S1_10301368_S1_16827469	1	79	10301368	16827469	C	A	1	1	0	0	0	1	0	0		0	0	0	0	1	0
Tf_Tl_S1_10223021_S1_16891117	1	79	10223021	16891117	T	G	3	1	1	0	0	0	1	1		0	0	1	0	0	0
Tf_S1_11309678	1	79	11309678	NA	G	A	2	1	0	1	0	1	0	0		0	0	0	0	1	0
Tf_S1_10558442	1	79	10558442	NA	A	C	2	4	0	0	1	1	0	0		1	1	0	0	1	1
Tf_S1_10558439	1	79	10558439	NA	G	A	2	4	0	0	1	1	0	0		1	1	0	0	1	1
Tf_S1_10558431	1	79	10558431	NA	-	T	2	4	0	0	1	1	0	0		1	1	0	0	1	1
Tf_S1_9092231	1	79	9092231	NA	G	C	1	4	0	0	0	1	0	0		0	1	0	1	1	1
Tf_Tl_S1_8783283_S1_19492916	1	79.1	8783283	19492916	T	G	2	4	0	0	1	1	0	0		1	1	0	0	1	1
Tf_S1_11327252	1	79.1	11327252	NA	G	T	2	4	0	1	0	1	0	0		0	0	1	1	1	1
Tf_S1_11621120	1	79.1	11621120	NA	G	T	0	1	0	0	0	0	0	0		0	1	0	0	0	0
Tf_S1_8398636	1	79.1	8398636	NA	A	G	3	1	1	0	0	0	1	1		0	0	0	0	0	1
Tf_S1_10665651	1	79.1	10665651	NA	C	T	0	1	0	0	0	0	0	0		0	1	0	0	0	0
Tf_S1_9286531	1	79.1	9286531	NA	-	T	2	3	0	1	0	1	0	0		0	0	0	1	1	1
Tf_S1_9286533	1	79.1	9286533	NA	C	T	2	3	0	1	0	1	0	0		0	0	0	1	1	1
Tf_S1_9286506	1	79.1	9286506	NA	G	A	2	3	0	1	0	1	0	0		0	0	0	1	1	1
Tf_S1_9714283	1	79.2	9714283	NA	G	C	0	1	0	0	0	0	0	0		0	1	0	0	0	0
Tf_S1_9091136	1	79.2	9091136	NA	T	A	1	4	0	0	0	1	0	0		0	1	0	1	1	1
Tf_S1_9091115	1	79.2	9091115	NA	T	C	1	4	0	0	0	1	0	0		0	1	0	1	1	1
Tf_S1_9091119	1	79.2	9091119	NA	A	G	1	4	0	0	0	1	0	0		0	1	0	1	1	1
Tf_S1_9714250	1	79.2	9714250	NA	G	-	0	1	0	0	0	0	0	0		0	1	0	0	0	0
Tf_Tl_S1_9875552_S1_18643490	1	79.2	9875552	18643490	G	A	1	2	0	0	1	0	0	0		1	1	0	0	0	0
Tf_Tl_S1_9112460_S1_16983690	1	79.2	9112460	16983690	-	C	1	1	0	0	0	1	0	0		0	0	0	0	1	0
Tf_Tl_S1_9112413_S1_16983643	1	79.2	9112413	16983643	A	C	1	1	0	0	0	1	0	0		0	0	0	0	1	0
Tl_S1_20335929	1	79.3	NA	20335929	T	-	2	4	0	0	1	1	0	0		1	1	0	0	1	1
Tl_S1_20335930	1	79.3	NA	20335930	C	A	2	4	0	0	1	1	0	0		1	1	0	0	1	1
Tl_S1_20335951	1	79.3	NA	20335951	C	T	2	4	0	0	1	1	0	0		1	1	0	0	1	1
Tl_S1_20335959	1	79.3	NA	20335959	-	A	2	4	0	0	1	1	0	0		1	1	0	0	1	1
Tf_Tl_S1_10308238_S1_16821539	1	79.4	10308238	16821539	C	A	1	1	0	0	0	1	0	0		0	0	0	0	1	0
Tf_S1_9286493	1	79.4	9286493	NA	A	-	1	1	0	0	0	1	0	0		0	0	0	0	1	0
Tf_S1_10742828	1	79.4	10742828	NA	G	A	0	1	0	0	0	0	0	0		0	0	1	0	0	0
Tf_S1_9460319	1	79.4	9460319	NA	C	G	0	1	0	0	0	0	0	0		0	0	0	1	0	0
Tf_Tl_S1_10308252_S1_16821525	1	79.4	10308252	16821525	G	A	1	2	0	0	0	1	0	0		0	0	1	0	1	0
Tf_S1_9092221	1	79.4	9092221	NA	T	A	3	1	1	0	0	0	1	1		0	0	1	0	0	0
Tf_Tl_S1_10210221_S1_16900604	1	79.4	10210221	16900604	G	A	0	2	0	0	0	0	0	0		0	0	0	1	0	1
Tf_S1_8398639	1	79.4	8398639	NA	T	C	1	1	0	0	0	1	0	0		0	0	0	0	1	0
Tf_Tl_S1_8478032_S1_19183314	1	79.6	8478032	19183314	G	A	0	1	0	0	0	0	0	0		0	0	0	0	0	1
Tf_S1_9109041	1	79.6	9109041	NA	G	T	2	4	0	1	1	0	0	0		1	1	0	1	0	1
Tf_Tl_S1_8404669_S1_13046351	1	79.6	8404669	13046351	G	A	4	2	1	0	0	1	1	1		0	0	0	0	1	1
Tl_S1_13290105	1	79.6	NA	13290105	G	T	0	1	0	0	0	0	0	0		0	1	0	0	0	0
Tf_Tl_S1_7855317_S1_15431127	1	79.6	7855317	15431127	C	T	0	1	0	0	0	0	0	0		0	0	0	1	0	0
Tf_S1_11313030	1	80.1	11313030	NA	C	A	1	1	0	0	1	0	0	0		1	0	0	0	0	0
Tf_S1_7855268	1	80.1	7855268	NA	T	C	3	2	0	0	1	0	1	1		1	1	0	0	0	0
Tl_S1_15431176	1	80.1	NA	15431176	A	G	3	2	0	0	1	0	1	1		1	1	0	0	0	0
Tf_Tl_S1_11293526_S1_17744343	1	80.1	11293526	17744343	C	T	1	1	0	0	1	0	0	0		1	0	0	0	0	0
Tl_S1_17801775	1	80.2	NA	17801775	T	G	1	0	0	1	0	0	0	0		0	0	0	0	0	0
Tl_S1_18217397	1	80.2	NA	18217397	G	-	0	1	0	0	0	0	0	0		0	1	0	0	0	0
Tl_S1_18217432	1	80.2	NA	18217432	G	C	0	1	0	0	0	0	0	0		0	1	0	0	0	0
Tl_S1_14871394	1	80.5	NA	14871394	C	G	1	0	0	1	0	0	0	0		0	0	0	0	0	0
Tf_Tl_S1_8086109_S1_24717998	1	80.5	8086109	24717998	C	G	0	1	0	0	0	0	0	0		0	1	0	0	0	0
Tf_Tl_S1_11419833_S1_17653029	1	80.5	11419833	17653029	G	A	0	1	0	0	0	0	0	0		0	0	0	1	0	0
Tl_S1_15179998	1	80.5	NA	15179998	G	A	0	1	0	0	0	0	0	0		0	0	1	0	0	0
Tf_Tl_S1_9882638_S1_18652200	1	80.5	9882638	18652200	G	A	1	2	0	0	0	1	0	0		0	0	0	1	1	0
Tf_S1_8071564	1	80.5	8071564	NA	-	C	0	1	0	0	0	0	0	0		0	1	0	0	0	0
Tf_Tl_S1_8086101_S1_24718006	1	80.5	8086101	24718006	C	T	0	1	0	0	0	0	0	0		0	0	1	0	0	0
Tf_S1_11313038	1	80.7	11313038	NA	C	A	1	3	0	0	1	0	0	0		1	1	1	0	0	0
Tl_S1_17680932	1	80.7	NA	17680932	C	A	2	4	0	1	0	1	0	0		0	0	1	1	1	1
Tl_S1_17622904	1	80.7	NA	17622904	G	A	0	1	0	0	0	0	0	0		0	0	1	0	0	0
Tf_Tl_S1_10315893_S1_16818182	1	80.9	10315893	16818182	C	A	0	1	0	0	0	0	0	0		0	0	1	0	0	0
Tf_Tl_S1_7976399_S1_15303409	1	80.9	7976399	15303409	C	T	0	1	0	0	0	0	0	0		0	0	0	1	0	0
Tf_Tl_S1_7980185_S1_15299877	1	81	7980185	15299877	G	T	0	1	0	0	0	0	0	0		0	0	1	0	0	0
Tf_S1_8071545	1	81	8071545	NA	T	G	1	0	0	1	0	0	0	0		0	0	0	0	0	0
Tf_S1_8071549	1	81.2	8071549	NA	A	G	2	2	1	1	0	0	0	0		0	1	1	0	0	0
Tf_S1_8071558	1	81.2	8071558	NA	A	G	0	1	0	0	0	0	0	0		0	0	1	0	0	0
Tf_S1_8398678	1	81.4	8398678	NA	A	G	4	2	1	0	0	1	1	1		0	0	0	0	1	1
Tf_S1_8071563	1	81.4	8071563	NA	C	A	1	1	1	0	0	0	0	0		0	1	0	0	0	0
Tl_S1_17714853	1	81.4	NA	17714853	C	T	1	3	0	0	1	0	0	0		1	1	1	0	0	0
Tf_Tl_S1_11293533_S1_17744336	1	81.4	11293533	17744336	C	T	1	3	0	0	1	0	0	0		1	1	1	0	0	0
Tf_S1_11159390	1	81.7	11159390	NA	A	C	1	0	0	1	0	0	0	0		0	0	0	0	0	0
Tl_S1_16964694	1	81.7	NA	16964694	G	C	1	4	0	0	0	1	0	0		0	1	0	1	1	1
Tl_S1_16964698	1	81.7	NA	16964698	G	T	4	1	1	1	0	0	1	1		0	0	1	0	0	0
Tf_S1_11464904	1	81.7	11464904	NA	C	T	1	0	0	1	0	0	0	0		0	0	0	0	0	0
Tf_Tl_S1_9715960_S1_18219115	1	81.7	9715960	18219115	C	T	1	1	0	0	1	0	0	0		1	0	0	0	0	0
Tl_S1_18973663	1	81.7	NA	18973663	T	A	0	1	0	0	0	0	0	0		0	0	1	0	0	0
Tf_S1_11422488	1	81.7	11422488	NA	C	A	0	1	0	0	0	0	0	0		0	0	1	0	0	0
Tf_Tl_S1_10303460_S1_16825367	1	81.7	10303460	16825367	G	A	1	1	0	1	0	0	0	0		0	0	1	0	0	0
Tf_Tl_S1_9418877_S1_17268386	1	81.7	9418877	17268386	G	A	1	0	0	1	0	0	0	0		0	0	0	0	0	0
Tf_Tl_S1_10301367_S1_16827470	1	81.7	10301367	16827470	T	C	1	0	0	1	0	0	0	0		0	0	0	0	0	0
Tf_S1_9092235	1	81.7	9092235	NA	G	T	4	1	1	1	0	0	1	1		0	0	1	0	0	0
Tf_S1_10857174	1	81.7	10857174	NA	A	C	0	1	0	0	0	0	0	0		0	0	0	1	0	0
Tl_S1_16964684	1	81.7	NA	16964684	T	A	3	1	1	0	0	0	1	1		0	0	1	0	0	0
Tf_Tl_S1_9092228_S1_16964691	1	81.7	9092228	16964691	G	T	1	0	0	1	0	0	0	0		0	0	0	0	0	0
Tl_S1_16922125	1	81.7	NA	16922125	C	T	1	1	0	0	1	0	0	0		1	0	0	0	0	0
Tl_S1_16922144	1	81.7	NA	16922144	A	G	1	1	0	0	1	0	0	0		1	0	0	0	0	0
Tl_S1_16963762	1	81.8	NA	16963762	T	C	1	4	0	0	0	1	0	0		0	1	0	1	1	1
Tl_S1_16963766	1	81.8	NA	16963766	A	G	1	4	0	0	0	1	0	0		0	1	0	1	1	1
Tl_S1_16963783	1	81.8	NA	16963783	T	A	1	4	0	0	0	1	0	0		0	1	0	1	1	1
Tf_Tl_S1_10315890_S1_16818192	1	81.8	10315890	16818192	T	A	1	0	0	1	0	0	0	0		0	0	0	0	0	0
Tf_Tl_S1_10210177_S1_16900648	1	81.8	10210177	16900648	A	G	1	0	0	1	0	0	0	0		0	0	0	0	0	0
Tf_S1_10315928	1	81.8	10315928	NA	G	C	1	2	0	1	0	0	0	0		0	0	1	0	1	0
Tl_S1_16818154	1	81.8	NA	16818154	C	G	1	2	0	1	0	0	0	0		0	0	1	0	1	0
Tf_Tl_S1_9970122_S1_18686490	1	82.2	9970122	18686490	C	T	1	1	0	0	1	0	0	0		1	0	0	0	0	0
Tf_S1_11523024	1	82.2	11523024	NA	G	A	0	2	0	0	0	0	0	0		0	0	1	0	0	1
Tf_Tl_S1_14054062_S1_15749071	1	82.3	14054062	15749071	G	A	0	1	0	0	0	0	0	0		0	0	0	1	0	0
Tf_Tl_S1_14294699_S1_15953608	1	82.8	14294699	15953608	A	G	1	1	1	0	0	0	0	0		0	0	0	1	0	0
Tf_Tl_S1_14294717_S1_15953626	1	82.8	14294717	15953626	T	C	1	1	0	0	1	0	0	0		1	0	0	0	0	0
Tf_Tl_S1_14295159_S1_15954068	1	82.8	14295159	15954068	C	T	1	0	1	0	0	0	0	0		0	0	0	0	0	0
Tf_Tl_S1_14430343_S1_16254824	1	82.8	14430343	16254824	A	G	1	0	0	1	0	0	0	0		0	0	0	0	0	0
Tf_Tl_S1_14430826_S1_16255296	1	82.9	14430826	16255296	A	G	1	0	0	1	0	0	0	0		0	0	0	0	0	0
Tf_Tl_S1_14443390_S1_16285171	1	83.1	14443390	16285171	A	T	1	0	0	1	0	0	0	0		0	0	0	0	0	0
Tf_S1_14565715	1	83.1	14565715	NA	A	C	4	2	1	0	1	0	1	1		1	1	0	0	0	0
Tf_Tl_S1_14642435_S1_24118134	1	83.3	14642435	24118134	C	T	2	1	1	0	0	1	0	0		0	0	0	1	0	0
Tf_Tl_S1_14642439_S1_24118138	1	83.3	14642439	24118138	A	G	1	0	0	0	0	1	0	0		0	0	0	0	0	0
Tf_Tl_S1_14642469_S1_24118168	1	83.3	14642469	24118168	G	A	2	2	1	0	0	1	0	0		0	1	0	1	0	0
Tf_Tl_S1_14644894_S1_24121706	1	83.3	14644894	24121706	G	C	0	2	0	0	0	0	0	0		0	0	0	0	1	1
Tf_Tl_S1_14644901_S1_24121713	1	83.3	14644901	24121713	T	C	3	1	0	0	1	0	1	1		1	0	0	0	0	0
Tf_Tl_S1_14644907_S1_24121719	1	83.3	14644907	24121719	G	T	3	1	0	0	1	0	1	1		1	0	0	0	0	0
Tl_S1_24122184	1	83.3	NA	24122184	T	A	1	0	1	0	0	0	0	0		0	0	0	0	0	0
Tf_S1_14645372	1	83.3	14645372	NA	T	A	1	0	1	0	0	0	0	0		0	0	0	0	0	0
Tf_Tl_S1_14647749_S1_24124549	1	83.3	14647749	24124549	A	-	1	3	0	1	0	0	0	0		0	1	0	0	1	1
Tf_Tl_S1_14647839_S1_24124639	1	83.3	14647839	24124639	G	A	1	2	0	1	0	0	0	0		0	0	0	0	1	1
Tf_Tl_S1_15050127_S1_20750406	1	84.7	15050127	20750406	C	T	0	1	0	0	0	0	0	0		0	1	0	0	0	0
Tf_Tl_S1_15064463_S1_20767823	1	84.7	15064463	20767823	C	T	0	1	0	0	0	0	0	0		0	1	0	0	0	0
Tf_Tl_S1_11926609_S1_21330091	1	84.7	11926609	21330091	G	C	1	1	0	0	0	1	0	0		0	0	0	0	0	1
Tf_Tl_S1_11926652_S1_21330048	1	84.7	11926652	21330048	G	T	1	1	0	0	0	1	0	0		0	0	0	0	0	1
Tf_S1_11927449	1	84.7	11927449	NA	T	-	1	1	0	0	0	0	1	0		0	0	1	0	0	0
Tf_S1_11930752	1	84.8	11930752	NA	G	A	1	2	0	0	0	1	0	0		0	0	0	1	0	1
Tf_S1_11930762	1	84.9	11930762	NA	C	T	0	1	0	0	0	0	0	0		0	0	0	0	1	0
Tf_S1_11930770	1	84.9	11930770	NA	C	G	0	1	0	0	0	0	0	0		0	0	0	1	0	0
Tf_Tl_S1_12044084_S1_21399306	1	84.9	12044084	21399306	G	-	0	1	0	0	0	0	0	0		0	0	0	0	0	1
Tf_S1_12045355	1	84.9	12045355	NA	C	T	1	0	0	0	0	1	0	0		0	0	0	0	0	0
Tf_Tl_S1_12133158_S1_21506214	1	84.9	12133158	21506214	C	T	0	1	0	0	0	0	0	0		0	0	0	0	0	1
Tf_Tl_S1_12206544_S1_20778017	1	84.9	12206544	20778017	T	C	0	1	0	0	0	0	0	0		0	0	0	1	0	0
Tf_Tl_S1_12207383_S1_20778856	1	84.9	12207383	20778856	A	-	1	0	1	0	0	0	0	0		0	0	0	0	0	0
Tf_Tl_S1_12208810_S1_20780285	1	84.9	12208810	20780285	G	A	1	0	1	0	0	0	0	0		0	0	0	0	0	0
Tf_Tl_S1_12326430_S1_20937068	1	85.1	12326430	20937068	T	A	1	0	0	0	0	0	0	1		0	0	0	0	0	0
Tf_Tl_S1_12386443_S1_21019461	1	85.1	12386443	21019461	T	A	0	1	0	0	0	0	0	0		0	0	1	0	0	0
Tl_S1_21029756	1	85.1	NA	21029756	T	C	1	1	1	0	0	0	0	0		0	0	0	1	0	0
Tf_S1_12395328	1	85.1	12395328	NA	T	C	2	1	1	0	0	0	0	1		0	0	0	1	0	0
Tf_S1_12395348	1	85.1	12395348	NA	C	T	2	1	0	1	0	0	0	1		0	1	0	0	0	0
Tl_S1_21029776	1	85.1	NA	21029776	C	T	1	1	0	1	0	0	0	0		0	1	0	0	0	0
Tf_S1_12395373	1	85.1	12395373	NA	C	G	1	0	0	0	0	0	0	1		0	0	0	0	0	0
Tf_Tl_S1_12554635_S1_22431592	1	86.7	12554635	22431592	C	G	0	1	0	0	0	0	0	0		0	0	1	0	0	0
Tl_S1_22431635	1	86.7	NA	22431635	-	A	0	1	0	0	0	0	0	0		0	0	1	0	0	0
Tf_Tl_S1_12657587_S1_22354658	1	86.7	12657587	22354658	A	G	0	1	0	0	0	0	0	0		0	0	0	1	0	0
Tl_S1_22000374	1	86.7	NA	22000374	-	A	1	0	1	0	0	0	0	0		0	0	0	0	0	0
Tf_Tl_S1_12657627_S1_22354618	1	86.7	12657627	22354618	C	G	0	1	0	0	0	0	0	0		0	0	0	1	0	0
Tl_S1_22012892	1	86.7	NA	22012892	G	A	0	1	0	0	0	0	0	0		0	0	0	1	0	0
Tl_S1_22353705	1	87.2	NA	22353705	G	C	2	3	0	0	0	0	1	1		0	0	0	1	1	1
Tf_S1_12658575	1	87.2	12658575	NA	C	G	2	3	0	0	0	0	1	1		0	0	0	1	1	1
Tf_S1_12658576	1	87.2	12658576	NA	G	-	2	1	0	0	1	1	0	0		1	0	0	0	0	0
Tl_S1_22353693	1	87.2	NA	22353693	C	A	2	1	0	0	1	1	0	0		1	0	0	0	0	0
Tl_S1_22353651	1	87.2	NA	22353651	G	-	0	1	0	0	0	0	0	0		0	0	1	0	0	0
Tl_S1_22353652	1	87.2	NA	22353652	G	-	1	1	0	0	0	0	0	1		0	0	0	0	1	0
Tl_S1_22353675	1	87.2	NA	22353675	C	T	1	3	0	0	0	0	1	0		0	0	1	1	0	1
Tf_S1_12658605	1	87.2	12658605	NA	G	A	1	3	0	0	0	0	1	0		0	0	1	1	0	1
Tf_Tl_S1_12705958_S1_22297856	1	87.4	12705958	22297856	T	G	1	1	0	0	0	0	0	1		0	0	0	0	1	0
Tf_Tl_S1_12705959_S1_22297855	1	87.4	12705959	22297855	T	C	2	4	0	0	0	1	0	1		0	1	1	0	1	1
Tf_Tl_S1_12705976_S1_22297838	1	87.4	12705976	22297838	C	A	0	1	0	0	0	0	0	0		0	1	0	0	0	0
Tf_Tl_S1_12706038_S1_22297776	1	87.4	12706038	22297776	C	A	1	0	0	0	0	1	0	0		0	0	0	0	0	0
Tf_Tl_S1_12706039_S1_22297775	1	87.6	12706039	22297775	A	G	0	1	0	0	0	0	0	0		0	0	1	0	0	0
Tf_S1_12706760	1	87.7	12706760	NA	T	C	1	2	0	0	0	1	0	0		0	1	0	0	0	1
Tl_S1_22297040	1	87.7	NA	22297040	T	C	1	2	0	0	0	1	0	0		0	1	0	0	0	1
Tl_S1_22297022	1	87.7	NA	22297022	G	A	0	1	0	0	0	0	0	0		0	0	1	0	0	0
Tl_S1_22297054	1	87.7	NA	22297054	A	G	1	2	0	0	0	1	0	0		0	1	0	0	0	1
Tf_S1_12706792	1	87.7	12706792	NA	C	T	0	1	0	0	0	0	0	0		0	0	1	0	0	0
Tf_Tl_S1_12748069_S1_22248133	1	87.7	12748069	22248133	G	C	1	1	0	0	0	1	0	0		0	0	1	0	0	0
Tf_Tl_S1_12755061_S1_22235664	1	88.1	12755061	22235664	G	A	0	1	0	0	0	0	0	0		0	1	0	0	0	0
Tf_Tl_S1_12755065_S1_22235660	1	88.5	12755065	22235660	C	A	2	0	1	1	0	0	0	0		0	0	0	0	0	0
Tl_S1_21329249	1	88.5	NA	21329249	-	G	1	1	0	0	0	0	1	0		0	0	1	0	0	0
Tl_S1_21329253	1	88.5	NA	21329253	G	-	1	1	0	0	0	0	1	0		0	0	1	0	0	0
Tf_S1_12772729	1	88.5	12772729	NA	A	C	2	0	1	1	0	0	0	0		0	0	0	0	0	0
Tl_S1_22216400	1	88.5	NA	22216400	T	G	2	0	1	1	0	0	0	0		0	0	0	0	0	0
Tf_Tl_S1_12836770_S1_22110353	1	88.5	12836770	22110353	A	C	0	1	0	0	0	0	0	0		0	1	0	0	0	0
Tl_S1_22216372	1	89.1	NA	22216372	A	T	1	1	0	0	0	0	1	0		0	0	0	1	0	0
Tl_S1_22216373	1	89.1	NA	22216373	C	T	1	1	0	0	0	0	1	0		0	0	0	1	0	0
Tl_S1_22216398	1	89.1	NA	22216398	C	T	1	1	0	0	0	0	1	0		0	0	0	1	0	0
Tf_S1_12913807	1	90.1	12913807	NA	C	T	1	1	0	1	0	0	0	0		0	1	0	0	0	0
Tf_S1_12913829	1	90.1	12913829	NA	T	G	1	1	0	1	0	0	0	0		0	1	0	0	0	0
Tf_Tl_S1_12913929_S1_21144341	1	90.1	12913929	21144341	A	G	1	0	0	0	0	0	1	0		0	0	0	0	0	0
Tf_Tl_S1_12919408_S1_21149876	1	90.1	12919408	21149876	A	G	0	1	0	0	0	0	0	0		0	0	1	0	0	0
Tf_Tl_S1_12922375_S1_21152857	1	90.1	12922375	21152857	A	G	1	0	1	0	0	0	0	0		0	0	0	0	0	0
Tl_S1_21197953	1	90.1	NA	21197953	T	C	1	0	0	0	0	0	0	1		0	0	0	0	0	0
Tf_Tl_S1_13083712_S1_21220729	1	90.3	13083712	21220729	T	A	1	0	1	0	0	0	0	0		0	0	0	0	0	0
Tf_Tl_S1_13083764_S1_21220781	1	90.3	13083764	21220781	A	G	0	2	0	0	0	0	0	0		0	0	1	1	0	0
Tf_Tl_S1_16223287_S1_24579737	1	90.7	16223287	24579737	C	G	2	1	1	1	0	0	0	0		0	1	0	0	0	0
Tf_Tl_S1_16223307_S1_24579757	1	90.7	16223307	24579757	T	C	0	1	0	0	0	0	0	0		0	0	1	0	0	0
Tf_Tl_S1_16223309_S1_24579759	1	90.7	16223309	24579759	C	G	0	1	0	0	0	0	0	0		0	0	0	1	0	0
Tf_Tl_S1_16223319_S1_24579769	1	90.7	16223319	24579769	G	A	2	1	1	1	0	0	0	0		0	1	0	0	0	0
Tl_S1_23096818	1	93.8	NA	23096818	T	A	0	1	0	0	0	0	0	0		0	0	1	0	0	0
Tf_Tl_S1_16349287_S1_23163712	1	93.8	16349287	23163712	C	G	0	2	0	0	0	0	0	0		0	1	0	0	1	0
Tl_S1_23164790	1	94	NA	23164790	G	A	0	1	0	0	0	0	0	0		0	0	0	0	0	1
Tf_S1_16350365	1	94	16350365	NA	G	A	0	1	0	0	0	0	0	0		0	0	0	0	0	1
Tf_Tl_S1_16350372_S1_23164797	1	94	16350372	23164797	T	G	0	1	0	0	0	0	0	0		0	0	1	0	0	0
Tf_Tl_S1_16350387_S1_23164812	1	94	16350387	23164812	T	-	3	0	1	0	1	1	0	0		0	0	0	0	0	0
Tf_S1_16383060	1	94.2	16383060	NA	T	C	3	2	0	1	0	0	1	1		1	0	0	1	0	0
Tl_S1_23216607	1	94.3	NA	23216607	G	A	1	0	0	1	0	0	0	0		0	0	0	0	0	0
Tl_S1_23218025	1	94.3	NA	23218025	C	A	2	4	0	0	0	0	1	1		1	0	1	1	0	1
Tf_S1_16386369	1	94.3	16386369	NA	C	A	2	4	0	0	0	0	1	1		1	0	1	1	0	1
Tl_S1_23096815	1	94.3	NA	23096815	C	T	3	1	1	0	1	1	0	0		0	0	0	0	0	1
Tl_S1_23096789	1	94.3	NA	23096789	T	G	0	1	0	0	0	0	0	0		1	0	0	0	0	0
Tf_Tl_S1_16386373_S1_23218031	1	94.3	16386373	23218031	A	C	0	1	0	0	0	0	0	0		0	0	0	0	0	1
Tf_Tl_S1_16386381_S1_23218039	1	94.3	16386381	23218039	A	C	1	4	0	0	0	0	1	0		1	0	1	1	0	1
Tl_S1_23218056	1	94.3	NA	23218056	A	-	2	4	0	0	0	0	1	1		1	0	1	1	0	1
Tf_S1_16386397	1	94.3	16386397	NA	A	-	2	4	0	0	0	0	1	1		1	0	1	1	0	1
Tf_S1_16401401	1	94.9	16401401	NA	C	T	0	1	0	0	0	0	0	0		0	0	0	0	0	1
Tf_S1_16511294	1	94.9	16511294	NA	G	T	2	1	0	1	0	0	0	1		0	0	1	0	0	0
Tf_S1_16511300	1	94.9	16511300	NA	-	T	2	0	0	1	0	0	0	1		0	0	0	0	0	0
Tf_S1_16511301	1	94.9	16511301	NA	-	C	2	0	0	1	0	0	0	1		0	0	0	0	0	0
Tf_Tl_S1_16516377_S1_23353966	1	94.9	16516377	23353966	A	G	2	1	0	1	0	0	0	1		0	0	1	0	0	0
Tf_Tl_S1_16516398_S1_23353987	1	94.9	16516398	23353987	A	-	2	1	0	1	0	0	0	1		0	0	1	0	0	0
Tf_Tl_S1_16516426_S1_23354015	1	95.2	16516426	23354015	T	-	0	2	0	0	0	0	0	0		1	0	0	1	0	0
Tf_Tl_S1_16619705_S1_10762959	1	95.2	16619705	10762959	T	C	0	2	0	0	0	0	0	0		1	0	0	1	0	0
Tf_Tl_S1_16619781_S1_10762883	1	95.2	16619781	10762883	A	G	0	1	0	0	0	0	0	0		0	0	0	0	0	1
Tf_Tl_S1_16734334_S1_10632436	1	95.5	16734334	10632436	A	C	1	0	0	1	0	0	0	0		0	0	0	0	0	0
Tf_S1_15539969	1	95.5	15539969	NA	C	T	0	1	0	0	0	0	0	0		0	0	0	1	0	0
Tf_S1_15540006	1	95.5	15540006	NA	C	-	0	1	0	0	0	0	0	0		0	0	0	1	0	0
Tf_Tl_S1_15246021_S1_23032656	1	95.5	15246021	23032656	A	G	0	2	0	0	0	0	0	0		1	0	0	1	0	0
Tf_S1_15531712	1	95.5	15531712	NA	T	C	0	1	0	0	0	0	0	0		0	0	0	1	0	0
Tf_Tl_S1_15244802_S1_23031433	1	95.5	15244802	23031433	A	G	1	1	0	0	0	0	1	0		0	0	0	0	0	1
Tf_Tl_S1_15244826_S1_23031457	1	95.5	15244826	23031457	-	A	1	1	0	0	0	0	1	0		0	0	0	0	0	1
Tf_Tl_S1_15244827_S1_23031458	1	95.5	15244827	23031458	A	-	1	1	0	0	0	0	1	0		0	0	0	0	0	1
Tf_Tl_S1_15932654_S1_22536386	1	95.9	15932654	22536386	A	-	1	0	0	0	0	1	0	0		0	0	0	0	0	0
Tf_S1_15934508	1	95.9	15934508	NA	G	T	1	0	0	0	0	1	0	0		0	0	0	0	0	0
Tf_Tl_S1_15174185_S1_22922678	1	95.9	15174185	22922678	A	G	2	1	1	1	0	0	0	0		0	0	0	0	0	1
Tf_S1_15610445	1	97	15610445	NA	G	C	0	2	0	0	0	0	0	0		1	1	0	0	0	0
Tf_Tl_S1_15512989_S1_10387840	1	97.2	15512989	10387840	A	T	0	2	0	0	0	0	0	0		1	1	0	0	0	0
Tf_Tl_S1_15512985_S1_10387836	1	97.2	15512985	10387836	-	A	0	2	0	0	0	0	0	0		1	1	0	0	0	0
Tf_Tl_S1_15512995_S1_10387846	1	97.2	15512995	10387846	C	T	0	2	0	0	0	0	0	0		1	1	0	0	0	0
Tf_Tl_S1_15512959_S1_10387810	1	97.2	15512959	10387810	C	T	0	2	0	0	0	0	0	0		1	1	0	0	0	0
Tl_S1_10503411	1	97.2	NA	10503411	G	C	0	2	0	0	0	0	0	0		1	1	0	0	0	0
Tf_S1_15539987	1	97.2	15539987	NA	A	G	1	3	0	1	0	0	0	0		1	1	0	1	0	0
Tf_Tl_S1_15610460_S1_10503426	1	97.2	15610460	10503426	C	T	1	0	0	1	0	0	0	0		0	0	0	0	0	0
Tf_S1_15531709	1	97.2	15531709	NA	C	T	1	0	0	1	0	0	0	0		0	0	0	0	0	0
Tf_S1_15539989	1	97.2	15539989	NA	G	A	1	0	0	1	0	0	0	0		0	0	0	0	0	0
Tf_S1_15917835	1	99.1	15917835	NA	T	-	1	1	0	0	1	0	0	0		1	0	0	0	0	0
Tf_S1_15917782	1	99.1	15917782	NA	A	C	1	1	0	0	1	0	0	0		1	0	0	0	0	0
Tf_S1_15917774	1	99.1	15917774	NA	G	T	1	1	0	0	1	0	0	0		1	0	0	0	0	0
Tl_S1_10387193	1	99.2	NA	10387193	T	G	1	2	0	1	0	0	0	0		1	1	0	0	0	0
Tf_S1_15512370	1	99.2	15512370	NA	T	G	1	2	0	1	0	0	0	0		1	1	0	0	0	0
Tf_S1_15917829	1	99.2	15917829	NA	C	A	1	1	0	0	1	0	0	0		1	0	0	0	0	0
Tl_S1_10387174	1	99.2	NA	10387174	T	C	1	2	0	1	0	0	0	0		1	1	0	0	0	0
Tf_S1_15512351	1	99.2	15512351	NA	T	C	1	2	0	1	0	0	0	0		1	1	0	0	0	0
Tf_Tl_S1_18331375_S1_10236812	1	99.8	18331375	10236812	T	C	0	1	0	0	0	0	0	0		0	0	0	0	1	0
Tf_Tl_S1_18334884_S1_10233475	1	99.8	18334884	10233475	C	T	0	1	0	0	0	0	0	0		0	0	0	0	1	0
Tf_Tl_S1_18340653_S1_10227735	1	99.8	18340653	10227735	T	A	0	1	0	0	0	0	0	0		0	0	0	0	1	0
Tf_Tl_S1_18342331_S1_10226087	1	99.9	18342331	10226087	-	T	3	1	1	0	1	1	0	0		0	0	1	0	0	0
Tf_Tl_S1_18342345_S1_10226073	1	99.9	18342345	10226073	A	-	3	1	1	0	1	1	0	0		0	0	1	0	0	0
Tf_Tl_S1_18665940_S1_9829569	1	101.6	18665940	9829569	A	-	1	1	0	0	0	0	1	0		0	1	0	0	0	0
Tf_Tl_S1_18665944_S1_9829599	1	101.6	18665944	9829599	T	C	0	1	0	0	0	0	0	0		1	0	0	0	0	0
Tf_Tl_S1_18673260_S1_9800608	1	101.6	18673260	9800608	A	T	0	1	0	0	0	0	0	0		0	0	0	1	0	0
Tl_S1_9789508	1	101.6	NA	9789508	G	C	0	2	0	0	0	0	0	0		0	0	0	0	1	1
Tf_S1_18683403	1	101.6	18683403	NA	C	G	0	2	0	0	0	0	0	0		0	0	0	0	1	1
Tf_Tl_S1_18684141_S1_9788770	1	101.6	18684141	9788770	G	A	0	1	0	0	0	0	0	0		0	0	0	1	0	0
Tf_Tl_S1_18684198_S1_9788713	1	102	18684198	9788713	A	T	0	2	0	0	0	0	0	0		1	0	1	0	0	0
Tf_S1_18690739	1	103.8	18690739	NA	C	T	3	0	1	0	1	1	0	0		0	0	0	0	0	0
Tl_S1_9782162	1	103.8	NA	9782162	G	A	3	0	1	0	1	1	0	0		0	0	0	0	0	0
Tf_S1_18715170	1	104.2	18715170	NA	A	G	0	2	0	0	0	0	0	0		0	1	1	0	0	0
Tl_S1_9749131	1	104.2	NA	9749131	T	G	0	2	0	0	0	0	0	0		0	1	1	0	0	0
Tl_S1_9749120	1	104.2	NA	9749120	A	-	0	2	0	0	0	0	0	0		0	1	1	0	0	0
Tl_S1_9749121	1	104.2	NA	9749121	T	-	0	2	0	0	0	0	0	0		0	1	1	0	0	0
Tl_S1_9749124	1	104.2	NA	9749124	C	A	0	2	0	0	0	0	0	0		0	1	1	0	0	0
Tl_S1_9749126	1	104.2	NA	9749126	A	T	0	2	0	0	0	0	0	0		0	1	1	0	0	0
Tf_S1_18715193	1	104.2	18715193	NA	-	T	0	2	0	0	0	0	0	0		0	1	1	0	0	0
Tf_S1_18715204	1	104.2	18715204	NA	T	A	0	2	0	0	0	0	0	0		0	1	1	0	0	0
Tf_Tl_S1_18789851_S1_9645720	1	106.6	18789851	9645720	T	C	0	1	0	0	0	0	0	0		0	1	0	0	0	0
Tf_Tl_S1_18795009_S1_9636978	1	106.7	18795009	9636978	T	G	0	1	0	0	0	0	0	0		0	0	1	0	0	0
Tf_Tl_S1_18795011_S1_9636976	1	106.7	18795011	9636976	T	C	0	1	0	0	0	0	0	0		0	0	1	0	0	0
Tf_Tl_S1_18795022_S1_9636965	1	106.7	18795022	9636965	A	G	0	2	0	0	0	0	0	0		0	0	0	0	1	1
Tf_Tl_S1_18795027_S1_9636960	1	106.7	18795027	9636960	A	T	3	0	1	0	1	1	0	0		0	0	0	0	0	0
Tf_Tl_S1_18802624_S1_9621434	1	106.7	18802624	9621434	-	T	0	1	0	0	0	0	0	0		1	0	0	0	0	0
Tf_Tl_S1_18802644_S1_9621414	1	106.7	18802644	9621414	G	-	0	1	0	0	0	0	0	0		1	0	0	0	0	0
Tf_Tl_S1_18802657_S1_9621401	1	106.7	18802657	9621401	A	-	0	1	0	0	0	0	0	0		1	0	0	0	0	0
Tf_S1_18820779	1	107.2	18820779	NA	G	A	1	1	0	0	0	0	0	1		0	0	0	1	0	0
Tf_S1_18820797	1	107.2	18820797	NA	C	T	0	1	0	0	0	0	0	0		0	1	0	0	0	0
Tf_Tl_S1_18849055_S1_9578123	1	107.2	18849055	9578123	G	A	0	1	0	0	0	0	0	0		0	0	1	0	0	0
Tl_S1_9469344	1	107.7	NA	9469344	-	A	1	0	0	0	0	0	0	1		0	0	0	0	0	0
Tf_Tl_S1_18945688_S1_9469301	1	107.7	18945688	9469301	G	A	1	0	0	0	0	0	0	1		0	0	0	0	0	0
Tl_S1_9414572	1	107.7	NA	9414572	A	-	1	0	0	0	0	0	1	0		0	0	0	0	0	0
Tf_S1_19022981	1	107.7	19022981	NA	-	C	1	0	0	0	0	0	1	0		0	0	0	0	0	0
Tf_Tl_S1_19023014_S1_9414534	1	107.7	19023014	9414534	G	T	1	0	0	0	0	0	1	0		0	0	0	0	0	0
Tf_Tl_S1_19038018_S1_9401130	1	108.3	19038018	9401130	A	T	1	0	0	0	0	0	0	1		0	0	0	0	0	0
Tf_Tl_S1_19047896_S1_9389767	1	108.3	19047896	9389767	T	A	0	1	0	0	0	0	0	0		0	0	1	0	0	0
Tf_Tl_S1_19047909_S1_9389754	1	109.9	19047909	9389754	A	C	0	1	0	0	0	0	0	0		0	0	0	0	1	0
Tf_Tl_S1_19091330_S1_9310348	1	110.1	19091330	9310348	-	A	1	0	0	1	0	0	0	0		0	0	0	0	0	0
Tf_Tl_S1_19092146_S1_9309575	1	110.1	19092146	9309575	T	-	0	1	0	0	0	0	0	0		0	0	0	0	1	0
Tf_S1_19112405	1	110.1	19112405	NA	T	C	1	2	0	0	0	0	0	1		1	1	0	0	0	0
Tf_S1_19112413	1	110.1	19112413	NA	T	A	1	2	0	0	0	0	0	1		1	1	0	0	0	0
Tl_S1_9288125	1	110.1	NA	9288125	A	T	1	2	0	0	0	0	0	1		1	1	0	0	0	0
Tl_S1_9288133	1	110.1	NA	9288133	A	G	1	2	0	0	0	0	0	1		1	1	0	0	0	0
Tf_Tl_S1_19190438_S1_9212757	1	110.1	19190438	9212757	A	G	0	1	0	0	0	0	0	0		0	0	0	0	1	0
Tf_Tl_S1_19190457_S1_9212738	1	110.1	19190457	9212738	C	A	0	1	0	0	0	0	0	0		0	0	0	0	1	0
Tf_Tl_S1_19190462_S1_9212733	1	110.1	19190462	9212733	G	A	0	1	0	0	0	0	0	0		0	0	0	0	1	0
Tf_Tl_S1_19193214_S1_9209931	1	111.9	19193214	9209931	G	C	1	0	0	0	1	0	0	0		0	0	0	0	0	0
Tf_Tl_S1_19223460_S1_9181998	1	111.9	19223460	9181998	C	T	2	0	1	0	0	1	0	0		0	0	0	0	0	0
Tf_Tl_S1_19234078_S1_9172726	1	112	19234078	9172726	C	T	0	1	0	0	0	0	0	0		0	1	0	0	0	0
Tf_Tl_S1_19240818_S1_9160632	1	112	19240818	9160632	C	T	2	0	0	1	1	0	0	0		0	0	0	0	0	0
Tf_Tl_S1_19243593_S1_9157854	1	112	19243593	9157854	A	G	2	3	1	0	0	1	0	0		0	0	0	1	1	1
Tf_Tl_S1_19247440_S1_9154002	1	112	19247440	9154002	G	A	0	3	0	0	0	0	0	0		0	0	0	1	1	1
Tf_Tl_S1_19255179_S1_9146090	1	112	19255179	9146090	G	A	0	1	0	0	0	0	0	0		1	0	0	0	0	0
Tf_Tl_S1_19255200_S1_9146069	1	112	19255200	9146069	G	A	1	0	0	0	1	0	0	0		0	0	0	0	0	0
Tl_S1_9065667	1	112	NA	9065667	C	T	0	1	0	0	0	0	0	0		0	0	0	1	0	0
Tl_S1_9065669	1	112.1	NA	9065669	-	A	0	1	0	0	0	0	0	0		0	0	1	0	0	0
Tf_S1_19260411	1	112.1	19260411	NA	C	T	2	0	1	0	0	1	0	0		0	0	0	0	0	0
Tf_S1_19260433	1	112.1	19260433	NA	A	G	1	0	0	0	1	0	0	0		0	0	0	0	0	0
Tl_S1_9065635	1	112.1	NA	9065635	T	-	0	1	0	0	0	0	0	0		0	0	1	0	0	0
Tf_S1_19473522	1	112.2	19473522	NA	T	C	1	2	0	0	1	0	0	0		0	1	1	0	0	0
Tl_S1_8661517	1	112.2	NA	8661517	A	G	1	2	0	0	1	0	0	0		0	1	1	0	0	0
Tl_S1_8661493	1	112.2	NA	8661493	G	A	3	1	0	1	0	0	1	1		0	0	0	0	0	1
Tf_S1_19473546	1	112.2	19473546	NA	C	T	3	1	0	1	0	0	1	1		0	0	0	0	0	1
Tf_S1_19473566	1	112.3	19473566	NA	C	T	1	1	0	0	1	0	0	0		0	1	0	0	0	0
Tl_S1_8661473	1	112.3	NA	8661473	G	A	1	1	0	0	1	0	0	0		0	1	0	0	0	0
Tl_S1_8631835	1	112.3	NA	8631835	G	A	0	1	0	0	0	0	0	0		1	0	0	0	0	0
Tl_S1_8631836	1	112.3	NA	8631836	C	A	0	1	0	0	0	0	0	0		1	0	0	0	0	0
Tl_S1_8631850	1	112.3	NA	8631850	C	T	1	0	0	1	0	0	0	0		0	0	0	0	0	0
Tf_Tl_S1_19475450_S1_8659604	1	112.3	19475450	8659604	A	G	0	1	0	0	0	0	0	0		0	0	1	0	0	0
Tf_S1_19500020	1	112.3	19500020	NA	G	T	0	1	0	0	0	0	0	0		1	0	0	0	0	0
Tf_S1_19500021	1	112.3	19500021	NA	C	T	0	1	0	0	0	0	0	0		1	0	0	0	0	0
Tf_Tl_S1_19535958_S1_8560921	1	112.9	19535958	8560921	G	A	1	0	0	0	0	1	0	0		0	0	0	0	0	0
Tf_S1_19617725	1	113.1	19617725	NA	G	A	1	0	0	0	0	0	1	0		0	0	0	0	0	0
Tf_S1_19635980	1	113.2	19635980	NA	T	C	3	1	1	1	0	1	0	0		0	0	0	0	1	0
Tf_Tl_S1_19638752_S1_8452404	1	113.2	19638752	8452404	C	T	1	0	0	0	0	1	0	0		0	0	0	0	0	0
Tl_S1_8443634	1	113.2	NA	8443634	A	G	3	2	1	1	1	0	0	0		0	1	0	0	1	0
Tf_Tl_S1_19638755_S1_8452401	1	113.2	19638755	8452401	G	A	1	1	0	0	0	0	0	1		0	0	1	0	0	0
Tf_Tl_S1_19671634_S1_8422264	1	113.7	19671634	8422264	-	T	3	2	1	1	0	0	1	0		1	0	0	0	1	0
Tf_Tl_S1_19671635_S1_8422263	1	113.7	19671635	8422263	T	-	3	2	1	1	0	0	1	0		1	0	0	0	1	0
Tf_Tl_S1_19671657_S1_8422241	1	113.7	19671657	8422241	A	G	3	2	1	1	0	0	1	0		1	0	0	0	1	0
Tf_Tl_S1_19680035_S1_8418514	1	114	19680035	8418514	A	T	0	1	0	0	0	0	0	0		0	0	1	0	0	0
Tf_Tl_S1_19709679_S1_8384330	1	114	19709679	8384330	C	A	1	1	1	0	0	0	0	0		0	0	0	0	1	0
Tf_Tl_S1_19709721_S1_8384288	1	114.2	19709721	8384288	T	C	2	1	0	1	0	0	1	0		1	0	0	0	0	0
Tf_Tl_S1_19709724_S1_8384285	1	114.2	19709724	8384285	C	T	1	0	0	0	0	1	0	0		0	0	0	0	0	0
Tf_Tl_S1_19710166_S1_8383799	1	114.2	19710166	8383799	A	G	0	1	0	0	0	0	0	0		0	0	1	0	0	0
Tf_Tl_S1_19710256_S1_8383709	1	114.2	19710256	8383709	G	A	0	1	0	0	0	0	0	0		1	0	0	0	0	0
Tf_Tl_S1_19735153_S1_8344849	1	114.5	19735153	8344849	A	G	1	1	0	0	0	0	1	0		0	0	0	0	0	1
Tf_S1_19797726	1	115.2	19797726	NA	T	-	2	1	0	1	0	0	0	1		0	0	0	0	0	1
Tf_S1_19797728	1	115.2	19797728	NA	-	T	2	1	0	1	0	0	0	1		0	0	0	0	0	1
Tf_Tl_S1_19797772_S1_8262584	1	115.2	19797772	8262584	C	T	2	1	0	1	0	0	0	1		0	0	0	0	0	1
Tf_Tl_S1_19797776_S1_8262580	1	115.2	19797776	8262580	A	T	2	1	0	1	0	0	0	1		0	0	0	0	0	1
Tl_S1_8094378	1	116.3	NA	8094378	C	T	0	1	0	0	0	0	0	0		0	0	1	0	0	0
Tl_S1_8170185	1	116.3	NA	8170185	A	T	1	0	0	0	0	1	0	0		0	0	0	0	0	0
Tl_S1_8004416	1	116.3	NA	8004416	A	-	1	1	0	1	0	0	0	0		0	0	1	0	0	0
Tf_Tl_S1_19887833_S1_8179071	1	116.3	19887833	8179071	T	A	1	0	0	0	0	1	0	0		0	0	0	0	0	0
Tf_Tl_S1_17233341_S1_7933361	1	116.3	17233341	7933361	A	T	1	1	0	1	0	0	0	0		0	0	1	0	0	0
Tf_Tl_S1_17235309_S1_7931479	1	116.5	17235309	7931479	-	A	0	1	0	0	0	0	0	0		0	0	0	0	0	1
Tf_Tl_S1_17235331_S1_7931457	1	116.5	17235331	7931457	A	-	0	1	0	0	0	0	0	0		0	0	0	0	0	1
Tf_Tl_S1_17248786_S1_7914728	1	116.7	17248786	7914728	G	A	1	1	0	0	0	0	1	0		1	0	0	0	0	0
Tf_S1_17296065	1	117.1	17296065	NA	G	A	1	1	0	0	0	0	1	0		1	0	0	0	0	0
Tf_S1_17296094	1	117.1	17296094	NA	A	G	2	1	0	0	0	1	1	0		1	0	0	0	0	0
Tf_Tl_S1_17300127_S1_7838856	1	117.1	17300127	7838856	A	G	1	0	0	0	0	1	0	0		0	0	0	0	0	0
Tf_Tl_S1_17384235_S1_7733664	1	117.4	17384235	7733664	A	G	1	1	0	0	0	0	1	0		1	0	0	0	0	0
Tf_S1_17385097	1	117.4	17385097	NA	T	C	2	4	0	0	1	1	0	0		0	1	1	1	0	1
Tf_Tl_S1_17385418_S1_7732469	1	117.4	17385418	7732469	T	C	1	1	0	0	0	0	1	0		1	0	0	0	0	0
Tf_Tl_S1_17385439_S1_7732439	1	117.4	17385439	7732439	T	C	0	1	0	0	0	0	0	0		0	0	0	0	0	1
Tf_S1_17615226	1	119.4	17615226	NA	C	T	0	2	0	0	0	0	0	0		0	0	0	1	0	1
Tf_S1_17615268	1	120.1	17615268	NA	C	T	0	1	0	0	0	0	0	0		1	0	0	0	0	0
Tf_S1_17646645	1	120.1	17646645	NA	C	T	2	0	0	1	0	1	0	0		0	0	0	0	0	0
Tf_S1_17646671	1	120.1	17646671	NA	T	C	2	2	1	0	0	0	0	1		0	1	0	0	1	0
Tf_S1_17646681	1	120.1	17646681	NA	T	A	3	2	0	1	0	1	1	0		1	0	1	0	0	0
Tf_S1_17648398	1	120.1	17648398	NA	A	G	1	1	0	0	0	0	1	0		0	0	1	0	0	0
Tf_Tl_S1_17674405_S1_7136911	1	120.1	17674405	7136911	A	G	3	1	0	1	0	1	1	0		0	0	1	0	0	0
Tf_Tl_S1_17674408_S1_7136914	1	120.1	17674408	7136914	C	A	3	1	0	1	0	1	1	0		0	0	1	0	0	0
Tf_Tl_S1_17674445_S1_7136951	1	120.1	17674445	7136951	T	C	3	1	0	1	0	1	1	0		0	0	1	0	0	0
Tf_Tl_S1_17692754_S1_7161946	1	120.4	17692754	7161946	A	G	1	0	0	0	1	0	0	0		0	0	0	0	0	0
Tf_Tl_S1_17718367_S1_7184885	1	120.4	17718367	7184885	A	G	2	2	1	0	0	0	0	1		0	1	0	0	1	0
Tf_Tl_S1_17723443_S1_7190763	1	120.4	17723443	7190763	T	G	1	0	0	1	0	0	0	0		0	0	0	0	0	0
Tl_S1_7197190	1	120.5	NA	7197190	T	C	2	0	0	1	0	1	0	0		0	0	0	0	0	0
Tf_Tl_S1_17840318_S1_7318722	1	120.8	17840318	7318722	A	T	1	0	0	0	0	1	0	0		0	0	0	0	0	0
Tf_Tl_S1_17840324_S1_7318728	1	120.8	17840324	7318728	T	G	1	0	0	0	0	1	0	0		0	0	0	0	0	0
Tf_Tl_S1_17846349_S1_7326950	1	120.8	17846349	7326950	G	T	1	0	0	0	1	0	0	0		0	0	0	0	0	0
Tf_S1_17870382	1	120.9	17870382	NA	T	A	0	1	0	0	0	0	0	0		0	0	1	0	0	0
Tf_Tl_S1_17882925_S1_7370518	1	120.9	17882925	7370518	T	C	2	1	0	0	0	1	1	0		0	0	1	0	0	0
Tf_Tl_S1_17882931_S1_7370524	1	120.9	17882931	7370524	T	C	0	3	0	0	0	0	0	0		1	0	0	1	0	1
Tf_Tl_S1_17882949_S1_7370542	1	121	17882949	7370542	T	A	0	3	0	0	0	0	0	0		1	0	0	1	0	1
Tf_Tl_S1_17884160_S1_7372499	1	121	17884160	7372499	A	G	1	0	0	0	0	0	1	0		0	0	0	0	0	0
Tf_S1_17884163	1	121	17884163	NA	T	C	0	3	0	0	0	0	0	0		1	0	0	1	0	1
Tf_Tl_S1_17884166_S1_7372505	1	121	17884166	7372505	T	C	0	1	0	0	0	0	0	0		0	0	1	0	0	0
Tl_S1_7077627	1	121	NA	7077627	C	T	2	0	0	1	0	1	0	0		0	0	0	0	0	0
Tf_S1_17884865	1	121.2	17884865	NA	G	T	0	3	0	0	0	0	0	0		1	0	0	1	0	1
Tf_Tl_S1_17884898_S1_7373237	1	121.2	17884898	7373237	T	G	1	0	0	0	0	1	0	0		0	0	0	0	0	0
Tl_S1_7373240	1	121.2	NA	7373240	A	C	1	3	0	0	0	0	1	0		1	0	0	1	0	1
Tf_S1_17884901	1	121.2	17884901	NA	A	C	1	3	0	0	0	0	1	0		1	0	0	1	0	1
Tl_S1_7373243	1	121.2	NA	7373243	A	G	3	3	1	0	0	1	0	1		0	1	1	0	1	0
Tf_S1_17884904	1	121.2	17884904	NA	A	G	3	3	1	0	0	1	0	1		0	1	1	0	1	0
Tl_S1_7379963	1	121.3	NA	7379963	G	A	1	0	0	0	0	1	0	0		0	0	0	0	0	0
Tl_S1_7379993	1	121.3	NA	7379993	A	-	1	0	0	0	0	1	0	0		0	0	0	0	0	0
Tf_S1_17892656	1	121.4	17892656	NA	A	G	1	3	0	0	0	0	1	0		1	0	0	1	0	1
Tf_S1_17892676	1	121.4	17892676	NA	G	C	1	0	0	0	0	1	0	0		0	0	0	0	0	0
Tl_S1_7688556	1	121.4	NA	7688556	C	T	1	2	0	0	1	0	0	0		0	1	0	1	0	0
Tf_S1_17908749	1	121.6	17908749	NA	G	A	1	0	0	1	0	0	0	0		0	0	0	0	0	0
Tf_S1_17908760	1	121.6	17908760	NA	T	A	1	0	0	0	1	0	0	0		0	0	0	0	0	0
Tf_S1_17908763	1	121.6	17908763	NA	C	T	1	0	0	1	0	0	0	0		0	0	0	0	0	0
Tf_S1_17908764	1	121.6	17908764	NA	G	T	1	0	0	0	0	1	0	0		0	0	0	0	0	0
Tf_S1_17908794	1	121.6	17908794	NA	T	C	1	0	0	1	0	0	0	0		0	0	0	0	0	0
Tl_S1_7571312	1	121.6	NA	7571312	C	T	1	0	0	0	0	0	1	0		0	0	0	0	0	0
Tl_S1_7571302	1	121.6	NA	7571302	C	A	1	0	0	0	0	0	1	0		0	0	0	0	0	0
Tl_S1_7394645	1	121.7	NA	7394645	T	A	1	0	0	0	1	0	0	0		0	0	0	0	0	0
Tl_S1_7394649	1	121.7	NA	7394649	G	T	1	0	0	0	0	1	0	0		0	0	0	0	0	0
Tl_S1_7394651	1	121.7	NA	7394651	C	T	1	0	0	0	0	1	0	0		0	0	0	0	0	0
Tl_S1_7394652	1	121.7	NA	7394652	G	T	1	0	0	0	0	1	0	0		0	0	0	0	0	0
Tl_S1_7394654	1	121.7	NA	7394654	G	T	1	0	0	0	0	1	0	0		0	0	0	0	0	0
Tf_Tl_S1_17967846_S1_7445171	1	121.8	17967846	7445171	T	C	2	1	0	1	0	1	0	0		0	0	1	0	0	0
Tl_S1_6981932	1	121.8	NA	6981932	C	T	0	2	0	0	0	0	0	0		0	0	0	1	0	1
Tf_Tl_S1_17967851_S1_7445176	1	122.1	17967851	7445176	G	A	2	2	1	0	0	0	0	1		0	1	0	0	1	0
Tf_S1_17998112	1	122.2	17998112	NA	G	A	2	3	1	0	0	0	0	1		0	1	1	0	1	0
Tl_S1_7498909	1	122.2	NA	7498909	G	A	2	3	1	0	0	0	0	1		0	1	1	0	1	0
Tf_Tl_S1_18002738_S1_7503293	1	122.5	18002738	7503293	T	C	2	0	0	0	1	1	0	0		0	0	0	0	0	0
Tf_Tl_S1_18003273_S1_7503850	1	122.5	18003273	7503850	G	C	1	0	0	0	1	0	0	0		0	0	0	0	0	0
Tf_Tl_S1_18003283_S1_7503860	1	122.5	18003283	7503860	G	A	2	0	0	0	1	1	0	0		0	0	0	0	0	0
Tf_S1_18004880	1	122.5	18004880	NA	T	C	2	0	0	1	0	1	0	0		0	0	0	0	0	0
Tf_S1_18004898	1	122.5	18004898	NA	C	T	1	0	0	1	0	0	0	0		0	0	0	0	0	0
Tl_S1_7505514	1	122.5	NA	7505514	T	C	1	0	0	1	0	0	0	0		0	0	0	0	0	0
Tl_S1_7505532	1	122.5	NA	7505532	C	T	1	0	0	1	0	0	0	0		0	0	0	0	0	0
Tf_Tl_S1_18010720_S1_7508965	1	122.5	18010720	7508965	G	A	1	0	0	0	1	0	0	0		0	0	0	0	0	0
Tf_Tl_S1_18010727_S1_7508972	1	122.5	18010727	7508972	C	G	1	0	0	0	1	0	0	0		0	0	0	0	0	0
Tf_S1_18061908	1	122.5	18061908	NA	C	T	2	2	1	0	0	0	0	1		0	1	0	0	1	0
Tl_S1_7522629	1	122.5	NA	7522629	C	A	1	0	0	1	0	0	0	0		0	0	0	0	0	0
Tl_S1_7522659	1	122.5	NA	7522659	T	C	1	0	0	1	0	0	0	0		0	0	0	0	0	0
Tl_S1_7523554	1	122.5	NA	7523554	C	T	2	2	1	0	0	0	0	1		0	1	0	0	1	0
Tf_Tl_S1_18061932_S1_7523578	1	122.5	18061932	7523578	T	C	1	0	0	1	0	0	0	0		0	0	0	0	0	0
Tf_Tl_S1_20049620_S1_6890479	1	125.7	20049620	6890479	C	G	2	3	0	0	1	0	1	0		0	0	1	1	0	1
Tf_Tl_S1_20050834_S1_6889242	1	125.7	20050834	6889242	T	G	1	2	0	0	1	0	0	0		0	0	0	1	0	1
Tl_S1_6873204	1	125.7	NA	6873204	A	T	2	0	0	1	0	1	0	0		0	0	0	0	0	0
Tf_Tl_S1_20062706_S1_6877226	1	125.7	20062706	6877226	C	T	2	0	0	1	0	1	0	0		0	0	0	0	0	0
Tf_Tl_S1_20086917_S1_6844689	1	126	20086917	6844689	C	T	0	1	0	0	0	0	0	0		1	0	0	0	0	0
Tf_Tl_S1_20127453_S1_6780596	1	126	20127453	6780596	G	A	0	1	0	0	0	0	0	0		1	0	0	0	0	0
Tf_S1_20139603	1	126	20139603	NA	G	C	2	0	0	1	0	1	0	0		0	0	0	0	0	0
Tf_S1_20139607	1	126	20139607	NA	C	T	1	1	0	0	0	0	1	0		0	0	1	0	0	0
Tl_S1_6767593	1	126	NA	6767593	G	A	1	1	0	0	0	0	1	0		0	0	1	0	0	0
Tl_S1_6767597	1	126	NA	6767597	C	G	2	0	0	1	0	1	0	0		0	0	0	0	0	0
Tf_Tl_S1_20140125_S1_6767084	1	126.1	20140125	6767084	G	A	1	1	0	0	0	0	1	0		0	0	1	0	0	0
Tf_S1_20167505	1	126.2	20167505	NA	T	A	1	2	0	0	1	0	0	0		0	0	0	1	0	1
Tl_S1_6741366	1	126.2	NA	6741366	A	T	1	2	0	0	1	0	0	0		0	0	0	1	0	1
Tf_S1_20167520	1	126.2	20167520	NA	T	A	2	3	0	0	1	0	1	0		0	0	1	1	0	1
Tl_S1_6741351	1	126.2	NA	6741351	A	T	2	3	0	0	1	0	1	0		0	0	1	1	0	1
Tf_S1_20170567	1	126.2	20170567	NA	A	-	1	1	0	0	0	0	1	0		0	0	1	0	0	0
Tf_S1_20170577	1	126.2	20170577	NA	T	C	1	1	0	0	0	0	1	0		0	0	1	0	0	0
Tl_S1_6737591	1	126.2	NA	6737591	A	G	1	1	0	0	0	0	1	0		0	0	1	0	0	0
Tf_Tl_S1_20170580_S1_6737588	1	126.2	20170580	6737588	C	T	0	1	0	0	0	0	0	0		1	0	0	0	0	0
Tf_Tl_S1_20182078_S1_6726909	1	126.2	20182078	6726909	T	C	2	0	0	1	0	1	0	0		0	0	0	0	0	0
Tf_Tl_S1_20182080_S1_6726900	1	126.2	20182080	6726900	T	G	2	0	0	1	0	1	0	0		0	0	0	0	0	0
Tf_Tl_S1_20182111_S1_6726876	1	126.4	20182111	6726876	G	A	1	2	0	0	0	0	1	0		1	0	1	0	0	0
Tf_S1_20197475	1	126.7	20197475	NA	T	C	1	2	0	0	0	0	1	0		1	0	1	0	0	0
Tf_S1_20197476	1	126.7	20197476	NA	G	A	1	1	0	0	0	0	1	0		0	0	1	0	0	0
Tf_Tl_S1_20208501_S1_6684636	1	126.7	20208501	6684636	A	-	2	4	1	0	0	0	0	1		1	1	0	1	1	0
Tl_S1_6622903	1	127.4	NA	6622903	C	T	2	0	0	1	0	1	0	0		0	0	0	0	0	0
Tl_S1_6622872	1	127.4	NA	6622872	-	A	2	1	0	1	0	1	0	0		0	1	0	0	0	0
Tf_Tl_S1_20332569_S1_6568909	1	127.7	20332569	6568909	A	G	2	2	0	0	1	0	1	0		0	0	1	0	0	1
Tf_S1_20361158	1	128.8	20361158	NA	C	G	2	0	0	1	0	1	0	0		0	0	0	0	0	0
Tl_S1_6541471	1	128.8	NA	6541471	G	C	2	0	0	1	0	1	0	0		0	0	0	0	0	0
Tf_Tl_S1_20422516_S1_6478813	1	130.1	20422516	6478813	C	T	0	1	0	0	0	0	0	0		0	1	0	0	0	0
Tf_Tl_S1_20422525_S1_6478804	1	130.1	20422525	6478804	A	C	0	1	0	0	0	0	0	0		1	0	0	0	0	0
Tf_S1_20422552	1	130.1	20422552	NA	C	T	0	2	0	0	0	0	0	0		1	1	0	0	0	0
Tl_S1_6478777	1	130.1	NA	6478777	G	A	0	2	0	0	0	0	0	0		1	1	0	0	0	0
Tf_S1_20423369	1	130.3	20423369	NA	T	C	0	1	0	0	0	0	0	0		0	1	0	0	0	0
Tl_S1_6478321	1	130.3	NA	6478321	A	T	0	1	0	0	0	0	0	0		0	1	0	0	0	0
Tl_S1_6478324	1	130.3	NA	6478324	T	C	0	1	0	0	0	0	0	0		0	1	0	0	0	0
Tl_S1_6478345	1	130.3	NA	6478345	-	G	0	1	0	0	0	0	0	0		0	1	0	0	0	0
Tl_S1_6478346	1	130.3	NA	6478346	-	A	0	1	0	0	0	0	0	0		0	1	0	0	0	0
Tl_S1_6478296	1	130.3	NA	6478296	T	-	0	1	0	0	0	0	0	0		0	1	0	0	0	0
Tl_S1_6478320	1	130.3	NA	6478320	T	C	0	1	0	0	0	0	0	0		0	1	0	0	0	0
Tl_S1_6475563	1	130.3	NA	6475563	C	A	0	1	0	0	0	0	0	0		0	0	0	1	0	0
Tf_S1_20425714	1	130.3	20425714	NA	G	T	0	1	0	0	0	0	0	0		0	0	0	1	0	0
Tf_Tl_S1_20440291_S1_6454641	1	130.3	20440291	6454641	A	C	1	2	0	0	0	0	1	0		0	0	1	1	0	0
Tf_Tl_S1_20484839_S1_6390371	1	130.7	20484839	6390371	A	T	2	1	1	0	0	0	0	1		0	0	0	0	1	0
Tf_Tl_S1_20484879_S1_6390331	1	130.7	20484879	6390331	G	T	0	2	0	0	0	0	0	0		1	0	0	0	0	1
Tf_S1_20484887	1	130.7	20484887	NA	-	G	2	1	1	0	0	0	0	1		0	0	0	0	1	0
Tf_Tl_S1_20497491_S1_6376304	1	130.7	20497491	6376304	G	T	0	1	0	0	0	0	0	0		0	0	0	0	0	1
Tf_Tl_S1_20497506_S1_6376289	1	130.7	20497506	6376289	C	A	0	1	0	0	0	0	0	0		1	0	0	0	0	0
Tf_Tl_S1_20497562_S1_6376233	1	130.7	20497562	6376233	T	A	0	1	0	0	0	0	0	0		1	0	0	0	0	0
Tf_Tl_S1_20511835_S1_6358626	1	130.9	20511835	6358626	A	G	0	1	0	0	0	0	0	0		0	1	0	0	0	0
Tf_S1_20563145	1	130.9	20563145	NA	T	A	1	0	0	0	1	0	0	0		0	0	0	0	0	0
Tf_S1_20565989	1	130.9	20565989	NA	T	-	2	1	0	0	1	0	1	0		0	0	1	0	0	0
Tl_S1_6308931	1	130.9	NA	6308931	A	-	2	1	0	0	1	0	1	0		0	0	1	0	0	0
Tl_S1_6311796	1	130.9	NA	6311796	A	T	1	0	0	0	1	0	0	0		0	0	0	0	0	0
Tl_S1_6327332	1	130.9	NA	6327332	G	C	0	1	0	0	0	0	0	0		0	0	0	1	0	0
Tf_Tl_S1_20565992_S1_6308928	1	130.9	20565992	6308928	C	T	0	1	0	0	0	0	0	0		0	0	0	1	0	0
Tf_Tl_S1_20566021_S1_6308899	1	130.9	20566021	6308899	C	T	0	1	0	0	0	0	0	0		0	0	0	0	0	1
Tf_S1_20566041	1	130.9	20566041	NA	T	-	0	1	0	0	0	0	0	0		0	0	0	1	0	0
Tf_Tl_S1_20572303_S1_6301585	1	130.9	20572303	6301585	C	A	1	0	0	0	1	0	0	0		0	0	0	0	0	0
Tl_S1_6308878	1	130.9	NA	6308878	-	A	2	1	0	0	1	0	1	0		0	0	1	0	0	0
Tl_S1_6308880	1	130.9	NA	6308880	G	A	0	1	0	0	0	0	0	0		1	0	0	0	0	0
Tf_S1_20574531	1	131.5	20574531	NA	C	A	2	1	0	1	0	1	0	0		0	1	0	0	0	0
Tl_S1_6295913	1	131.5	NA	6295913	G	T	2	1	0	1	0	1	0	0		0	1	0	0	0	0
Tf_S1_20574578	1	131.5	20574578	NA	T	A	4	2	1	1	0	1	0	1		0	1	0	0	1	0
Tf_S1_20574579	1	131.5	20574579	NA	T	A	4	2	1	1	0	1	0	1		0	1	0	0	1	0
Tl_S1_6295866	1	131.5	NA	6295866	A	T	4	2	1	1	0	1	0	1		0	1	0	0	1	0
Tf_Tl_S1_20622007_S1_6235455	1	132.1	20622007	6235455	G	T	1	0	0	0	1	0	0	0		0	0	0	0	0	0
Tf_S1_20639495	1	132.5	20639495	NA	-	A	2	1	1	0	0	0	0	1		0	0	0	0	1	0
Tf_S1_20639497	1	132.5	20639497	NA	A	-	2	1	0	1	0	1	0	0		0	1	0	0	0	0
Tl_S1_6216887	1	132.5	NA	6216887	T	-	2	1	1	0	0	0	0	1		0	0	0	0	1	0
Tf_Tl_S1_20639520_S1_6216897	1	132.7	20639520	6216897	A	G	0	1	0	0	0	0	0	0		0	1	0	0	0	0
Tl_S1_6181081	1	132.7	NA	6181081	G	A	1	0	0	0	1	0	0	0		0	0	0	0	0	0
Tl_S1_6181103	1	132.7	NA	6181103	A	C	1	0	0	0	1	0	0	0		0	0	0	0	0	0
Tl_S1_6181134	1	132.7	NA	6181134	T	A	1	0	0	0	1	0	0	0		0	0	0	0	0	0
Tf_Tl_S1_20639550_S1_6216864	1	132.7	20639550	6216864	C	T	2	0	0	1	0	1	0	0		0	0	0	0	0	0
Tf_Tl_S1_20734445_S1_6148256	1	133.1	20734445	6148256	C	A	2	0	0	1	0	1	0	0		0	0	0	0	0	0
Tf_Tl_S1_20734447_S1_6148254	1	133.1	20734447	6148254	A	G	2	0	0	1	0	1	0	0		0	0	0	0	0	0
Tf_Tl_S1_20749769_S1_6131427	1	133.1	20749769	6131427	G	A	1	1	0	0	0	0	1	0		0	0	1	0	0	0
Tf_Tl_S1_20752608_S1_6128354	1	133.1	20752608	6128354	C	T	2	1	1	0	0	0	0	1		0	0	0	0	1	0
Tf_Tl_S1_20752641_S1_6128321	1	133.1	20752641	6128321	C	T	2	0	0	1	0	1	0	0		0	0	0	0	0	0
Tf_Tl_S1_20752642_S1_6128320	1	133.1	20752642	6128320	G	A	0	2	0	0	0	0	0	0		0	1	0	1	0	0
Tf_Tl_S1_20758409_S1_6122447	1	133.5	20758409	6122447	C	T	1	1	0	0	0	0	1	0		0	0	1	0	0	0
Tf_Tl_S1_20758436_S1_6122420	1	133.5	20758436	6122420	C	A	1	1	0	0	0	0	1	0		0	0	1	0	0	0
Tl_S1_6114232	1	133.5	NA	6114232	G	T	0	1	0	0	0	0	0	0		1	0	0	0	0	0
Tf_Tl_S1_20766938_S1_6113532	1	133.5	20766938	6113532	C	T	0	1	0	0	0	0	0	0		1	0	0	0	0	0
Tf_S1_20841875	1	133.6	20841875	NA	C	G	1	0	0	0	1	0	0	0		0	0	0	0	0	0
Tf_Tl_S1_20898163_S1_6008314	1	134	20898163	6008314	A	G	0	1	0	0	0	0	0	0		1	0	0	0	0	0
Tf_S1_20898171	1	134	20898171	NA	A	G	1	0	0	0	0	0	1	0		0	0	0	0	0	0
Tl_S1_6008306	1	134	NA	6008306	T	C	1	0	0	0	0	0	1	0		0	0	0	0	0	0
Tf_S1_20899515	1	134.1	20899515	NA	-	T	2	1	0	1	0	1	0	0		0	0	0	0	0	1
Tl_S1_6006973	1	134.1	NA	6006973	-	A	2	1	0	1	0	1	0	0		0	0	0	0	0	1
Tl_S1_6006927	1	134.1	NA	6006927	T	A	3	1	0	1	1	1	0	0		0	0	0	0	0	1
Tf_S1_20899561	1	134.1	20899561	NA	A	T	3	1	0	1	1	1	0	0		0	0	0	0	0	1
Tl_S1_6006900	1	134.1	NA	6006900	C	T	0	1	0	0	0	0	0	0		0	1	0	0	0	0
Tf_Tl_S1_20899580_S1_6006908	1	134.1	20899580	6006908	A	C	1	0	0	0	1	0	0	0		0	0	0	0	0	0
Tf_S1_20899588	1	134.1	20899588	NA	G	A	0	1	0	0	0	0	0	0		0	1	0	0	0	0
Tf_Tl_S1_20899610_S1_6006878	1	134.1	20899610	6006878	G	-	2	1	0	1	0	1	0	0		0	0	0	0	0	1
Tf_Tl_S1_20899612_S1_6006851	1	134.1	20899612	6006851	A	G	2	1	0	1	0	1	0	0		0	0	0	0	0	1
Tf_S1_20899616	1	134.3	20899616	NA	T	-	2	2	1	0	0	0	0	1		0	0	1	0	1	0
Tf_Tl_S1_20899625_S1_6006864	1	134.3	20899625	6006864	A	G	1	1	0	0	0	0	1	0		0	1	0	0	0	0
Tf_S1_20968398	1	134.5	20968398	NA	C	A	2	2	1	0	0	0	0	1		0	0	1	0	1	0
Tf_Tl_S1_20977986_S1_5970520	1	134.7	20977986	5970520	C	T	2	2	1	0	0	0	0	1		0	0	1	0	1	0
Tf_Tl_S1_20978029_S1_5970477	1	134.7	20978029	5970477	G	C	1	0	0	0	1	0	0	0		0	0	0	0	0	0
Tl_S1_5970401	1	134.8	NA	5970401	-	T	2	2	1	0	0	0	0	1		0	0	1	0	1	0
Tl_S1_5970398	1	134.8	NA	5970398	G	-	2	2	1	0	0	0	0	1		0	0	1	0	1	0
Tl_S1_5970404	1	134.8	NA	5970404	T	A	3	2	1	0	0	0	1	1		0	0	1	0	1	0
Tl_S1_5970411	1	134.8	NA	5970411	T	C	3	1	0	1	1	1	0	0		0	1	0	0	0	0
Tl_S1_5970428	1	134.8	NA	5970428	C	T	2	3	1	0	0	0	0	1		1	0	1	0	1	0
Tl_S1_5970432	1	134.8	NA	5970432	G	A	0	1	0	0	0	0	0	0		0	0	0	0	0	1
Tf_Tl_S1_20978030_S1_5970476	1	134.8	20978030	5970476	T	G	0	1	0	0	0	0	0	0		0	0	0	0	0	1
Tf_Tl_S1_20987998_S1_5959474	1	134.8	20987998	5959474	C	T	1	0	0	0	0	0	1	0		0	0	0	0	0	0
Tf_Tl_S1_20989499_S1_5958024	1	135.1	20989499	5958024	A	G	1	0	0	0	1	0	0	0		0	0	0	0	0	0
Tf_Tl_S1_20991192_S1_5956383	1	135.2	20991192	5956383	C	A	1	0	0	0	1	0	0	0		0	0	0	0	0	0
Tf_S1_20991854	1	135.2	20991854	NA	T	A	2	2	1	0	0	0	0	1		0	0	1	0	1	0
Tf_S1_20991868	1	135.2	20991868	NA	C	T	3	3	1	0	1	0	0	1		0	1	1	0	1	0
Tf_Tl_S1_20991876_S1_5955698	1	135.2	20991876	5955698	G	A	0	1	0	0	0	0	0	0		0	0	0	0	0	1
Tl_S1_5955706	1	135.2	NA	5955706	G	A	3	3	1	0	1	0	0	1		0	1	1	0	1	0
Tf_S1_20991877	1	135.2	20991877	NA	G	C	1	0	0	0	1	0	0	0		0	0	0	0	0	0
Tf_S1_20991890	1	135.2	20991890	NA	G	A	1	0	0	0	1	0	0	0		0	0	0	0	0	0
Tf_S1_20991903	1	135.2	20991903	NA	T	C	3	3	1	0	1	0	0	1		0	1	1	0	1	0
Tl_S1_5955671	1	135.2	NA	5955671	A	G	3	3	1	0	1	0	0	1		0	1	1	0	1	0
Tl_S1_5955695	1	135.2	NA	5955695	A	G	2	2	1	0	0	0	0	1		0	0	1	0	1	0
Tl_S1_5955684	1	135.2	NA	5955684	C	T	1	0	0	0	1	0	0	0		0	0	0	0	0	0
Tf_Tl_S1_21007698_S1_5942180	1	135.6	21007698	5942180	T	C	0	2	0	0	0	0	0	0		0	0	0	1	0	1
Tf_Tl_S1_21098794_S1_25934798	1	135.6	21098794	25934798	G	C	0	1	0	0	0	0	0	0		1	0	0	0	0	0
Tf_Tl_S1_21098796_S1_25934800	1	135.6	21098796	25934800	T	C	1	0	0	0	1	0	0	0		0	0	0	0	0	0
Tf_Tl_S1_21158999_S1_26018213	1	136	21158999	26018213	G	T	1	0	0	0	1	0	0	0		0	0	0	0	0	0
Tf_Tl_S1_21159021_S1_26018235	1	136	21159021	26018235	A	G	0	1	0	0	0	0	0	0		0	0	0	1	0	0
Tf_Tl_S1_21163543_S1_26023025	1	136.3	21163543	26023025	A	-	0	1	0	0	0	0	0	0		0	1	0	0	0	0
Tf_Tl_S1_21163590_S1_26023073	1	136.3	21163590	26023073	A	C	0	1	0	0	0	0	0	0		0	1	0	0	0	0
Tf_Tl_S1_21199885_S1_26073780	1	136.3	21199885	26073780	G	C	0	1	0	0	0	0	0	0		0	0	0	1	0	0
Tf_Tl_S1_21199905_S1_26073800	1	136.3	21199905	26073800	C	T	0	1	0	0	0	0	0	0		0	0	0	0	0	1
Tl_S1_26085307	1	136.4	NA	26085307	T	C	1	2	0	0	0	0	1	0		1	1	0	0	0	0
Tl_S1_26085319	1	136.4	NA	26085319	A	G	1	2	0	0	0	0	1	0		1	1	0	0	0	0
Tf_Tl_S1_21238602_S1_26106385	1	136.4	21238602	26106385	T	C	1	1	0	0	1	0	0	0		1	0	0	0	0	0
Tf_Tl_S1_21238608_S1_26106391	1	136.4	21238608	26106391	A	G	2	1	1	0	0	0	0	1		0	0	0	0	1	0
Tf_Tl_S1_21766797_S1_26312289	1	137.2	21766797	26312289	A	C	1	1	0	0	1	0	0	0		1	0	0	0	0	0
Tf_Tl_S1_21766822_S1_26312314	1	137.2	21766822	26312314	T	C	1	0	0	0	1	0	0	0		0	0	0	0	0	0
Tf_S1_21838960	1	137.2	21838960	NA	G	C	1	0	0	0	1	0	0	0		0	0	0	0	0	0
Tf_S1_21842289	1	137.2	21842289	NA	T	-	1	0	0	0	1	0	0	0		0	0	0	0	0	0
Tf_S1_21842291	1	137.2	21842291	NA	T	G	3	3	1	0	1	0	0	1		0	0	1	0	1	1
Tf_Tl_S1_21847771_S1_26403003	1	137.2	21847771	26403003	C	T	0	1	0	0	0	0	0	0		0	0	0	1	0	0
Tf_Tl_S1_21848445_S1_26403691	1	137.2	21848445	26403691	-	G	1	0	0	0	0	0	1	0		0	0	0	0	0	0
Tf_Tl_S1_21848448_S1_26403697	1	137.2	21848448	26403697	-	T	1	0	0	0	0	0	1	0		0	0	0	0	0	0
Tf_Tl_S1_21848634_S1_26403875	1	137.2	21848634	26403875	C	T	1	0	0	0	1	0	0	0		0	0	0	0	0	0
Tf_S1_21848650	1	137.2	21848650	NA	C	T	2	1	0	0	1	0	1	0		0	0	0	0	0	1
Tl_S1_26403891	1	137.2	NA	26403891	C	T	2	1	0	0	1	0	1	0		0	0	0	0	0	1
Tf_S1_21883500	1	137.4	21883500	NA	T	C	0	2	0	0	0	0	0	0		1	1	0	0	0	0
Tl_S1_26440997	1	137.4	NA	26440997	T	C	0	2	0	0	0	0	0	0		1	1	0	0	0	0
Tf_Tl_S1_21891738_S1_26450561	1	137.5	21891738	26450561	A	G	2	4	0	0	1	0	1	0		1	1	1	0	0	1
Tf_Tl_S1_21891749_S1_26450572	1	137.5	21891749	26450572	C	G	0	3	0	0	0	0	0	0		1	1	1	0	0	0
Tf_Tl_S1_21937485_S1_26502739	1	137.8	21937485	26502739	T	A	0	2	0	0	0	0	0	0		1	1	0	0	0	0
Tf_Tl_S1_21946637_S1_26514276	1	137.8	21946637	26514276	A	G	1	1	0	0	1	0	0	0		0	0	0	0	0	1
Tf_Tl_S1_21946638_S1_26514277	1	137.8	21946638	26514277	G	T	3	2	1	0	0	0	1	1		0	0	0	1	1	0
Tf_Tl_S1_21987319_S1_26583223	1	137.8	21987319	26583223	G	A	2	0	0	1	0	1	0	0		0	0	0	0	0	0
Tf_Tl_S1_21987348_S1_26583252	1	138.1	21987348	26583252	G	A	1	3	0	0	1	0	0	0		0	0	1	1	0	1
Tf_Tl_S1_21992091_S1_26591225	1	138.1	21992091	26591225	A	T	0	2	0	0	0	0	0	0		1	1	0	0	0	0
Tf_Tl_S1_21992099_S1_26591233	1	138.1	21992099	26591233	T	-	0	1	0	0	0	0	0	0		0	0	0	1	0	0
Tf_S1_22062377	1	138.5	22062377	NA	T	A	1	3	0	0	0	0	1	0		1	1	1	0	0	0
Tl_S1_26676626	1	138.5	NA	26676626	G	C	1	3	0	0	0	0	1	0		1	1	1	0	0	0
Tf_S1_22062390	1	138.5	22062390	NA	G	C	1	3	0	0	0	0	1	0		1	1	1	0	0	0
Tl_S1_26677105	1	138.9	NA	26677105	T	C	2	1	1	0	0	0	0	1		0	0	0	0	1	0
Tf_S1_22062865	1	138.9	22062865	NA	T	C	2	1	1	0	0	0	0	1		0	0	0	0	1	0
Tf_Tl_S1_22077567_S1_26692560	1	139.2	22077567	26692560	T	C	0	1	0	0	0	0	0	0		0	0	1	0	0	0
Tf_Tl_S1_22077602_S1_26692595	1	139.3	22077602	26692595	T	G	1	2	0	0	1	0	0	0		0	0	0	1	0	1
Tf_S1_22187065	1	140	22187065	NA	-	A	1	0	0	0	0	0	1	0		0	0	0	0	0	0
Tf_S1_22187067	1	140	22187067	NA	-	C	1	0	0	0	0	0	1	0		0	0	0	0	0	0
Tf_Tl_S1_22201152_S1_26799055	1	140	22201152	26799055	A	G	0	1	0	0	0	0	0	0		0	0	1	0	0	0
Tf_Tl_S1_22212737_S1_26810094	1	140	22212737	26810094	C	-	0	2	0	0	0	0	0	0		1	0	1	0	0	0
Tf_S1_22212770	1	140	22212770	NA	G	A	0	1	0	0	0	0	0	0		0	0	1	0	0	0
Tl_S1_26810127	1	140	NA	26810127	G	A	0	1	0	0	0	0	0	0		0	0	1	0	0	0
Tf_Tl_S1_22235442_S1_26829113	1	140.2	22235442	26829113	T	A	1	0	1	0	0	0	0	0		0	0	0	0	0	0
Tl_S1_26878920	1	140.2	NA	26878920	G	C	0	1	0	0	0	0	0	0		0	1	0	0	0	0
Tf_S1_22255273	1	140.2	22255273	NA	G	C	0	1	0	0	0	0	0	0		0	1	0	0	0	0
Tf_S1_22255291	1	140.4	22255291	NA	C	T	1	3	1	0	0	0	0	0		1	1	1	0	0	0
Tl_S1_26878938	1	140.4	NA	26878938	C	T	1	3	1	0	0	0	0	0		1	1	1	0	0	0
Tf_S1_22255306	1	140.4	22255306	NA	G	C	0	1	0	0	0	0	0	0		0	0	1	0	0	0
Tl_S1_26878953	1	140.4	NA	26878953	G	C	0	1	0	0	0	0	0	0		0	0	1	0	0	0
Tf_Tl_S1_22262470_S1_26885165	1	140.6	22262470	26885165	T	C	1	0	0	0	0	0	1	0		0	0	0	0	0	0
Tf_Tl_S1_22279452_S1_26900997	1	140.6	22279452	26900997	G	T	1	1	0	0	1	0	0	0		0	0	0	0	0	1
Tf_Tl_S1_22281653_S1_26903271	1	140.6	22281653	26903271	G	A	1	0	0	0	0	0	1	0		0	0	0	0	0	0
Tf_Tl_S1_22300769_S1_26918638	1	140.6	22300769	26918638	C	T	1	1	0	0	1	0	0	0		0	0	0	0	0	1
Tf_Tl_S1_22300791_S1_26918660	1	141.1	22300791	26918660	C	T	0	1	0	0	0	0	0	0		0	0	0	1	0	0
Tf_S1_22306428	1	141.1	22306428	NA	A	-	2	1	1	0	0	0	1	0		1	0	0	0	0	0
Tf_S1_22306479	1	141.1	22306479	NA	A	T	3	2	1	0	0	0	1	1		1	0	0	0	1	0
Tf_S1_22306482	1	141.4	22306482	NA	T	-	0	1	0	0	0	0	0	0		0	0	0	1	0	0
Tf_Tl_S1_22334649_S1_26960935	1	141.7	22334649	26960935	T	C	1	0	0	0	0	0	1	0		0	0	0	0	0	0
Tf_S1_22350733	1	141.7	22350733	NA	A	G	0	1	0	0	0	0	0	0		1	0	0	0	0	0
Tf_Tl_S1_22364997_S1_27109500	1	141.7	22364997	27109500	C	G	0	1	0	0	0	0	0	0		1	0	0	0	0	0
Tl_S1_27109535	1	141.7	NA	27109535	-	T	2	1	1	0	0	0	1	0		1	0	0	0	0	0
Tl_S1_27125502	1	141.7	NA	27125502	T	C	0	1	0	0	0	0	0	0		1	0	0	0	0	0
Tf_Tl_S1_22365014_S1_27109483	1	141.7	22365014	27109483	A	G	2	0	1	0	0	0	1	0		0	0	0	0	0	0
Tl_S1_27047398	1	141.7	NA	27047398	T	-	0	1	0	0	0	0	0	0		0	0	0	1	0	0
Tf_Tl_S1_22365015_S1_27109482	1	141.7	22365015	27109482	G	C	1	1	0	0	0	0	0	1		0	0	0	0	1	0
Tl_S1_27047427	1	141.7	NA	27047427	-	T	0	1	0	0	0	0	0	0		0	0	0	1	0	0
Tf_Tl_S1_22366131_S1_27107454	1	141.7	22366131	27107454	G	A	1	0	0	0	0	0	1	0		0	0	0	0	0	0
Tf_Tl_S1_22415841_S1_27162650	1	142.1	22415841	27162650	G	C	1	2	0	0	1	0	0	0		0	0	0	1	0	1
Tf_Tl_S1_22415849_S1_27162658	1	142.1	22415849	27162658	T	A	1	2	0	0	1	0	0	0		0	0	0	1	0	1
Tf_Tl_S1_22415858_S1_27162666	1	142.1	22415858	27162666	-	A	1	2	0	0	1	0	0	0		0	0	0	1	0	1
Tf_Tl_S1_22426676_S1_27171186	1	142.2	22426676	27171186	T	C	1	0	0	1	0	0	0	0		0	0	0	0	0	0
Tf_Tl_S1_22426680_S1_27171190	1	142.6	22426680	27171190	C	T	3	2	1	1	0	0	1	0		1	0	0	1	0	0
Tf_Tl_S1_22426683_S1_27171193	1	142.6	22426683	27171193	A	G	3	2	1	1	0	0	1	0		1	0	0	1	0	0
Tl_S1_27238154	1	142.6	NA	27238154	G	T	2	0	1	0	1	0	0	0		0	0	0	0	0	0
Tl_S1_27238155	1	142.6	NA	27238155	C	T	0	1	0	0	0	0	0	0		0	0	0	1	0	0
Tf_Tl_S1_22519308_S1_27317995	1	142.7	22519308	27317995	C	A	1	0	0	1	0	0	0	0		0	0	0	0	0	0
Tl_S1_27401315	1	143	NA	27401315	C	A	1	1	1	0	0	0	0	0		0	0	0	0	0	1
Tl_S1_27403789	1	143	NA	27403789	T	C	1	1	1	0	0	0	0	0		0	0	0	0	0	1
Tl_S1_27403811	1	143	NA	27403811	C	A	1	1	1	0	0	0	0	0		0	0	0	0	0	1
Tf_S1_22527835	1	143	22527835	NA	A	T	1	1	0	0	0	0	1	0		1	0	0	0	0	0
Tf_S1_22603536	1	143	22603536	NA	C	A	1	1	1	0	0	0	0	0		0	0	0	0	0	1
Tf_S1_22606042	1	143	22606042	NA	T	C	1	1	1	0	0	0	0	0		0	0	0	0	0	1
Tf_S1_22606064	1	143	22606064	NA	C	A	1	1	1	0	0	0	0	0		0	0	0	0	0	1
Tf_Tl_S1_22653068_S1_27451272	1	144.1	22653068	27451272	A	C	1	0	0	0	0	0	1	0		0	0	0	0	0	0
Tl_S1_27451310	1	144.2	NA	27451310	A	-	1	0	0	0	0	0	1	0		0	0	0	0	0	0
Tl_S1_27451311	1	144.2	NA	27451311	-	T	1	0	0	0	0	0	1	0		0	0	0	0	0	0
Tf_Tl_S1_22662029_S1_27459399	1	144.2	22662029	27459399	T	A	0	1	0	0	0	0	0	0		0	0	0	1	0	0
Tf_S1_22662050	1	144.2	22662050	NA	C	T	2	1	0	0	1	1	0	0		0	0	1	0	0	0
Tl_S1_27459420	1	144.2	NA	27459420	C	T	2	1	0	0	1	1	0	0		0	0	1	0	0	0
Tf_Tl_S1_22662070_S1_27459440	1	144.2	22662070	27459440	C	T	2	1	0	0	1	1	0	0		0	0	1	0	0	0
Tf_Tl_S1_22683970_S1_27490485	1	144.2	22683970	27490485	A	G	1	0	0	0	0	0	1	0		0	0	0	0	0	0
Tf_Tl_S1_22684000_S1_27490515	1	144.2	22684000	27490515	G	T	0	1	0	0	0	0	0	0		0	0	0	1	0	0
Tf_Tl_S1_22757631_S1_27546377	1	145.6	22757631	27546377	A	C	1	0	0	0	1	0	0	0		0	0	0	0	0	0
Tf_Tl_S1_22774571_S1_27567756	1	145.6	22774571	27567756	A	G	1	0	0	0	1	0	0	0		0	0	0	0	0	0
Tf_Tl_S1_22785263_S1_27579422	1	145.6	22785263	27579422	T	A	1	0	0	0	1	0	0	0		0	0	0	0	0	0
Tf_Tl_S1_22788587_S1_27582728	1	145.7	22788587	27582728	C	A	1	1	0	1	0	0	0	0		0	1	0	0	0	0
Tl_S1_27633223	1	145.9	NA	27633223	T	C	1	0	0	0	0	0	0	1		0	0	0	0	0	0
Tl_S1_27638897	1	145.9	NA	27638897	G	A	1	0	0	0	0	0	1	0		0	0	0	0	0	0
Tf_S1_22831909	1	145.9	22831909	NA	C	G	0	1	0	0	0	0	0	0		1	0	0	0	0	0
Tl_S1_27642508	1	145.9	NA	27642508	C	G	0	1	0	0	0	0	0	0		1	0	0	0	0	0
Tf_Tl_S1_22872641_S1_27694865	1	145.9	22872641	27694865	C	G	0	1	0	0	0	0	0	0		0	1	0	0	0	0
Tf_Tl_S1_22878751_S1_27701048	1	146.5	22878751	27701048	A	C	0	1	0	0	0	0	0	0		1	0	0	0	0	0
Tf_S1_22882860	1	146.5	22882860	NA	C	G	3	0	0	0	0	1	1	1		0	0	0	0	0	0
Tf_S1_22882883	1	146.5	22882883	NA	T	C	3	0	0	0	0	1	1	1		0	0	0	0	0	0
Tf_S1_22882887	1	146.5	22882887	NA	C	T	3	0	0	0	0	1	1	1		0	0	0	0	0	0
Tf_S1_22882888	1	146.5	22882888	NA	C	T	3	0	0	0	0	1	1	1		0	0	0	0	0	0
Tf_Tl_S1_22933033_S1_27750750	1	146.6	22933033	27750750	C	T	2	0	0	0	0	1	0	1		0	0	0	0	0	0
Tf_Tl_S1_22933975_S1_27751673	1	146.6	22933975	27751673	G	C	1	0	0	0	0	0	1	0		0	0	0	0	0	0
Tf_Tl_S1_22933992_S1_27751690	1	146.9	22933992	27751690	A	G	1	1	0	1	0	0	0	0		0	1	0	0	0	0
Tf_Tl_S1_22933995_S1_27751693	1	146.9	22933995	27751693	C	G	2	0	0	0	0	1	0	1		0	0	0	0	0	0
Tf_Tl_S1_22938416_S1_27756102	1	146.9	22938416	27756102	T	A	0	1	0	0	0	0	0	0		1	0	0	0	0	0
Tf_Tl_S1_22940699_S1_27758367	1	146.9	22940699	27758367	T	A	0	1	0	0	0	0	0	0		1	0	0	0	0	0
Tf_S1_22953986	1	146.9	22953986	NA	A	G	1	0	0	0	1	0	0	0		0	0	0	0	0	0
Tf_S1_22954012	1	146.9	22954012	NA	C	G	1	0	0	0	1	0	0	0		0	0	0	0	0	0
Tf_Tl_S1_22959376_S1_27771171	1	146.9	22959376	27771171	G	T	1	1	0	1	0	0	0	0		0	1	0	0	0	0
Tf_Tl_S1_22960504_S1_27772292	1	146.9	22960504	27772292	T	C	2	0	0	0	0	1	0	1		0	0	0	0	0	0
Tf_Tl_S1_22961582_S1_27773366	1	146.9	22961582	27773366	A	T	2	0	0	0	0	1	0	1		0	0	0	0	0	0
Tl_S1_27782450	1	146.9	NA	27782450	T	G	1	1	0	0	1	0	0	0		1	0	0	0	0	0
Tf_S1_22969356	1	146.9	22969356	NA	T	G	1	1	0	0	1	0	0	0		1	0	0	0	0	0
Tf_S1_22993132	1	146.9	22993132	NA	G	A	1	0	0	0	1	0	0	0		0	0	0	0	0	0
Tl_S1_27809698	1	146.9	NA	27809698	G	C	1	0	0	0	1	0	0	0		0	0	0	0	0	0
Tf_S1_23012801	1	147.7	23012801	NA	C	G	1	0	0	1	0	0	0	0		0	0	0	0	0	0
Tl_S1_27831334	1	147.7	NA	27831334	C	G	1	0	0	1	0	0	0	0		0	0	0	0	0	0
Tl_S1_27858693	1	147.7	NA	27858693	T	C	4	1	0	1	0	1	1	1		1	0	0	0	0	0
Tf_S1_23040666	1	147.7	23040666	NA	T	C	4	1	0	1	0	1	1	1		1	0	0	0	0	0
Tl_S1_27858695	1	147.8	NA	27858695	C	T	1	4	1	0	0	0	0	0		0	1	1	1	1	0
Tl_S1_27858705	1	147.8	NA	27858705	G	A	1	0	0	1	0	0	0	0		0	0	0	0	0	0
Tf_S1_23040668	1	147.8	23040668	NA	C	T	1	4	1	0	0	0	0	0		0	1	1	1	1	0
Tf_S1_23040678	1	147.8	23040678	NA	G	A	1	0	0	1	0	0	0	0		0	0	0	0	0	0
Tf_Tl_S1_23040681_S1_27858708	1	147.8	23040681	27858708	G	A	2	0	0	0	0	1	0	1		0	0	0	0	0	0
Tf_S1_23040686	1	147.8	23040686	NA	T	A	1	4	1	0	0	0	0	0		0	1	1	1	1	0
Tf_S1_23040691	1	148.2	23040691	NA	T	A	1	0	0	0	0	0	1	0		0	0	0	0	0	0
Tl_S1_27858718	1	148.2	NA	27858718	T	A	1	0	0	0	0	0	1	0		0	0	0	0	0	0
Tf_S1_23040705	1	148.2	23040705	NA	C	T	2	0	0	0	0	1	0	1		0	0	0	0	0	0
Tf_S1_23040720	1	148.2	23040720	NA	T	C	0	1	0	0	0	0	0	0		1	0	0	0	0	0
Tl_S1_27858732	1	148.2	NA	27858732	C	T	2	0	0	0	0	1	0	1		0	0	0	0	0	0
Tl_S1_27858747	1	148.2	NA	27858747	T	C	0	1	0	0	0	0	0	0		1	0	0	0	0	0
Tf_Tl_S1_23067844_S1_27892537	1	148.2	23067844	27892537	G	A	1	0	0	0	0	0	1	0		0	0	0	0	0	0
Tf_Tl_S1_23069084_S1_27893801	1	148.2	23069084	27893801	T	G	0	1	0	0	0	0	0	0		0	1	0	0	0	0
Tf_Tl_S1_23072032_S1_27904642	1	148.2	23072032	27904642	T	G	1	0	0	1	0	0	0	0		0	0	0	0	0	0
Tf_Tl_S1_23098337_S1_27933185	1	148.6	23098337	27933185	C	T	0	3	0	0	0	0	0	0		0	0	1	1	1	0
Tf_Tl_S1_23098349_S1_27933197	1	148.6	23098349	27933197	T	A	2	0	0	0	0	1	0	1		0	0	0	0	0	0
Tl_S1_27933224	1	148.6	NA	27933224	C	G	0	3	0	0	0	0	0	0		0	0	1	1	1	0
Tf_Tl_S1_23098376_S1_27933229	1	148.6	23098376	27933229	C	G	0	3	0	0	0	0	0	0		0	0	1	1	1	0
Tf_Tl_S1_23098380_S1_27933228	1	148.6	23098380	27933228	C	G	0	3	0	0	0	0	0	0		0	0	1	1	1	0
Tl_S1_27933241	1	148.6	NA	27933241	-	T	2	2	0	0	0	1	0	1		0	1	0	0	0	1
Tf_Tl_S1_23121697_S1_27947762	1	148.6	23121697	27947762	G	T	0	1	0	0	0	0	0	0		0	0	0	0	0	1
Tf_Tl_S1_23121701_S1_27947766	1	148.6	23121701	27947766	G	C	0	3	0	0	0	0	0	0		0	0	1	1	1	0
Tf_Tl_S1_23121702_S1_27947767	1	148.6	23121702	27947767	C	A	2	0	0	0	0	1	0	1		0	0	0	0	0	0
Tf_S1_23124836	1	149	23124836	NA	T	G	0	3	0	0	0	0	0	0		0	0	1	1	1	0
Tf_Tl_S1_23131716_S1_27961216	1	149	23131716	27961216	T	C	2	4	0	0	0	1	0	1		0	0	1	1	1	1
Tf_Tl_S1_23131737_S1_27961237	1	149.6	23131737	27961237	A	G	1	1	0	0	1	0	0	0		0	1	0	0	0	0
Tf_S1_23137288	1	149.6	23137288	NA	C	T	1	0	0	1	0	0	0	0		0	0	0	0	0	0
Tl_S1_27966991	1	149.6	NA	27966991	C	T	1	0	0	1	0	0	0	0		0	0	0	0	0	0
Tf_Tl_S1_23153787_S1_27984951	1	149.6	23153787	27984951	T	C	0	3	0	0	0	0	0	0		0	0	1	1	1	0
Tf_Tl_S1_23157469_S1_27988634	1	149.6	23157469	27988634	T	C	0	3	0	0	0	0	0	0		0	0	1	1	1	0
Tf_Tl_S1_23212821_S1_28047048	1	149.7	23212821	28047048	T	A	1	0	0	0	0	0	1	0		0	0	0	0	0	0
Tf_Tl_S1_23213485_S1_28047709	1	149.8	23213485	28047709	G	A	1	0	0	0	1	0	0	0		0	0	0	0	0	0
Tf_S1_23214120	1	150	23214120	NA	A	C	2	1	0	1	0	0	1	0		0	1	0	0	0	0
Tf_S1_23214125	1	150	23214125	NA	A	G	1	0	0	1	0	0	0	0		0	0	0	0	0	0
Tf_S1_23214137	1	150	23214137	NA	A	G	3	2	0	1	1	0	1	0		0	1	0	0	0	1
Tf_S1_23214158	1	150	23214158	NA	C	T	1	1	0	0	1	0	0	0		0	0	0	0	0	1
Tf_Tl_S1_23220702_S1_28070449	1	150	23220702	28070449	A	G	1	1	0	0	1	0	0	0		0	0	0	0	0	1
Tf_Tl_S1_23222869_S1_28072647	1	150.3	23222869	28072647	-	C	1	0	0	0	0	0	1	0		0	0	0	0	0	0
Tl_S1_28072670	1	150.3	NA	28072670	T	-	1	0	0	0	0	0	1	0		0	0	0	0	0	0
Tf_S1_23222892	1	150.3	23222892	NA	T	-	1	0	0	0	0	0	1	0		0	0	0	0	0	0
Tf_S1_23222894	1	150.3	23222894	NA	G	T	1	0	0	0	0	0	1	0		0	0	0	0	0	0
Tf_Tl_S1_23270017_S1_28107504	1	150.5	23270017	28107504	C	G	1	0	0	1	0	0	0	0		0	0	0	0	0	0
Tf_Tl_S1_23272252_S1_28109603	1	150.5	23272252	28109603	G	C	1	1	1	0	0	0	0	0		1	0	0	0	0	0
Tf_Tl_S1_23272275_S1_28109626	1	150.5	23272275	28109626	T	G	1	1	0	1	0	0	0	0		0	1	0	0	0	0
Tf_Tl_S1_23272278_S1_28109629	1	150.6	23272278	28109629	G	A	1	0	0	0	1	0	0	0		0	0	0	0	0	0
Tf_Tl_S1_23272290_S1_28109641	1	150.6	23272290	28109641	A	G	1	0	0	0	1	0	0	0		0	0	0	0	0	0
Tf_Tl_S1_23280702_S1_28117545	1	150.7	23280702	28117545	C	G	2	1	1	1	0	0	0	0		1	0	0	0	0	0
Tf_Tl_S1_23280703_S1_28117546	1	150.7	23280703	28117546	A	G	2	1	1	1	0	0	0	0		1	0	0	0	0	0
Tf_Tl_S1_23280735_S1_28117578	1	150.9	23280735	28117578	C	A	1	1	1	0	0	0	0	0		1	0	0	0	0	0
Tf_Tl_S1_23280738_S1_28117581	1	151.3	23280738	28117581	A	G	1	1	0	0	0	0	1	0		0	1	0	0	0	0
Tf_S1_23280747	1	151.3	23280747	NA	A	G	2	4	0	0	0	1	0	1		0	1	1	1	1	0
Tl_S1_28117590	1	151.3	NA	28117590	A	G	2	4	0	0	0	1	0	1		0	1	1	1	1	0
Tf_Tl_S1_23281950_S1_28118787	1	151.3	23281950	28118787	A	C	0	1	0	0	0	0	0	0		0	1	0	0	0	0
Tf_Tl_S1_23281954_S1_28118791	1	151.3	23281954	28118791	G	C	0	1	0	0	0	0	0	0		0	1	0	0	0	0
Tf_Tl_S1_23281959_S1_28118796	1	151.3	23281959	28118796	-	A	3	2	1	1	1	0	0	0		1	0	0	0	0	1
Tf_Tl_S1_23281986_S1_28118823	1	151.3	23281986	28118823	T	-	3	2	1	1	1	0	0	0		1	0	0	0	0	1
Tl_S1_28126436	1	152.5	NA	28126436	T	A	2	2	0	0	0	1	0	1		0	0	0	1	1	0
Tl_S1_28126442	1	152.5	NA	28126442	C	T	2	2	0	0	0	1	0	1		0	0	0	1	1	0
Tl_S1_28126457	1	152.5	NA	28126457	T	C	2	2	0	0	0	1	0	1		0	0	0	1	1	0
Tl_S1_28126458	1	152.5	NA	28126458	C	T	1	0	0	0	1	0	0	0		0	0	0	0	0	0
Tf_S1_23288954	1	152.5	23288954	NA	T	A	2	2	0	0	0	1	0	1		0	0	0	1	1	0
Tf_S1_23288976	1	152.5	23288976	NA	C	T	1	0	0	0	1	0	0	0		0	0	0	0	0	0
Tf_S1_23293121	1	152.5	23293121	NA	A	T	1	0	0	0	1	0	0	0		0	0	0	0	0	0
Tf_S1_23293139	1	153.6	23293139	NA	A	G	1	2	0	1	0	0	0	0		0	1	0	0	0	1
Tf_S1_23297279	1	153.6	23297279	NA	G	A	2	1	0	1	1	0	0	0		0	1	0	0	0	0
Tl_S1_28136056	1	153.6	NA	28136056	G	A	2	1	0	1	1	0	0	0		0	1	0	0	0	0
Tf_Tl_S1_23297311_S1_28136088	1	153.7	23297311	28136088	G	A	1	1	0	1	0	0	0	0		0	1	0	0	0	0
Tl_S1_28179236	1	154	NA	28179236	A	T	1	0	0	1	0	0	0	0		0	0	0	0	0	0
Tf_S1_23344548	1	154	23344548	NA	A	T	1	0	0	1	0	0	0	0		0	0	0	0	0	0
Tf_S1_23344556	1	154	23344556	NA	A	T	1	0	0	1	0	0	0	0		0	0	0	0	0	0
Tl_S1_28179244	1	154	NA	28179244	A	T	1	0	0	1	0	0	0	0		0	0	0	0	0	0
Tf_S1_23411072	1	154.5	23411072	NA	A	T	1	2	0	1	0	0	0	0		0	1	0	0	0	1
Tl_S1_28228727	1	155.3	NA	28228727	G	A	1	2	1	0	0	0	0	0		0	0	0	1	1	0
Tf_S1_23411080	1	155.3	23411080	NA	G	A	1	2	1	0	0	0	0	0		0	0	0	1	1	0
Tl_S1_28284652	1	155.4	NA	28284652	T	-	1	0	0	1	0	0	0	0		0	0	0	0	0	0
Tl_S1_28284695	1	155.4	NA	28284695	C	-	1	0	0	1	0	0	0	0		0	0	0	0	0	0
Tl_S1_28284697	1	155.4	NA	28284697	-	A	1	0	0	1	0	0	0	0		0	0	0	0	0	0
Tl_S1_28284698	1	155.4	NA	28284698	-	A	1	0	0	1	0	0	0	0		0	0	0	0	0	0
Tf_S1_23497165	1	155.4	23497165	NA	A	G	0	1	0	0	0	0	0	0		0	0	0	0	0	1
Tl_S1_28321803	1	155.6	NA	28321803	T	C	1	1	0	1	0	0	0	0		0	0	1	0	0	0
Tl_S1_28321831	1	155.6	NA	28321831	A	G	0	1	0	0	0	0	0	0		0	0	0	0	0	1
Tl_S1_28321849	1	155.6	NA	28321849	A	G	1	0	0	1	0	0	0	0		0	0	0	0	0	0
Tf_S1_23497183	1	155.6	23497183	NA	A	G	1	0	0	1	0	0	0	0		0	0	0	0	0	0
Tf_Tl_S1_23554668_S1_28368069	1	155.8	23554668	28368069	C	T	1	0	0	1	0	0	0	0		0	0	0	0	0	0
Tf_Tl_S1_23554669_S1_28368070	1	155.8	23554669	28368070	G	C	0	1	0	0	0	0	0	0		0	1	0	0	0	0
Tf_Tl_S1_23554673_S1_28368074	1	155.8	23554673	28368074	T	A	1	3	1	0	0	0	0	0		0	0	0	1	1	1
Tf_Tl_S1_23560414_S1_28373719	1	155.8	23560414	28373719	T	C	1	3	1	0	0	0	0	0		0	0	0	1	1	1
Tf_Tl_S1_23570877_S1_28386434	1	156	23570877	28386434	T	C	1	3	1	0	0	0	0	0		0	0	0	1	1	1
Tf_Tl_S1_23570878_S1_28386435	1	156	23570878	28386435	G	A	1	3	1	0	0	0	0	0		0	0	0	1	1	1
Tf_Tl_S1_23570919_S1_28386476	1	156	23570919	28386476	T	C	1	3	1	0	0	0	0	0		0	0	0	1	1	1
Tf_Tl_S1_23574847_S1_28390459	1	156	23574847	28390459	T	C	1	3	1	0	0	0	0	0		0	0	0	1	1	1
Tl_S1_28909939	1	156.8	NA	28909939	G	A	3	1	0	0	1	1	0	1		1	0	0	0	0	0
Tf_S1_23585849	1	156.8	23585849	NA	G	A	3	1	0	0	1	1	0	1		1	0	0	0	0	0
Tl_S1_28909948	1	156.8	NA	28909948	G	A	3	1	0	0	1	1	0	1		1	0	0	0	0	0
Tf_S1_23585858	1	156.8	23585858	NA	G	A	3	1	0	0	1	1	0	1		1	0	0	0	0	0
Tf_Tl_S1_23589864_S1_28913909	1	156.8	23589864	28913909	C	T	0	1	0	0	0	0	0	0		0	1	0	0	0	0
Tf_Tl_S1_23589882_S1_28913927	1	156.8	23589882	28913927	T	C	1	0	0	1	0	0	0	0		0	0	0	0	0	0
Tf_Tl_S1_23589930_S1_28913975	1	156.8	23589930	28913975	A	T	0	1	0	0	0	0	0	0		0	1	0	0	0	0
Tf_Tl_S1_23589982_S1_28914027	1	157.1	23589982	28914027	T	C	1	2	0	0	0	0	1	0		0	1	1	0	0	0
Tf_Tl_S1_23658521_S1_28974151	1	157.3	23658521	28974151	C	A	3	0	0	0	1	1	0	1		0	0	0	0	0	0
Tf_Tl_S1_23787545_S1_29059705	1	157.3	23787545	29059705	T	C	3	0	0	0	1	1	0	1		0	0	0	0	0	0
Tf_Tl_S1_23788701_S1_29060871	1	157.5	23788701	29060871	-	C	1	0	0	0	0	0	1	0		0	0	0	0	0	0
Tf_Tl_S1_23788723_S1_29060893	1	157.5	23788723	29060893	A	-	1	0	0	0	0	0	1	0		0	0	0	0	0	0
Tf_Tl_S1_23817853_S1_29098823	1	157.5	23817853	29098823	G	A	3	0	0	0	1	1	0	1		0	0	0	0	0	0
Tf_Tl_S1_23819030_S1_29100000	1	157.5	23819030	29100000	C	T	3	0	0	0	1	1	0	1		0	0	0	0	0	0
Tf_Tl_S1_23819040_S1_29100010	1	157.5	23819040	29100010	T	A	1	0	0	0	0	0	1	0		0	0	0	0	0	0
Tf_Tl_S1_23825902_S1_29106673	1	157.5	23825902	29106673	C	T	1	0	0	0	0	0	1	0		0	0	0	0	0	0
Tf_Tl_S1_23880965_S1_29169261	1	157.7	23880965	29169261	T	C	0	1	0	0	0	0	0	0		0	0	1	0	0	0
Tf_S1_23884999	1	157.7	23884999	NA	T	-	0	4	0	0	0	0	0	0		1	1	1	0	0	1
Tf_Tl_S1_23885041_S1_29173356	1	157.8	23885041	29173356	A	-	4	0	0	0	1	1	1	1		0	0	0	0	0	0
Tl_S1_29199174	1	158	NA	29199174	C	G	0	1	0	0	0	0	0	0		0	0	1	0	0	0
Tf_Tl_S1_23937004_S1_29221764	1	158.1	23937004	29221764	C	T	0	2	0	0	0	0	0	0		1	0	0	0	0	1
Tf_S1_23937028	1	158.1	23937028	NA	T	C	2	0	0	0	0	1	0	1		0	0	0	0	0	0
Tl_S1_29221788	1	158.1	NA	29221788	T	C	2	0	0	0	0	1	0	1		0	0	0	0	0	0
Tf_Tl_S1_23940297_S1_29224804	1	158.1	23940297	29224804	G	A	0	2	0	0	0	0	0	0		0	1	1	0	0	0
Tf_Tl_S1_23944018_S1_29228303	1	158.1	23944018	29228303	A	G	1	0	0	0	0	0	1	0		0	0	0	0	0	0
Tf_Tl_S1_23944045_S1_29228330	1	158.1	23944045	29228330	T	G	1	0	0	0	0	0	1	0		0	0	0	0	0	0
Tf_Tl_S1_23950802_S1_29239816	1	158.1	23950802	29239816	A	G	2	0	0	0	0	1	0	1		0	0	0	0	0	0
Tf_Tl_S1_23976566_S1_29267064	1	158.1	23976566	29267064	G	A	1	0	0	0	0	0	1	0		0	0	0	0	0	0
Tf_Tl_S1_23976602_S1_29267100	1	158.3	23976602	29267100	G	A	2	1	0	0	0	1	0	1		1	0	0	0	0	0
Tf_Tl_S1_24033209_S1_29323516	1	158.9	24033209	29323516	A	T	1	0	0	0	1	0	0	0		0	0	0	0	0	0
Tf_Tl_S1_24050007_S1_29340201	1	158.9	24050007	29340201	G	A	1	0	0	0	1	0	0	0		0	0	0	0	0	0
Tf_Tl_S1_24050008_S1_29340202	1	158.9	24050008	29340202	A	G	1	0	0	0	1	0	0	0		0	0	0	0	0	0
Tl_S1_29343458	1	158.9	NA	29343458	G	A	1	1	0	0	0	0	1	0		0	0	1	0	0	0
Tf_S1_24053244	1	158.9	24053244	NA	G	A	1	1	0	0	0	0	1	0		0	0	1	0	0	0
Tf_Tl_S1_24070068_S1_29359578	1	159	24070068	29359578	C	T	1	1	0	0	0	0	1	0		0	0	1	0	0	0
Tf_Tl_S1_24070084_S1_29359596	1	159	24070084	29359596	C	T	1	0	0	0	1	0	0	0		0	0	0	0	0	0
Tf_Tl_S1_24079050_S1_29367382	1	159	24079050	29367382	G	A	2	1	0	0	0	1	0	1		1	0	0	0	0	0
Tf_Tl_S1_24079059_S1_29367391	1	159	24079059	29367391	G	T	0	1	0	0	0	0	0	0		0	0	1	0	0	0
Tf_Tl_S1_24082704_S1_29370706	1	159	24082704	29370706	C	T	1	1	0	0	0	0	1	0		0	0	1	0	0	0
Tf_Tl_S1_24082725_S1_29370727	1	159.1	24082725	29370727	T	C	1	0	0	0	1	0	0	0		0	0	0	0	0	0
Tf_Tl_S1_24101835_S1_29392852	1	159.2	24101835	29392852	C	T	0	2	0	0	0	0	0	0		0	1	0	0	0	1
Tf_Tl_S1_24101838_S1_29392855	1	159.2	24101838	29392855	A	G	0	2	0	0	0	0	0	0		0	1	0	0	0	1
Tf_Tl_S1_24123963_S1_29423092	1	159.3	24123963	29423092	G	A	1	1	0	0	1	0	0	0		0	0	1	0	0	0
Tf_S1_24145066	1	159.3	24145066	NA	C	T	2	1	0	0	0	1	0	1		1	0	0	0	0	0
Tl_S1_29440893	1	159.3	NA	29440893	T	A	0	1	0	0	0	0	0	0		0	0	0	0	0	1
Tl_S1_29445243	1	159.3	NA	29445243	C	T	2	1	0	0	0	1	0	1		1	0	0	0	0	0
Tf_S1_24145715	1	159.4	24145715	NA	G	C	1	0	0	0	0	0	1	0		0	0	0	0	0	0
Tl_S1_29445913	1	159.4	NA	29445913	G	C	1	0	0	0	0	0	1	0		0	0	0	0	0	0
Tf_S1_24151968	1	159.6	24151968	NA	G	-	1	0	0	0	0	0	1	0		0	0	0	0	0	0
Tf_Tl_S1_24178262_S1_29478572	1	159.6	24178262	29478572	A	G	1	0	0	0	0	0	1	0		0	0	0	0	0	0
Tf_Tl_S1_24178288_S1_29478598	1	159.6	24178288	29478598	T	G	1	0	0	0	0	0	1	0		0	0	0	0	0	0
Tf_Tl_S1_24178603_S1_29478913	1	159.6	24178603	29478913	T	C	1	0	0	0	0	0	1	0		0	0	0	0	0	0
Tf_S1_24192339	1	159.6	24192339	NA	G	A	1	0	0	0	0	0	1	0		0	0	0	0	0	0
Tl_S1_29491675	1	159.6	NA	29491675	G	A	1	0	0	0	0	0	1	0		0	0	0	0	0	0
Tl_S1_29491681	1	159.6	NA	29491681	G	A	1	0	0	0	0	0	1	0		0	0	0	0	0	0
Tf_S1_24192345	1	159.6	24192345	NA	G	A	1	0	0	0	0	0	1	0		0	0	0	0	0	0
Tf_S1_24192355	1	159.6	24192355	NA	C	A	1	0	0	0	0	0	1	0		0	0	0	0	0	0
Tl_S1_29491683	1	159.6	NA	29491683	T	A	2	0	0	0	1	0	1	0		0	0	0	0	0	0
Tl_S1_29491706	1	159.6	NA	29491706	T	C	0	1	0	0	0	0	0	0		0	0	0	1	0	0
Tf_Tl_S1_24193521_S1_29492860	1	159.6	24193521	29492860	T	A	1	0	0	0	0	0	1	0		0	0	0	0	0	0
Tf_S1_24202584	1	159.7	24202584	NA	T	G	0	1	0	0	0	0	0	0		0	1	0	0	0	0
Tf_S1_24202596	1	159.7	24202596	NA	C	-	0	1	0	0	0	0	0	0		0	1	0	0	0	0
Tl_S1_29514353	1	159.7	NA	29514353	G	A	0	1	0	0	0	0	0	0		0	0	0	1	0	0
Tf_S1_24202598	1	159.7	24202598	NA	T	C	0	1	0	0	0	0	0	0		0	1	0	0	0	0
Tf_Tl_S1_24223601_S1_29523039	1	159.7	24223601	29523039	T	C	1	1	0	0	0	0	1	0		1	0	0	0	0	0
Tf_Tl_S1_24223602_S1_29523040	1	159.7	24223602	29523040	G	A	1	0	0	0	0	0	1	0		0	0	0	0	0	0
Tf_Tl_S1_24253791_S1_29580758	1	159.7	24253791	29580758	C	A	0	1	0	0	0	0	0	0		0	0	0	1	0	0
Tf_Tl_S1_24253812_S1_29580779	1	159.7	24253812	29580779	A	G	0	1	0	0	0	0	0	0		0	1	0	0	0	0
Tf_Tl_S1_24264745_S1_29595745	1	159.7	24264745	29595745	A	T	0	1	0	0	0	0	0	0		0	1	0	0	0	0
Tf_Tl_S1_24266709_S1_29597706	1	159.9	24266709	29597706	A	T	0	1	0	0	0	0	0	0		0	1	0	0	0	0
Tf_Tl_S1_24266875_S1_29597873	1	160	24266875	29597873	G	C	0	1	0	0	0	0	0	0		0	1	0	0	0	0
Tf_Tl_S1_24266880_S1_29597878	1	160	24266880	29597878	-	G	0	1	0	0	0	0	0	0		0	1	0	0	0	0
Tf_Tl_S1_24288586_S1_29619866	1	160.2	24288586	29619866	T	C	5	1	1	1	1	1	0	1		0	0	0	0	1	0
Tf_Tl_S1_24288600_S1_29619880	1	160.2	24288600	29619880	T	C	1	0	0	0	0	0	1	0		0	0	0	0	0	0
Tf_Tl_S1_24288610_S1_29619890	1	160.2	24288610	29619890	G	A	0	2	0	0	0	0	0	0		0	1	0	1	0	0
Tf_Tl_S1_24288889_S1_29620169	1	160.2	24288889	29620169	A	G	0	1	0	0	0	0	0	0		0	0	0	1	0	0
Tf_Tl_S1_24296451_S1_29627839	1	160.2	24296451	29627839	T	G	0	1	0	0	0	0	0	0		1	0	0	0	0	0
Tf_Tl_S1_24296465_S1_29627853	1	160.2	24296465	29627853	G	A	0	1	0	0	0	0	0	0		0	0	0	0	0	1
Tf_S1_24301664	1	160.2	24301664	NA	A	C	0	1	0	0	0	0	0	0		1	0	0	0	0	0
Tf_S1_24318569	1	160.6	24318569	NA	G	A	4	0	0	0	1	1	1	1		0	0	0	0	0	0
Tf_S1_24318587	1	160.6	24318587	NA	G	C	0	1	0	0	0	0	0	0		0	0	1	0	0	0
Tl_S1_29646596	1	160.6	NA	29646596	T	C	0	1	0	0	0	0	0	0		0	0	1	0	0	0
Tl_S1_29651458	1	160.6	NA	29651458	G	A	4	0	0	0	1	1	1	1		0	0	0	0	0	0
Tl_S1_29651476	1	160.6	NA	29651476	G	C	0	1	0	0	0	0	0	0		0	0	1	0	0	0
Tf_Tl_S1_24318593_S1_29651482	1	160.7	24318593	29651482	A	C	0	2	0	0	0	0	0	0		0	0	0	1	0	1
Tf_Tl_S1_24326018_S1_29659002	1	160.7	24326018	29659002	G	T	3	0	0	0	0	1	1	1		0	0	0	0	0	0
Tl_S1_29664178	1	160.7	NA	29664178	G	A	1	0	0	0	0	0	1	0		0	0	0	0	0	0
Tl_S1_29664198	1	160.7	NA	29664198	C	A	1	0	0	0	0	0	1	0		0	0	0	0	0	0
Tf_Tl_S1_24352301_S1_29690524	1	160.9	24352301	29690524	-	G	2	4	1	1	0	0	0	0		0	1	0	1	1	1
Tf_Tl_S1_24352308_S1_29690531	1	160.9	24352308	29690531	A	G	4	2	0	0	1	1	1	1		1	0	1	0	0	0
Tf_Tl_S1_24352314_S1_29690537	1	160.9	24352314	29690537	T	C	1	0	0	0	1	0	0	0		0	0	0	0	0	0
Tf_Tl_S1_24352327_S1_29690550	1	161.2	24352327	29690550	G	A	2	0	0	0	0	1	0	1		0	0	0	0	0	0
Tf_Tl_S1_24352337_S1_29690560	1	161.2	24352337	29690560	A	T	4	2	0	0	1	1	1	1		1	0	1	0	0	0
Tf_Tl_S1_24352340_S1_29690563	1	161.2	24352340	29690563	G	A	2	3	1	1	0	0	0	0		0	0	0	1	1	1
Tf_Tl_S1_24354702_S1_29692931	1	161.2	24354702	29692931	T	C	1	0	0	0	0	0	1	0		0	0	0	0	0	0
Tf_Tl_S1_24354717_S1_29692946	1	161.2	24354717	29692946	C	A	1	0	0	0	0	0	1	0		0	0	0	0	0	0
Tf_Tl_S1_24360613_S1_29699668	1	161.2	24360613	29699668	T	A	4	0	0	0	1	1	1	1		0	0	0	0	0	0
Tf_Tl_S1_24360618_S1_29699673	1	161.2	24360618	29699673	A	T	0	1	0	0	0	0	0	0		0	1	0	0	0	0
Tf_Tl_S1_24363670_S1_29703209	1	161.2	24363670	29703209	A	G	2	0	0	0	0	1	0	1		0	0	0	0	0	0
Tf_Tl_S1_24380708_S1_29724069	1	161.2	24380708	29724069	G	A	0	2	0	0	0	0	0	0		0	0	0	1	0	1
Tf_Tl_S1_24383660_S1_29727071	1	161.2	24383660	29727071	G	A	0	2	0	0	0	0	0	0		0	1	1	0	0	0
Tf_Tl_S1_24400990_S1_29746180	1	161.3	24400990	29746180	A	C	0	1	0	0	0	0	0	0		0	0	1	0	0	0
Tf_Tl_S1_24400997_S1_29746187	1	161.3	24400997	29746187	A	T	2	2	1	1	0	0	0	0		0	0	1	0	1	0
Tf_Tl_S1_24406467_S1_29751004	1	161.3	24406467	29751004	T	G	0	1	0	0	0	0	0	0		0	1	0	0	0	0
Tf_Tl_S1_24406477_S1_29751014	1	161.3	24406477	29751014	C	G	1	2	0	0	0	0	1	0		0	1	1	0	0	0
Tf_Tl_S1_24406478_S1_29751015	1	161.3	24406478	29751015	C	G	1	2	0	0	0	0	1	0		0	1	1	0	0	0
Tf_Tl_S1_24406482_S1_29751019	1	161.3	24406482	29751019	C	T	0	1	0	0	0	0	0	0		0	0	1	0	0	0
Tl_S1_29761629	1	161.9	NA	29761629	C	T	0	1	0	0	0	0	0	0		0	0	1	0	0	0
Tf_S1_24416439	1	161.9	24416439	NA	C	T	0	1	0	0	0	0	0	0		0	0	1	0	0	0
Tf_Tl_S1_24419943_S1_29765038	1	161.9	24419943	29765038	C	G	1	1	1	0	0	0	0	0		0	0	0	0	1	0
Tl_S1_29776703	1	161.9	NA	29776703	C	A	0	2	0	0	0	0	0	0		0	0	0	1	0	1
Tf_Tl_S1_24444765_S1_29785570	1	161.9	24444765	29785570	G	T	2	0	0	0	0	1	0	1		0	0	0	0	0	0
Tf_Tl_S1_24460134_S1_29792120	1	162.4	24460134	29792120	T	C	1	1	1	0	0	0	0	0		0	0	0	0	1	0
Tf_Tl_S1_24460209_S1_29792195	1	162.4	24460209	29792195	G	A	1	1	1	0	0	0	0	0		0	0	0	0	1	0
Tf_Tl_S1_24460225_S1_29792211	1	162.4	24460225	29792211	T	C	1	2	1	0	0	0	0	0		0	1	0	0	1	0
Tl_S1_29802498	1	162.7	NA	29802498	T	C	3	2	0	1	0	1	0	1		0	0	0	1	0	1
Tf_S1_24468653	1	162.7	24468653	NA	T	-	2	1	1	0	1	0	0	0		0	0	0	0	1	0
Tl_S1_29802499	1	162.7	NA	29802499	-	A	2	1	1	0	1	0	0	0		0	0	0	0	1	0
Tf_Tl_S1_24474914_S1_29810564	1	162.9	24474914	29810564	A	T	1	3	0	1	0	0	0	0		1	0	0	1	0	1
Tf_Tl_S1_24481460_S1_29817114	1	162.9	24481460	29817114	G	A	0	1	0	0	0	0	0	0		0	0	1	0	0	0
Tf_S1_24505901	1	163	24505901	NA	T	A	1	1	0	0	1	0	0	0		0	1	0	0	0	0
Tf_Tl_S1_24505904_S1_29849850	1	163	24505904	29849850	C	T	1	1	0	0	1	0	0	0		0	1	0	0	0	0
Tf_Tl_S1_24505908_S1_29849854	1	163	24505908	29849854	A	G	1	1	0	0	1	0	0	0		0	1	0	0	0	0
Tl_S1_29849946	1	163.1	NA	29849946	-	A	1	4	0	1	0	0	0	0		1	0	1	1	0	1
Tf_Tl_S1_24506002_S1_29849948	1	163.3	24506002	29849948	T	A	1	2	0	0	1	0	0	0		0	1	1	0	0	0
Tf_Tl_S1_24506003_S1_29849949	1	163.3	24506003	29849949	T	A	0	1	0	0	0	0	0	0		0	0	1	0	0	0
Tf_Tl_S1_24506010_S1_29849956	1	163.3	24506010	29849956	C	T	0	1	0	0	0	0	0	0		0	0	0	0	0	1
Tl_S1_29868852	1	163.3	NA	29868852	A	G	1	0	0	0	1	0	0	0		0	0	0	0	0	0
Tl_S1_29868855	1	163.3	NA	29868855	C	T	1	0	0	0	1	0	0	0		0	0	0	0	0	0
Tl_S1_29869656	1	163.5	NA	29869656	C	T	3	0	0	0	0	1	1	1		0	0	0	0	0	0
Tf_Tl_S1_24582205_S1_29889520	1	163.5	24582205	29889520	C	T	1	0	0	0	1	0	0	0		0	0	0	0	0	0
Tf_Tl_S1_24585297_S1_29892630	1	163.5	24585297	29892630	C	T	1	0	0	0	1	0	0	0		0	0	0	0	0	0
Tf_Tl_S1_24601535_S1_29908179	1	163.5	24601535	29908179	A	-	1	0	0	0	1	0	0	0		0	0	0	0	0	0
Tf_Tl_S1_24601538_S1_29908182	1	163.5	24601538	29908182	-	A	1	0	0	0	1	0	0	0		0	0	0	0	0	0
Tf_Tl_S1_24601548_S1_29908192	1	163.5	24601548	29908192	T	A	1	0	0	0	1	0	0	0		0	0	0	0	0	0
Tf_Tl_S1_24609603_S1_29916846	1	164	24609603	29916846	C	T	0	1	0	0	0	0	0	0		0	0	0	1	0	0
Tl_S1_29919060	1	164	NA	29919060	C	T	4	1	1	0	0	1	1	1		0	0	0	0	1	0
Tl_S1_29919085	1	164	NA	29919085	C	A	4	1	1	0	0	1	1	1		0	0	0	0	1	0
Tl_S1_29921531	1	164	NA	29921531	A	G	1	1	0	1	0	0	0	0		1	0	0	0	0	0
Tf_S1_24611780	1	164	24611780	NA	C	T	4	1	1	0	0	1	1	1		0	0	0	0	1	0
Tf_S1_24611805	1	164	24611805	NA	C	A	4	1	1	0	0	1	1	1		0	0	0	0	1	0
Tf_Tl_S1_24624309_S1_29926588	1	164.5	24624309	29926588	G	A	1	0	0	0	1	0	0	0		0	0	0	0	0	0
Tf_Tl_S1_24660590_S1_29961984	1	164.6	24660590	29961984	T	C	2	2	1	0	1	0	0	0		0	0	0	0	1	1
Tf_Tl_S1_24660599_S1_29961993	1	164.6	24660599	29961993	C	T	2	2	1	0	1	0	0	0		0	0	0	0	1	1
Tf_S1_24682673	1	164.8	24682673	NA	G	A	1	1	1	0	0	0	0	0		0	0	0	0	1	0
Tf_S1_24682745	1	165.2	24682745	NA	T	A	0	1	0	0	0	0	0	0		0	1	0	0	0	0
Tf_S1_24684780	1	165.2	24684780	NA	G	A	2	3	0	1	0	0	1	0		1	0	0	1	0	1
Tf_Tl_S1_24742492_S1_30041157	1	165.5	24742492	30041157	G	-	0	1	0	0	0	0	0	0		0	0	1	0	0	0
Tf_Tl_S1_24748829_S1_30047546	1	165.5	24748829	30047546	G	A	2	1	0	0	0	1	0	1		0	0	0	1	0	0
Tf_S1_24770134	1	165.5	24770134	NA	G	T	0	1	0	0	0	0	0	0		0	1	0	0	0	0
Tl_S1_30070181	1	165.5	NA	30070181	G	T	0	1	0	0	0	0	0	0		0	1	0	0	0	0
Tf_Tl_S1_24770137_S1_30070184	1	165.5	24770137	30070184	A	T	0	1	0	0	0	0	0	0		0	1	0	0	0	0
Tf_Tl_S1_24783338_S1_30083431	1	165.5	24783338	30083431	A	T	2	4	1	0	1	0	0	0		0	1	1	0	1	1
Tf_Tl_S1_24783345_S1_30083438	1	165.5	24783345	30083438	C	T	2	4	1	0	1	0	0	0		0	1	1	0	1	1
Tf_S1_24784965	1	165.5	24784965	NA	A	G	0	1	0	0	0	0	0	0		0	0	1	0	0	0
Tf_Tl_S1_24785567_S1_30085613	1	165.5	24785567	30085613	C	A	0	1	0	0	0	0	0	0		0	0	1	0	0	0
Tl_S1_30085627	1	165.5	NA	30085627	G	A	2	3	1	0	1	0	0	0		0	1	0	0	1	1
Tf_S1_24785581	1	165.5	24785581	NA	G	A	2	3	1	0	1	0	0	0		0	1	0	0	1	1
Tl_S1_30085631	1	165.5	NA	30085631	C	T	2	4	1	0	1	0	0	0		0	1	1	0	1	1
Tf_S1_24785585	1	165.5	24785585	NA	C	T	2	4	1	0	1	0	0	0		0	1	1	0	1	1
Tf_S1_24791800	1	165.5	24791800	NA	T	-	1	0	0	0	0	0	1	0		0	0	0	0	0	0
Tf_S1_24791802	1	166.1	24791802	NA	C	T	1	1	1	0	0	0	0	0		0	0	0	0	1	0
Tf_S1_24791836	1	166.1	24791836	NA	A	-	1	1	1	0	0	0	0	0		0	0	0	0	1	0
Tf_Tl_S1_24841855_S1_30152504	1	166.3	24841855	30152504	G	A	2	1	0	0	0	1	0	1		0	0	0	1	0	0
Tf_Tl_S1_24841862_S1_30152511	1	166.3	24841862	30152511	A	-	2	1	0	0	0	1	0	1		0	0	0	1	0	0
Tf_Tl_S1_24876586_S1_30197211	1	166.7	24876586	30197211	A	G	0	1	0	0	0	0	0	0		1	0	0	0	0	0
Tf_Tl_S1_24884596_S1_30235973	1	166.7	24884596	30235973	C	G	0	1	0	0	0	0	0	0		1	0	0	0	0	0
Tf_Tl_S1_24892697_S1_30243643	1	166.7	24892697	30243643	A	T	0	1	0	0	0	0	0	0		1	0	0	0	0	0
Tf_Tl_S1_24906670_S1_30252590	1	166.7	24906670	30252590	C	A	0	1	0	0	0	0	0	0		0	0	0	1	0	0
Tf_S1_24918250	1	166.7	24918250	NA	A	G	0	1	0	0	0	0	0	0		0	0	0	1	0	0
Tf_Tl_S1_24976022_S1_30274475	1	166.7	24976022	30274475	G	C	0	1	0	0	0	0	0	0		0	0	0	1	0	0
Tf_Tl_S1_24976065_S1_30274518	1	166.7	24976065	30274518	-	T	2	0	0	0	0	1	0	1		0	0	0	0	0	0
Tf_Tl_S1_25016300_S1_30308959	1	166.7	25016300	30308959	C	T	0	1	0	0	0	0	0	0		1	0	0	0	0	0
Tf_Tl_S1_25019139_S1_30311980	1	166.7	25019139	30311980	G	A	0	1	0	0	0	0	0	0		1	0	0	0	0	0
Tf_Tl_S1_25019171_S1_30312012	1	166.7	25019171	30312012	A	T	0	1	0	0	0	0	0	0		0	0	1	0	0	0
Tf_Tl_S1_25047915_S1_30337732	1	166.7	25047915	30337732	C	T	2	0	0	0	0	1	0	1		0	0	0	0	0	0
Tf_Tl_S1_25047928_S1_30337745	1	166.7	25047928	30337745	T	G	2	3	0	1	0	0	1	0		0	1	1	0	0	1
Tf_Tl_S1_25055728_S1_30345797	1	166.9	25055728	30345797	G	A	0	1	0	0	0	0	0	0		0	1	0	0	0	0
Tf_Tl_S1_25055755_S1_30345824	1	166.9	25055755	30345824	T	C	0	1	0	0	0	0	0	0		0	0	0	1	0	0
Tl_S1_30434227	1	167.3	NA	30434227	-	T	0	1	0	0	0	0	0	0		1	0	0	0	0	0
Tf_Tl_S1_25134854_S1_30463646	1	167.3	25134854	30463646	C	T	2	1	1	0	1	0	0	0		0	0	0	0	1	0
Tl_S1_30463664	1	167.4	NA	30463664	T	A	4	1	0	1	0	1	1	1		0	0	0	0	0	1
Tf_S1_25161040	1	167.4	25161040	NA	A	T	2	0	0	0	0	1	0	1		0	0	0	0	0	0
Tf_S1_25161044	1	167.5	25161044	NA	G	T	2	3	0	1	0	0	1	0		0	0	1	1	0	1
Tf_S1_25161069	1	167.5	25161069	NA	G	A	0	2	0	0	0	0	0	0		0	0	1	1	0	0
Tf_Tl_S1_25175190_S1_30506949	1	167.8	25175190	30506949	C	A	2	1	0	0	0	1	0	1		0	0	0	1	0	0
Tf_Tl_S1_25175196_S1_30506955	1	167.8	25175196	30506955	T	G	2	1	0	0	0	1	0	1		0	0	0	1	0	0
Tl_S1_30506999	1	167.8	NA	30506999	-	C	2	1	0	0	0	1	0	1		0	0	0	1	0	0
Tf_Tl_S1_25224917_S1_30546552	1	168.3	25224917	30546552	C	T	3	3	0	0	0	1	1	1		1	1	1	0	0	0
Tf_Tl_S1_25229075_S1_30550778	1	168.3	25229075	30550778	C	T	0	1	0	0	0	0	0	0		0	0	1	0	0	0
Tl_S1_30554672	1	168.7	NA	30554672	A	G	0	1	0	0	0	0	0	0		0	0	0	1	0	0
Tl_S1_30554675	1	168.7	NA	30554675	A	G	0	1	0	0	0	0	0	0		0	0	0	1	0	0
Tf_S1_25230393	1	169	25230393	NA	G	T	0	1	0	0	0	0	0	0		0	0	0	1	0	0
Tf_S1_25230407	1	169	25230407	NA	C	A	0	1	0	0	0	0	0	0		0	0	0	1	0	0
Tf_S1_25230419	1	169	25230419	NA	C	G	0	1	0	0	0	0	0	0		0	0	0	1	0	0
Tf_Tl_S1_25241507_S1_30586964	1	169	25241507	30586964	G	A	0	1	0	0	0	0	0	0		0	0	0	1	0	0
Tf_Tl_S1_25241516_S1_30586973	1	169	25241516	30586973	T	C	1	0	0	1	0	0	0	0		0	0	0	0	0	0
Tf_Tl_S1_25244700_S1_30590184	1	169	25244700	30590184	T	C	1	0	0	1	0	0	0	0		0	0	0	0	0	0
Tf_Tl_S1_25263793_S1_30611746	1	169	25263793	30611746	G	T	1	1	0	0	0	0	1	0		1	0	0	0	0	0
Tf_Tl_S1_25263821_S1_30611774	1	169	25263821	30611774	T	G	1	1	0	0	0	0	1	0		1	0	0	0	0	0
Tf_Tl_S1_25271582_S1_30619393	1	169	25271582	30619393	A	G	1	0	0	1	0	0	0	0		0	0	0	0	0	0
Tf_Tl_S1_25271603_S1_30619414	1	169	25271603	30619414	T	C	2	3	1	0	1	0	0	0		0	0	0	1	1	1
Tf_Tl_S1_25284264_S1_30636372	1	169	25284264	30636372	T	A	0	1	0	0	0	0	0	0		0	0	0	1	0	0
Tf_Tl_S1_25284266_S1_30636374	1	169	25284266	30636374	G	T	0	1	0	0	0	0	0	0		0	0	0	1	0	0
Tf_Tl_S1_25336212_S1_30671309	1	169.4	25336212	30671309	A	G	2	1	1	1	0	0	0	0		0	0	0	0	1	0
Tf_Tl_S1_25336219_S1_30671316	1	169.4	25336219	30671316	A	G	1	1	0	0	0	0	1	0		1	0	0	0	0	0
Tf_Tl_S1_25354335_S1_30691860	1	169.7	25354335	30691860	A	-	0	2	0	0	0	0	0	0		0	1	1	0	0	0
Tf_Tl_S1_25354336_S1_30691861	1	169.7	25354336	30691861	-	A	0	2	0	0	0	0	0	0		0	1	1	0	0	0
Tf_Tl_S1_25383579_S1_30719342	1	170.3	25383579	30719342	T	A	2	1	0	0	0	1	0	1		0	0	0	1	0	0
Tf_Tl_S1_25401079_S1_30730608	1	170.3	25401079	30730608	A	G	2	0	0	1	0	0	1	0		0	0	0	0	0	0
Tf_Tl_S1_25401087_S1_30730616	1	170.3	25401087	30730616	T	C	2	2	1	0	1	0	0	0		0	0	0	0	1	1
Tf_Tl_S1_25439810_S1_30770810	1	170.6	25439810	30770810	G	A	1	0	0	0	1	0	0	0		0	0	0	0	0	0
Tf_Tl_S1_25445504_S1_30775843	1	170.7	25445504	30775843	G	T	2	2	0	0	0	1	0	1		0	0	0	1	0	1
Tl_S1_30856347	1	170.9	NA	30856347	A	-	1	2	0	0	1	0	0	0		1	1	0	0	0	0
Tl_S1_30856377	1	170.9	NA	30856377	A	T	1	0	0	0	1	0	0	0		0	0	0	0	0	0
Tl_S1_30856386	1	170.9	NA	30856386	-	T	1	2	0	0	1	0	0	0		1	1	0	0	0	0
Tf_S1_25570371	1	171	25570371	NA	T	-	0	1	0	0	0	0	0	0		1	0	0	0	0	0
Tf_S1_25570385	1	171	25570385	NA	-	T	0	2	0	0	0	0	0	0		1	0	0	0	0	1
Tf_Tl_S1_25572684_S1_30857543	1	171	25572684	30857543	G	A	1	2	0	0	1	0	0	0		1	1	0	0	0	0
Tf_Tl_S1_25608494_S1_30911351	1	171	25608494	30911351	A	T	1	0	0	0	1	0	0	0		0	0	0	0	0	0
Tf_Tl_S1_25608524_S1_30911381	1	171.2	25608524	30911381	C	G	0	2	0	0	0	0	0	0		1	0	0	0	0	1
Tf_Tl_S1_25630206_S1_30938432	1	171.2	25630206	30938432	G	A	0	3	0	0	0	0	0	0		0	1	1	0	0	1
Tf_Tl_S1_25630254_S1_30938480	1	171.2	25630254	30938480	T	G	2	1	0	0	0	1	0	1		0	0	0	1	0	0
Tf_Tl_S1_25664458_S1_30980602	1	171.3	25664458	30980602	A	T	0	1	0	0	0	0	0	0		1	0	0	0	0	0
Tf_Tl_S1_25668069_S1_30984092	1	171.5	25668069	30984092	C	T	0	2	0	0	0	0	0	0		0	1	1	0	0	0
Tf_Tl_S1_25669080_S1_30985117	1	171.5	25669080	30985117	C	T	0	1	0	0	0	0	0	0		1	0	0	0	0	0
Tl_S1_30994640	1	171.9	NA	30994640	C	T	0	1	0	0	0	0	0	0		0	0	1	0	0	0
Tf_Tl_S1_25680565_S1_30996536	1	171.9	25680565	30996536	T	A	0	1	0	0	0	0	0	0		0	1	0	0	0	0
Tf_Tl_S1_25682390_S1_30998378	1	172	25682390	30998378	G	A	1	0	0	1	0	0	0	0		0	0	0	0	0	0
Tf_Tl_S1_25682395_S1_30998383	1	172	25682395	30998383	G	A	0	2	0	0	0	0	0	0		1	0	0	0	0	1
Tf_Tl_S1_25682398_S1_30998386	1	172.1	25682398	30998386	A	T	0	1	0	0	0	0	0	0		0	0	0	0	0	1
Tf_Tl_S1_25683523_S1_30999512	1	172.1	25683523	30999512	A	G	0	1	0	0	0	0	0	0		0	0	0	0	0	1
Tf_Tl_S1_25683525_S1_30999514	1	172.1	25683525	30999514	A	G	2	1	0	1	0	0	1	0		0	0	0	0	0	1
Tf_Tl_S1_25683527_S1_30999516	1	172.1	25683527	30999516	A	T	0	1	0	0	0	0	0	0		1	0	0	0	0	0
Tf_Tl_S1_25683550_S1_30999539	1	172.1	25683550	30999539	A	T	2	1	0	1	0	0	1	0		0	0	1	0	0	0
Tf_Tl_S1_25683570_S1_30999559	1	172.3	25683570	30999559	A	G	1	0	0	0	0	0	1	0		0	0	0	0	0	0
Tf_Tl_S1_25683594_S1_30999583	1	172.3	25683594	30999583	T	C	0	1	0	0	0	0	0	0		1	0	0	0	0	0
Tf_Tl_S1_25703766_S1_31042461	1	172.7	25703766	31042461	T	C	0	1	0	0	0	0	0	0		1	0	0	0	0	0
Tf_Tl_S1_25703781_S1_31042476	1	172.7	25703781	31042476	T	G	0	1	0	0	0	0	0	0		1	0	0	0	0	0
Tf_Tl_S1_25723714_S1_31063591	1	172.7	25723714	31063591	C	T	3	3	0	0	0	1	1	1		1	1	0	1	0	0
Tf_Tl_S1_25728113_S1_31068861	1	172.7	25728113	31068861	T	C	0	1	0	0	0	0	0	0		1	0	0	0	0	0
Tf_S1_25738534	1	172.7	25738534	NA	C	A	1	0	0	0	0	0	1	0		0	0	0	0	0	0
Tf_Tl_S1_25743551_S1_31072217	1	172.8	25743551	31072217	G	A	0	1	0	0	0	0	0	0		1	0	0	0	0	0
Tf_S1_25764969	1	173	25764969	NA	G	-	1	0	0	0	0	0	1	0		0	0	0	0	0	0
Tl_S1_31099785	1	173	NA	31099785	G	-	1	0	0	0	0	0	1	0		0	0	0	0	0	0
Tf_Tl_S1_25779031_S1_31115769	1	173	25779031	31115769	G	C	1	1	0	0	1	0	0	0		0	1	0	0	0	0
Tf_Tl_S1_25779091_S1_31115829	1	173	25779091	31115829	C	T	1	1	0	0	1	0	0	0		0	1	0	0	0	0
Tf_Tl_S1_25820197_S1_31162534	1	173	25820197	31162534	G	C	0	1	0	0	0	0	0	0		1	0	0	0	0	0
Tf_S1_25835880	1	173	25835880	NA	A	G	1	0	0	0	1	0	0	0		0	0	0	0	0	0
Tf_Tl_S1_25845718_S1_31178358	1	173	25845718	31178358	T	A	1	0	0	0	0	0	1	0		0	0	0	0	0	0
Tf_Tl_S1_25845867_S1_31178507	1	173.5	25845867	31178507	C	G	2	0	0	0	1	0	1	0		0	0	0	0	0	0
Tf_Tl_S1_25855648_S1_31188699	1	174.4	25855648	31188699	T	A	0	1	0	0	0	0	0	0		0	0	0	1	0	0
Tf_Tl_S1_25857026_S1_31190103	1	174.4	25857026	31190103	A	G	0	1	0	0	0	0	0	0		0	0	0	0	0	1
Tf_Tl_S1_25857142_S1_31190219	1	174.4	25857142	31190219	G	A	0	1	0	0	0	0	0	0		0	0	0	0	0	1
Tf_Tl_S1_25857463_S1_31190543	1	174.4	25857463	31190543	T	C	0	1	0	0	0	0	0	0		0	0	0	1	0	0
Tf_Tl_S1_25857472_S1_31190552	1	174.4	25857472	31190552	G	A	0	1	0	0	0	0	0	0		0	0	0	1	0	0
Tf_Tl_S1_25858551_S1_31191624	1	174.4	25858551	31191624	A	T	0	1	0	0	0	0	0	0		0	0	0	0	0	1
Tf_Tl_S1_25866661_S1_31199802	1	174.4	25866661	31199802	T	-	3	1	1	0	1	0	1	0		0	0	0	0	1	0
Tf_Tl_S1_25866662_S1_31199803	1	174.4	25866662	31199803	C	-	3	1	1	0	1	0	1	0		0	0	0	0	1	0
Tf_Tl_S1_25866676_S1_31199817	1	174.4	25866676	31199817	T	C	3	1	1	0	1	0	1	0		0	0	0	0	1	0
Tf_Tl_S1_25869938_S1_31203072	1	175	25869938	31203072	A	C	2	0	0	0	0	1	0	1		0	0	0	0	0	0
Tl_S1_31203113	1	175	NA	31203113	A	G	2	0	0	0	0	1	0	1		0	0	0	0	0	0
Tl_S1_31216577	1	175	NA	31216577	G	C	2	0	0	0	0	1	0	1		0	0	0	0	0	0
Tl_S1_31220712	1	175	NA	31220712	C	A	3	1	1	0	0	1	0	1		0	0	0	0	1	0
Tl_S1_31220718	1	175	NA	31220718	C	G	3	2	1	0	0	1	0	1		0	0	1	0	1	0
Tf_S1_25869979	1	175	25869979	NA	A	G	2	0	0	0	0	1	0	1		0	0	0	0	0	0
Tf_S1_25879645	1	175	25879645	NA	G	A	1	1	1	0	0	0	0	0		0	0	0	0	1	0
Tf_S1_25879651	1	175	25879651	NA	G	C	0	1	0	0	0	0	0	0		0	0	0	1	0	0
Tf_S1_25883741	1	175	25883741	NA	G	C	2	0	0	0	0	1	0	1		0	0	0	0	0	0
Tl_S1_31220721	1	175.2	NA	31220721	C	T	0	1	0	0	0	0	0	0		0	0	1	0	0	0
Tf_S1_25886835	1	175.3	25886835	NA	C	T	0	1	0	0	0	0	0	0		0	0	1	0	0	0
Tf_Tl_S1_25894034_S1_31228523	1	175.3	25894034	31228523	G	C	0	1	0	0	0	0	0	0		0	0	0	1	0	0
Tf_Tl_S1_25899836_S1_31233956	1	175.3	25899836	31233956	A	G	0	1	0	0	0	0	0	0		0	0	1	0	0	0
Tl_S1_31243156	1	175.3	NA	31243156	C	A	2	0	0	0	0	1	0	1		0	0	0	0	0	0
Tf_S1_25908954	1	175.3	25908954	NA	C	A	2	0	0	0	0	1	0	1		0	0	0	0	0	0
Tf_S1_25908957	1	175.3	25908957	NA	C	T	2	0	0	0	0	1	0	1		0	0	0	0	0	0
Tl_S1_31243159	1	175.3	NA	31243159	C	T	2	0	0	0	0	1	0	1		0	0	0	0	0	0
Tf_Tl_S1_25919020_S1_31253119	1	175.3	25919020	31253119	G	T	2	2	1	0	1	0	0	0		0	0	1	0	1	0
Tf_Tl_S1_25928674_S1_31262980	1	175.3	25928674	31262980	C	G	1	1	0	1	0	0	0	0		0	0	0	1	0	0
Tf_S1_25967756	1	175.5	25967756	NA	A	G	1	1	1	0	0	0	0	0		0	0	0	0	1	0
Tf_S1_25967801	1	175.5	25967801	NA	A	G	1	1	1	0	0	0	0	0		0	0	0	0	1	0
Tf_Tl_S1_25973747_S1_31293620	1	175.5	25973747	31293620	G	C	0	1	0	0	0	0	0	0		0	0	1	0	0	0
Tf_Tl_S1_25973765_S1_31293638	1	175.5	25973765	31293638	A	T	0	1	0	0	0	0	0	0		0	0	0	1	0	0
Tl_S1_31294206	1	175.8	NA	31294206	C	A	2	0	0	0	0	1	0	1		0	0	0	0	0	0
Tf_S1_25974335	1	175.8	25974335	NA	C	A	2	0	0	0	0	1	0	1		0	0	0	0	0	0
Tf_S1_25974378	1	175.8	25974378	NA	A	G	2	0	0	0	0	1	0	1		0	0	0	0	0	0
Tf_Tl_S1_25984554_S1_31304330	1	176.1	25984554	31304330	C	G	0	1	0	0	0	0	0	0		0	1	0	0	0	0
Tf_Tl_S1_25989723_S1_31309586	1	176.1	25989723	31309586	G	A	0	1	0	0	0	0	0	0		0	0	0	0	0	1
Tf_Tl_S1_26012154_S1_31330259	1	176.1	26012154	31330259	A	G	1	0	0	0	1	0	0	0		0	0	0	0	0	0
Tf_Tl_S1_26012155_S1_31330260	1	176.1	26012155	31330260	A	-	1	0	0	0	1	0	0	0		0	0	0	0	0	0
Tf_S1_26013624	1	176.1	26013624	NA	C	T	1	0	0	0	1	0	0	0		0	0	0	0	0	0
Tf_Tl_S1_26017249_S1_31335771	1	176.1	26017249	31335771	C	T	2	0	0	0	0	1	0	1		0	0	0	0	0	0
Tf_Tl_S1_26021720_S1_31340203	1	176.2	26021720	31340203	C	T	1	1	0	0	1	0	0	0		0	0	1	0	0	0
Tf_Tl_S1_26021732_S1_31340215	1	176.2	26021732	31340215	A	G	0	1	0	0	0	0	0	0		0	0	0	1	0	0
Tf_Tl_S1_26023767_S1_31342097	1	176.2	26023767	31342097	A	C	0	1	0	0	0	0	0	0		0	0	0	1	0	0
Tf_Tl_S1_26023775_S1_31342105	1	176.2	26023775	31342105	T	A	2	1	0	0	0	1	0	1		0	1	0	0	0	0
Tf_Tl_S1_26031386_S1_31349127	1	176.2	26031386	31349127	T	C	2	0	0	0	0	1	0	1		0	0	0	0	0	0
Tf_Tl_S1_26045609_S1_31364437	1	176.3	26045609	31364437	-	A	0	1	0	0	0	0	0	0		0	0	1	0	0	0
Tl_S1_31366078	1	176.3	NA	31366078	T	A	3	0	0	0	1	1	0	1		0	0	0	0	0	0
Tf_S1_26047257	1	176.3	26047257	NA	T	A	3	0	0	0	1	1	0	1		0	0	0	0	0	0
Tf_Tl_S1_26047258_S1_31366079	1	176.3	26047258	31366079	T	A	1	0	0	0	1	0	0	0		0	0	0	0	0	0
Tf_Tl_S1_26047264_S1_31366085	1	176.3	26047264	31366085	T	-	1	0	0	0	1	0	0	0		0	0	0	0	0	0
Tf_Tl_S1_26050110_S1_31368954	1	176.3	26050110	31368954	C	A	0	1	0	0	0	0	0	0		0	0	1	0	0	0
Tl_S1_31444530	1	176.8	NA	31444530	C	-	0	1	0	0	0	0	0	0		1	0	0	0	0	0
Tl_S1_31444544	1	177.1	NA	31444544	T	A	0	1	0	0	0	0	0	0		0	0	0	1	0	0
Tl_S1_31444551	1	177.1	NA	31444551	C	T	0	1	0	0	0	0	0	0		0	0	0	0	0	1
Tl_S1_31444569	1	177.1	NA	31444569	G	A	2	3	1	0	1	0	0	0		0	1	0	1	1	0
Tl_S1_31444579	1	177.1	NA	31444579	G	T	2	3	1	0	1	0	0	0		0	1	0	1	1	0
Tf_S1_26086945	1	177.1	26086945	NA	A	-	2	2	0	0	0	1	0	1		0	0	1	0	0	1
Tf_S1_26086947	1	177.1	26086947	NA	A	C	0	1	0	0	0	0	0	0		0	1	0	0	0	0
Tf_S1_26086949	1	177.1	26086949	NA	A	C	2	2	0	0	0	1	0	1		0	0	1	0	0	1
Tf_S1_26086953	1	177.1	26086953	NA	A	C	2	2	0	1	0	0	1	0		1	0	0	1	0	0
Tf_S1_26086960	1	177.4	26086960	NA	A	-	0	1	0	0	0	0	0	0		0	0	1	0	0	0
Tf_S1_26087001	1	177.4	26087001	NA	A	T	0	1	0	0	0	0	0	0		0	1	0	0	0	0
Tf_S1_26103105	1	177.9	26103105	NA	C	A	0	1	0	0	0	0	0	0		1	0	0	0	0	0
Tf_S1_26103119	1	177.9	26103119	NA	T	A	0	1	0	0	0	0	0	0		0	0	0	1	0	0
Tf_Tl_S1_26104706_S1_31446106	1	177.9	26104706	31446106	C	T	0	1	0	0	0	0	0	0		0	0	1	0	0	0
Tf_Tl_S1_26104710_S1_31446110	1	177.9	26104710	31446110	G	A	0	1	0	0	0	0	0	0		1	0	0	0	0	0
Tf_S1_26104742	1	177.9	26104742	NA	T	C	2	2	0	1	0	0	1	0		0	0	1	0	0	1
Tl_S1_31446142	1	177.9	NA	31446142	T	C	2	2	0	1	0	0	1	0		0	0	1	0	0	1
Tf_Tl_S1_26105281_S1_31446689	1	178.3	26105281	31446689	C	G	0	1	0	0	0	0	0	0		0	0	0	0	0	1
Tf_Tl_S1_26105316_S1_31446724	1	178.3	26105316	31446724	T	C	0	1	0	0	0	0	0	0		0	0	0	0	0	1
Tl_S1_31477091	1	178.3	NA	31477091	T	G	2	2	1	0	1	0	0	0		0	0	0	0	1	1
Tf_S1_26136794	1	178.3	26136794	NA	T	G	2	2	1	0	1	0	0	0		0	0	0	0	1	1
Tf_Tl_S1_26136800_S1_31477097	1	178.3	26136800	31477097	G	A	0	1	0	0	0	0	0	0		0	0	0	1	0	0
Tl_S1_31477121	1	178.3	NA	31477121	G	A	3	2	0	1	1	0	1	0		1	0	0	1	0	0
Tf_Tl_S1_26144636_S1_31484935	1	178.6	26144636	31484935	T	C	1	0	0	1	0	0	0	0		0	0	0	0	0	0
Tf_Tl_S1_26149564_S1_31490391	1	178.6	26149564	31490391	A	G	0	1	0	0	0	0	0	0		0	0	0	1	0	0
Tf_Tl_S1_26149581_S1_31490408	1	178.6	26149581	31490408	A	G	3	2	0	1	0	1	0	1		0	1	0	1	0	0
Tl_S1_31563750	1	178.9	NA	31563750	T	C	1	1	0	1	0	0	0	0		0	0	0	0	0	1
Tf_S1_26249007	1	178.9	26249007	NA	T	C	1	1	0	1	0	0	0	0		0	0	0	0	0	1
Tf_S1_26249010	1	179.4	26249010	NA	G	A	1	0	0	1	0	0	0	0		0	0	0	0	0	0
Tf_S1_26255851	1	179.4	26255851	NA	G	A	2	2	0	1	1	0	0	0		0	0	1	1	0	0
Tl_S1_31563753	1	179.4	NA	31563753	G	A	1	0	0	1	0	0	0	0		0	0	0	0	0	0
Tf_S1_26270841	1	179.7	26270841	NA	T	C	1	1	0	1	0	0	0	0		0	1	0	0	0	0
Tl_S1_31588154	1	179.7	NA	31588154	-	T	1	1	1	0	0	0	0	0		0	0	0	0	1	0
Tf_S1_26270847	1	179.7	26270847	NA	A	-	1	1	1	0	0	0	0	0		0	0	0	0	1	0
Tl_S1_31588195	1	179.7	NA	31588195	T	C	1	1	0	1	0	0	0	0		0	1	0	0	0	0
Tf_Tl_S1_26281628_S1_31599348	1	179.9	26281628	31599348	A	T	0	2	0	0	0	0	0	0		0	0	1	1	0	0
Tf_Tl_S1_26319948_S1_31643766	1	179.9	26319948	31643766	C	A	0	1	0	0	0	0	0	0		0	0	0	1	0	0
Tf_Tl_S1_26319982_S1_31643800	1	179.9	26319982	31643800	T	C	1	1	0	0	1	0	0	0		0	0	0	1	0	0
Tf_Tl_S1_26332982_S1_31658983	1	179.9	26332982	31658983	T	A	1	0	0	0	1	0	0	0		0	0	0	0	0	0
Tf_Tl_S1_26334481_S1_31660481	1	180.3	26334481	31660481	C	T	1	1	0	1	0	0	0	0		0	0	0	0	0	1
Tf_Tl_S1_26347984_S1_31726731	1	180.3	26347984	31726731	-	G	0	1	0	0	0	0	0	0		1	0	0	0	0	0
Tf_S1_26348031	1	180.3	26348031	NA	G	A	1	0	0	1	0	0	0	0		0	0	0	0	0	0
Tf_S1_26348033	1	180.3	26348033	NA	G	T	0	2	0	0	0	0	0	0		0	0	0	1	0	1
Tf_S1_26354593	1	180.3	26354593	NA	C	-	1	1	0	0	1	0	0	0		1	0	0	0	0	0
Tf_S1_26354594	1	180.3	26354594	NA	-	C	1	1	0	0	1	0	0	0		1	0	0	0	0	0
Tf_Tl_S1_26354627_S1_31684964	1	180.3	26354627	31684964	C	T	1	1	0	0	1	0	0	0		1	0	0	0	0	0
Tl_S1_31696728	1	180.3	NA	31696728	A	C	0	1	0	0	0	0	0	0		1	0	0	0	0	0
Tl_S1_31696735	1	181.3	NA	31696735	T	G	1	1	0	0	1	0	0	0		0	0	1	0	0	0
Tl_S1_31696743	1	181.3	NA	31696743	A	T	2	1	1	0	0	0	1	0		0	0	0	0	1	0
Tl_S1_31706606	1	181.3	NA	31706606	C	T	1	4	0	1	0	0	0	0		1	0	1	1	0	1
Tf_S1_26373525	1	181.3	26373525	NA	C	T	1	4	0	1	0	0	0	0		1	0	1	1	0	1
Tf_S1_26373529	1	181.6	26373529	NA	C	T	3	1	0	0	1	1	0	1		0	1	0	0	0	0
Tl_S1_31706610	1	181.6	NA	31706610	C	T	3	1	0	0	1	1	0	1		0	1	0	0	0	0
Tf_Tl_S1_26373566_S1_31706647	1	181.6	26373566	31706647	T	-	0	1	0	0	0	0	0	0		0	0	1	0	0	0
Tf_S1_26378239	1	181.6	26378239	NA	T	A	3	0	0	0	1	1	0	1		0	0	0	0	0	0
Tl_S1_31711956	1	181.6	NA	31711956	T	A	3	0	0	0	1	1	0	1		0	0	0	0	0	0
Tf_S1_26383857	1	182.1	26383857	NA	A	G	1	0	0	0	1	0	0	0		0	0	0	0	0	0
Tl_S1_31717718	1	182.1	NA	31717718	A	G	1	0	0	0	1	0	0	0		0	0	0	0	0	0
Tl_S1_31719368	1	182.3	NA	31719368	-	T	2	1	1	0	0	0	1	0		0	0	0	0	1	0
Tf_Tl_S1_26392447_S1_31726716	1	182.3	26392447	31726716	A	G	2	1	1	0	0	0	1	0		0	0	0	0	1	0
Tf_Tl_S1_26431233_S1_31749608	1	182.3	26431233	31749608	G	C	1	0	0	0	1	0	0	0		0	0	0	0	0	0
Tf_Tl_S1_26469433_S1_31785692	1	182.3	26469433	31785692	T	A	0	1	0	0	0	0	0	0		0	0	0	1	0	0
Tf_Tl_S1_26469448_S1_31785707	1	182.4	26469448	31785707	T	C	0	1	0	0	0	0	0	0		0	1	0	0	0	0
Tf_Tl_S1_26473978_S1_31790237	1	182.5	26473978	31790237	-	G	0	1	0	0	0	0	0	0		0	0	0	1	0	0
Tf_S1_26487035	1	183.6	26487035	NA	C	G	0	2	0	0	0	0	0	0		0	0	0	1	0	1
Tf_S1_26487047	1	183.6	26487047	NA	G	A	0	2	0	0	0	0	0	0		0	0	0	1	0	1
Tl_S1_31805451	1	183.6	NA	31805451	C	G	0	2	0	0	0	0	0	0		0	0	0	1	0	1
Tl_S1_31805463	1	183.6	NA	31805463	G	A	0	2	0	0	0	0	0	0		0	0	0	1	0	1
Tl_S1_31805498	1	183.6	NA	31805498	G	T	0	2	0	0	0	0	0	0		0	0	0	1	0	1
Tf_S1_26487082	1	183.6	26487082	NA	G	T	0	2	0	0	0	0	0	0		0	0	0	1	0	1
Tf_Tl_S1_26490273_S1_31808721	1	184.5	26490273	31808721	A	C	0	2	0	0	0	0	0	0		0	0	0	1	0	1
Tf_Tl_S1_26510793_S1_31831944	1	184.5	26510793	31831944	A	G	2	1	1	0	0	0	1	0		0	0	0	0	1	0
Tf_S1_26510833	1	184.5	26510833	NA	C	-	1	0	0	0	1	0	0	0		0	0	0	0	0	0
Tf_S1_26510834	1	186.2	26510834	NA	A	C	1	2	0	1	0	0	0	0		1	0	0	0	0	1
Tf_S1_26510839	1	186.2	26510839	NA	A	-	2	2	1	0	0	0	1	0		0	0	0	1	1	0
Tf_S1_26510840	1	186.2	26510840	NA	A	-	2	1	1	0	0	0	1	0		0	0	0	0	1	0
Tf_S1_26510848	1	186.2	26510848	NA	A	C	2	2	1	0	0	0	1	0		0	0	0	1	1	0
Tf_S1_26510849	1	186.8	26510849	NA	C	-	2	2	0	0	0	1	0	1		0	1	1	0	0	0
Tf_S1_26510850	1	186.8	26510850	NA	C	-	2	2	0	0	0	1	0	1		0	1	1	0	0	0
Tf_S1_26510851	1	186.8	26510851	NA	T	A	2	2	0	0	0	1	0	1		0	1	1	0	0	0
Tf_S1_26510854	1	186.8	26510854	NA	T	A	2	2	0	0	0	1	0	1		0	1	1	0	0	0
Tf_S1_26510855	1	186.8	26510855	NA	T	A	2	2	0	0	0	1	0	1		0	1	1	0	0	0
Tf_S1_26510857	1	187	26510857	NA	A	-	1	2	0	1	0	0	0	0		1	0	0	0	0	1
Tf_S1_26510858	1	187	26510858	NA	A	-	1	3	0	1	0	0	0	0		1	0	0	1	0	1
Tf_S1_26510859	1	187.1	26510859	NA	-	T	3	1	1	0	1	0	1	0		0	0	0	0	1	0
Tf_S1_26512707	1	189.4	26512707	NA	-	G	0	1	0	0	0	0	0	0		0	0	0	1	0	0
Tl_S1_31833851	1	189.4	NA	31833851	-	G	0	1	0	0	0	0	0	0		0	0	0	1	0	0
Tf_Tl_S1_26515694_S1_31836857	1	190.1	26515694	31836857	A	G	3	2	1	0	1	0	1	0		0	0	0	1	1	0
Tf_S1_26515697	1	190.1	26515697	NA	A	G	1	3	0	1	0	0	0	0		1	1	0	0	0	1
Tf_Tl_S1_26515703_S1_31836860	1	190.1	26515703	31836860	T	C	1	3	0	1	0	0	0	0		1	1	0	0	0	1
Tf_Tl_S1_26521571_S1_31840008	1	190.1	26521571	31840008	A	G	1	0	0	0	1	0	0	0		0	0	0	0	0	0
Tf_Tl_S1_26522130_S1_31840569	1	190.1	26522130	31840569	C	A	0	1	0	0	0	0	0	0		0	0	0	1	0	0
Tf_Tl_S1_26522160_S1_31840599	1	190.6	26522160	31840599	A	T	1	0	0	1	0	0	0	0		0	0	0	0	0	0
Tf_Tl_S1_26526080_S1_31845633	1	190.6	26526080	31845633	A	C	0	1	0	0	0	0	0	0		1	0	0	0	0	0
Tf_Tl_S1_26529980_S1_31850096	1	190.6	26529980	31850096	G	T	0	1	0	0	0	0	0	0		0	0	0	0	0	1
Tf_Tl_S1_26534145_S1_31854580	1	190.6	26534145	31854580	A	G	3	2	0	0	1	1	0	1		0	1	1	0	0	0
Tf_Tl_S1_26534149_S1_31854584	1	190.6	26534149	31854584	G	T	0	1	0	0	0	0	0	0		0	1	0	0	0	0
Tf_Tl_S1_26534151_S1_31854586	1	190.6	26534151	31854586	G	T	1	1	0	1	0	0	0	0		0	0	0	0	0	1
Tf_Tl_S1_26534152_S1_31854587	1	190.7	26534152	31854587	T	A	1	0	0	0	1	0	0	0		0	0	0	0	0	0
Tf_Tl_S1_26541665_S1_31863675	1	190.7	26541665	31863675	C	T	2	1	0	0	0	1	0	1		0	0	1	0	0	0
Tf_Tl_S1_26582785_S1_31902839	1	190.7	26582785	31902839	A	G	2	2	0	0	0	1	0	1		0	1	1	0	0	0
Tl_S1_31923850	1	191.1	NA	31923850	C	T	2	1	1	0	0	0	1	0		0	0	0	0	1	0
Tf_S1_26598751	1	191.1	26598751	NA	C	T	2	1	1	0	0	0	1	0		0	0	0	0	1	0
Tf_Tl_S1_26598757_S1_31923856	1	191.1	26598757	31923856	A	G	2	1	1	0	0	0	1	0		0	0	0	0	1	0
Tl_S1_31930841	1	191.1	NA	31930841	C	A	1	0	0	0	1	0	0	0		0	0	0	0	0	0
Tf_Tl_S1_26611286_S1_31938593	1	191.1	26611286	31938593	C	A	1	0	0	0	1	0	0	0		0	0	0	0	0	0
Tf_Tl_S1_26611302_S1_31938609	1	191.1	26611302	31938609	C	T	0	1	0	0	0	0	0	0		1	0	0	0	0	0
Tf_Tl_S1_26625120_S1_31953770	1	191.1	26625120	31953770	G	A	1	0	0	0	1	0	0	0		0	0	0	0	0	0
Tf_Tl_S1_26629385_S1_31958618	1	191.2	26629385	31958618	T	C	2	1	1	0	0	0	1	0		0	0	0	0	1	0
Tl_S1_31978748	1	191.8	NA	31978748	G	-	0	1	0	0	0	0	0	0		0	0	0	1	0	0
Tl_S1_31978749	1	191.8	NA	31978749	-	G	0	1	0	0	0	0	0	0		0	0	0	1	0	0
Tl_S1_31978767	1	191.8	NA	31978767	G	T	0	1	0	0	0	0	0	0		0	0	0	1	0	0
Tf_S1_26642956	1	191.8	26642956	NA	G	T	0	1	0	0	0	0	0	0		0	0	0	1	0	0
Tf_Tl_S1_26643026_S1_31978837	1	191.8	26643026	31978837	C	G	1	1	0	1	0	0	0	0		0	0	0	0	0	1
Tf_Tl_S1_26659977_S1_31996494	1	192.2	26659977	31996494	A	T	0	1	0	0	0	0	0	0		0	0	0	1	0	0
Tf_S1_26662453	1	192.2	26662453	NA	T	A	1	0	0	1	0	0	0	0		0	0	0	0	0	0
Tf_S1_26662464	1	192.2	26662464	NA	C	A	1	0	0	1	0	0	0	0		0	0	0	0	0	0
Tf_S1_26662479	1	192.2	26662479	NA	C	A	0	1	0	0	0	0	0	0		0	0	0	0	0	1
Tf_Tl_S1_26668414_S1_32008914	1	192.2	26668414	32008914	C	G	1	0	0	1	0	0	0	0		0	0	0	0	0	0
Tf_Tl_S1_26669998_S1_32010498	1	192.2	26669998	32010498	G	A	0	1	0	0	0	0	0	0		0	0	0	1	0	0
Tf_S1_26673928	1	192.2	26673928	NA	G	A	0	1	0	0	0	0	0	0		0	1	0	0	0	0
Tf_S1_26673944	1	192.2	26673944	NA	G	C	0	1	0	0	0	0	0	0		0	0	0	1	0	0
Tf_S1_26674017	1	192.4	26674017	NA	G	A	2	1	0	0	0	1	0	1		0	0	1	0	0	0
Tf_Tl_S1_26675675_S1_32016132	1	192.4	26675675	32016132	G	C	1	1	0	1	0	0	0	0		0	0	0	1	0	0
Tf_Tl_S1_26721025_S1_32063995	1	192.7	26721025	32063995	G	A	0	2	0	0	0	0	0	0		1	0	1	0	0	0
Tf_Tl_S1_26726591_S1_32070438	1	193.1	26726591	32070438	G	A	1	4	0	1	0	0	0	0		1	0	1	1	0	1
Tf_Tl_S1_26726627_S1_32070474	1	193.4	26726627	32070474	A	G	1	1	1	0	0	0	0	0		0	0	0	0	1	0
Tf_Tl_S1_26737653_S1_32082934	1	193.4	26737653	32082934	A	G	4	1	1	0	1	1	0	1		0	0	0	0	1	0
Tf_Tl_S1_26740247_S1_32085506	1	193.4	26740247	32085506	C	A	1	1	1	0	0	0	0	0		0	0	0	0	1	0
Tf_Tl_S1_26740278_S1_32085537	1	193.5	26740278	32085537	C	T	2	0	0	0	0	1	0	1		0	0	0	0	0	0
Tf_S1_26750510	1	193.7	26750510	NA	C	A	1	1	1	0	0	0	0	0		0	0	0	0	1	0
Tf_S1_26750555	1	193.7	26750555	NA	G	C	0	1	0	0	0	0	0	0		1	0	0	0	0	0
Tl_S1_32096412	1	194	NA	32096412	T	A	1	0	0	0	1	0	0	0		0	0	0	0	0	0
Tf_S1_26751450	1	194	26751450	NA	T	A	1	0	0	0	1	0	0	0		0	0	0	0	0	0
Tf_S1_26751458	1	194	26751458	NA	C	T	1	1	1	0	0	0	0	0		0	0	0	0	1	0
Tl_S1_32096420	1	194.1	NA	32096420	C	T	1	1	1	0	0	0	0	0		0	0	0	0	1	0
Tl_S1_32096443	1	194.1	NA	32096443	A	C	1	0	0	0	1	0	0	0		0	0	0	0	0	0
Tf_S1_26751481	1	194.1	26751481	NA	A	C	1	0	0	0	1	0	0	0		0	0	0	0	0	0
Tf_S1_26763338	1	194.5	26763338	NA	A	G	1	1	0	1	0	0	0	0		0	0	1	0	0	0
Tf_Tl_S1_26765792_S1_32146547	1	194.6	26765792	32146547	C	-	1	0	0	0	1	0	0	0		0	0	0	0	0	0
Tf_Tl_S1_26779894_S1_32156060	1	194.7	26779894	32156060	A	-	1	1	0	1	0	0	0	0		0	0	1	0	0	0
Tf_Tl_S1_26779905_S1_32156071	1	194.7	26779905	32156071	C	A	1	1	0	1	0	0	0	0		0	0	1	0	0	0
Tf_Tl_S1_26779917_S1_32156083	1	194.9	26779917	32156083	C	A	0	2	0	0	0	0	0	0		0	0	0	1	0	1
Tf_S1_26802842	1	194.9	26802842	NA	A	G	0	1	0	0	0	0	0	0		1	0	0	0	0	0
Tl_S1_32162605	1	194.9	NA	32162605	C	T	5	1	0	1	1	1	1	1		0	0	1	0	0	0
Tf_Tl_S1_26804489_S1_32184921	1	194.9	26804489	32184921	T	A	2	0	0	0	0	1	0	1		0	0	0	0	0	0
Tf_Tl_S1_26804508_S1_32184940	1	194.9	26804508	32184940	C	T	0	2	0	0	0	0	0	0		0	0	0	1	0	1
Tf_S1_26806924	1	195.4	26806924	NA	C	T	3	2	0	0	0	1	1	1		1	1	0	0	0	0
Tf_S1_26806940	1	195.4	26806940	NA	T	A	0	2	0	0	0	0	0	0		0	0	0	1	0	1
Tf_S1_26806948	1	195.4	26806948	NA	C	T	1	3	0	0	0	0	1	0		0	1	0	1	0	1
Tf_S1_26806964	1	195.4	26806964	NA	C	A	1	1	0	0	0	0	1	0		0	1	0	0	0	0
Tf_S1_26806977	1	195.4	26806977	NA	C	-	3	2	0	0	0	1	1	1		1	1	0	0	0	0
Tf_S1_26806978	1	195.4	26806978	NA	-	C	3	2	0	0	0	1	1	1		1	1	0	0	0	0
Tf_S1_26810343	1	195.9	26810343	NA	T	-	0	1	0	0	0	0	0	0		0	1	0	0	0	0
Tl_S1_32204720	1	195.9	NA	32204720	T	G	0	1	0	0	0	0	0	0		0	0	1	0	0	0
Tf_S1_26824573	1	195.9	26824573	NA	T	G	0	1	0	0	0	0	0	0		0	0	1	0	0	0
Tl_S1_32204757	1	195.9	NA	32204757	G	A	3	0	0	0	1	1	0	1		0	0	0	0	0	0
Tf_S1_26824610	1	195.9	26824610	NA	G	A	3	0	0	0	1	1	0	1		0	0	0	0	0	0
Tf_Tl_S1_26830777_S1_32212646	1	195.9	26830777	32212646	C	G	0	2	0	0	0	0	0	0		0	0	0	1	0	1
Tf_Tl_S1_26849478_S1_32231756	1	196.2	26849478	32231756	A	T	0	1	0	0	0	0	0	0		0	0	0	1	0	0
Tf_Tl_S1_26851743_S1_32233994	1	196.2	26851743	32233994	C	T	0	1	0	0	0	0	0	0		0	1	0	0	0	0
Tf_Tl_S1_26860461_S1_32238777	1	196.2	26860461	32238777	T	C	1	0	0	0	1	0	0	0		0	0	0	0	0	0
Tf_S1_26873124	1	197	26873124	NA	-	G	2	2	1	0	1	0	0	0		0	0	0	0	1	1
Tf_Tl_S1_26873130_S1_32252360	1	197	26873130	32252360	C	T	0	1	0	0	0	0	0	0		0	0	1	0	0	0
Tl_S1_32252396	1	197.1	NA	32252396	C	T	0	2	0	0	0	0	0	0		0	1	0	1	0	0
Tf_S1_26873166	1	197.1	26873166	NA	C	T	0	2	0	0	0	0	0	0		0	1	0	1	0	0
Tf_S1_26873171	1	197.1	26873171	NA	A	G	2	2	1	0	1	0	0	0		0	0	0	0	1	1
Tl_S1_32252401	1	197.1	NA	32252401	A	G	2	2	1	0	1	0	0	0		0	0	0	0	1	1
Tf_S1_26873182	1	197.6	26873182	NA	C	T	1	3	0	1	0	0	0	0		1	1	0	1	0	0
Tf_Tl_S1_26884800_S1_32262918	1	198.1	26884800	32262918	C	T	0	1	0	0	0	0	0	0		1	0	0	0	0	0
Tf_Tl_S1_26884824_S1_32262942	1	198.1	26884824	32262942	C	T	0	2	0	0	0	0	0	0		1	0	0	1	0	0
Tl_S1_32263460	1	198.1	NA	32263460	C	T	1	0	0	1	0	0	0	0		0	0	0	0	0	0
Tf_S1_26885338	1	198.1	26885338	NA	C	T	1	0	0	1	0	0	0	0		0	0	0	0	0	0
Tf_Tl_S1_26896538_S1_32274451	1	198.1	26896538	32274451	-	G	0	1	0	0	0	0	0	0		1	0	0	0	0	0
Tf_S1_26896539	1	198.1	26896539	NA	A	T	0	1	0	0	0	0	0	0		1	0	0	0	0	0
Tl_S1_32274449	1	198.1	NA	32274449	-	A	0	1	0	0	0	0	0	0		0	1	0	0	0	0
Tf_Tl_S1_26896540_S1_32274450	1	198.1	26896540	32274450	T	-	0	1	0	0	0	0	0	0		0	1	0	0	0	0
Tf_S1_26911874	1	198.1	26911874	NA	G	A	1	0	0	1	0	0	0	0		0	0	0	0	0	0
Tl_S1_32297632	1	198.1	NA	32297632	A	T	1	0	1	0	0	0	0	0		0	0	0	0	0	0
Tf_S1_26914810	1	198.1	26914810	NA	A	T	1	0	1	0	0	0	0	0		0	0	0	0	0	0
Tl_S1_32315223	1	198.5	NA	32315223	A	T	1	0	0	0	1	0	0	0		0	0	0	0	0	0
Tl_S1_32315241	1	198.5	NA	32315241	G	A	1	0	0	0	1	0	0	0		0	0	0	0	0	0
Tf_S1_26929943	1	198.5	26929943	NA	A	T	1	0	0	0	1	0	0	0		0	0	0	0	0	0
Tl_S1_32365126	1	199	NA	32365126	A	C	4	2	0	0	1	1	1	1		0	1	1	0	0	0
Tf_S1_26963964	1	199	26963964	NA	A	C	4	2	0	0	1	1	1	1		0	1	1	0	0	0
Tf_S1_26963967	1	199.1	26963967	NA	G	T	1	3	1	0	0	0	0	0		1	0	0	0	1	1
Tl_S1_32365129	1	199.1	NA	32365129	G	T	1	3	1	0	0	0	0	0		1	0	0	0	1	1
Tf_Tl_S1_26963973_S1_32365135	1	199.1	26963973	32365135	T	C	0	1	0	0	0	0	0	0		1	0	0	0	0	0
Tf_Tl_S1_26963979_S1_32365141	1	199.1	26963979	32365141	G	A	0	1	0	0	0	0	0	0		1	0	0	0	0	0
Tf_S1_26964015	1	199.6	26964015	NA	C	T	0	1	0	0	0	0	0	0		0	0	0	1	0	0
Tf_S1_26966939	1	199.6	26966939	NA	T	-	1	1	0	0	1	0	0	0		0	1	0	0	0	0
Tl_S1_32365177	1	199.6	NA	32365177	C	T	0	1	0	0	0	0	0	0		0	0	0	1	0	0
Tl_S1_32368121	1	199.6	NA	32368121	T	-	1	1	0	0	1	0	0	0		0	1	0	0	0	0
Tf_Tl_S1_26982229_S1_32379757	1	200	26982229	32379757	G	T	0	1	0	0	0	0	0	0		0	1	0	0	0	0
Tf_Tl_S1_26995134_S1_32397417	1	200	26995134	32397417	T	C	0	1	0	0	0	0	0	0		0	0	0	1	0	0
Tf_Tl_S1_26995135_S1_32397418	1	200	26995135	32397418	T	C	3	0	0	0	0	1	1	1		0	0	0	0	0	0
Tf_Tl_S1_27005767_S1_32408104	1	200.1	27005767	32408104	T	G	1	0	0	1	0	0	0	0		0	0	0	0	0	0
Tf_Tl_S1_27026405_S1_32427077	1	200.1	27026405	32427077	C	T	0	1	0	0	0	0	0	0		0	0	1	0	0	0
Tf_Tl_S1_27026432_S1_32427104	1	200.1	27026432	32427104	G	T	0	1	0	0	0	0	0	0		0	0	0	1	0	0
Tf_Tl_S1_27026445_S1_32427117	1	200.1	27026445	32427117	A	T	1	0	0	0	0	0	1	0		0	0	0	0	0	0
Tl_S1_32470244	1	200.8	NA	32470244	G	A	1	3	0	1	0	0	0	0		0	0	1	1	0	1
Tf_S1_27042210	1	200.8	27042210	NA	T	C	1	1	0	0	0	0	1	0		1	0	0	0	0	0
Tf_S1_27063530	1	200.8	27063530	NA	G	A	1	3	0	1	0	0	0	0		0	0	1	1	0	1
Tf_S1_27063535	1	200.8	27063535	NA	G	C	1	3	0	1	0	0	0	0		0	0	1	1	0	1
Tl_S1_32470249	1	200.8	NA	32470249	G	C	1	3	0	1	0	0	0	0		0	0	1	1	0	1
Tf_S1_27063536	1	200.8	27063536	NA	A	T	3	0	0	0	0	1	1	1		0	0	0	0	0	0
Tl_S1_32470250	1	200.8	NA	32470250	A	T	3	0	0	0	0	1	1	1		0	0	0	0	0	0
Tf_S1_27087651	1	201.1	27087651	NA	T	C	1	1	1	0	0	0	0	0		0	0	0	0	1	0
Tf_S1_27087660	1	201.1	27087660	NA	G	T	1	0	0	1	0	0	0	0		0	0	0	0	0	0
Tf_S1_27087669	1	201.1	27087669	NA	T	A	0	1	0	0	0	0	0	0		1	0	0	0	0	0
Tf_Tl_S1_27092298_S1_32510355	1	201.1	27092298	32510355	-	T	0	2	0	0	0	0	0	0		1	1	0	0	0	0
Tf_S1_27092349	1	201.1	27092349	NA	C	-	0	2	0	0	0	0	0	0		1	1	0	0	0	0
Tf_Tl_S1_27092801_S1_32510866	1	201.6	27092801	32510866	G	A	1	2	0	1	0	0	0	0		0	0	0	1	0	1
Tf_Tl_S1_27092803_S1_32510868	1	201.6	27092803	32510868	C	G	2	0	0	0	0	1	0	1		0	0	0	0	0	0
Tf_Tl_S1_27092819_S1_32510884	1	201.6	27092819	32510884	C	T	1	2	0	1	0	0	0	0		0	0	0	1	0	1
Tf_Tl_S1_27092820_S1_32510885	1	201.8	27092820	32510885	G	A	0	1	0	0	0	0	0	0		1	0	0	0	0	0
Tf_Tl_S1_27152184_S1_32578455	1	202.4	27152184	32578455	C	T	0	1	0	0	0	0	0	0		0	1	0	0	0	0
Tf_Tl_S1_27170326_S1_32603343	1	202.4	27170326	32603343	T	A	1	2	1	0	0	0	0	0		0	0	0	1	1	0
Tf_Tl_S1_27170334_S1_32603351	1	202.5	27170334	32603351	A	C	0	1	0	0	0	0	0	0		0	1	0	0	0	0
Tf_Tl_S1_27177287_S1_32613261	1	202.6	27177287	32613261	A	G	0	3	0	0	0	0	0	0		1	1	1	0	0	0
Tf_Tl_S1_27177293_S1_32613267	1	202.6	27177293	32613267	-	A	0	3	0	0	0	0	0	0		1	1	1	0	0	0
Tf_Tl_S1_27177295_S1_32613269	1	202.6	27177295	32613269	A	-	0	3	0	0	0	0	0	0		1	1	1	0	0	0
Tf_Tl_S1_27177363_S1_32613337	1	202.7	27177363	32613337	A	-	0	3	0	0	0	0	0	0		1	1	1	0	0	0
Tl_S1_32633686	1	202.9	NA	32633686	T	C	0	2	0	0	0	0	0	0		0	0	0	1	0	1
Tf_S1_27197812	1	202.9	27197812	NA	T	C	2	2	0	1	1	0	0	0		0	0	0	1	0	1
Tl_S1_32633700	1	203.2	NA	32633700	T	C	0	1	0	0	0	0	0	0		0	0	0	1	0	0
Tf_S1_27197826	1	203.2	27197826	NA	T	C	0	1	0	0	0	0	0	0		0	0	0	1	0	0
Tf_S1_27197831	1	203.2	27197831	NA	C	T	2	0	0	1	1	0	0	0		0	0	0	0	0	0
Tl_S1_32633714	1	203.2	NA	32633714	A	G	0	1	0	0	0	0	0	0		0	0	0	1	0	0
Tf_S1_27197840	1	203.2	27197840	NA	A	G	0	1	0	0	0	0	0	0		0	0	0	1	0	0
Tl_S1_32677093	1	203.3	NA	32677093	-	T	0	1	0	0	0	0	0	0		0	0	0	0	0	1
Tl_S1_32677119	1	203.3	NA	32677119	T	-	0	1	0	0	0	0	0	0		0	0	0	0	0	1
Tf_Tl_S1_27224332_S1_32681130	1	203.7	27224332	32681130	C	T	1	2	1	0	0	0	0	0		1	0	0	0	1	0
Tf_Tl_S1_27224362_S1_32681160	1	203.7	27224362	32681160	T	C	1	2	1	0	0	0	0	0		1	0	0	0	1	0
Tf_Tl_S1_27224404_S1_32681200	1	203.8	27224404	32681200	C	T	0	1	0	0	0	0	0	0		0	0	1	0	0	0
Tf_Tl_S1_27225157_S1_32681955	1	203.8	27225157	32681955	C	T	0	1	0	0	0	0	0	0		0	0	0	0	0	1
Tf_Tl_S1_27225164_S1_32681962	1	203.8	27225164	32681962	A	G	3	3	0	0	0	1	1	1		0	1	1	0	0	1
Tf_Tl_S1_27225165_S1_32681963	1	203.8	27225165	32681963	A	C	3	3	0	0	0	1	1	1		0	1	1	0	0	1
Tl_S1_32699950	1	204	NA	32699950	C	T	0	1	0	0	0	0	0	0		0	0	0	0	0	1
Tf_Tl_S1_27242004_S1_32701353	1	204	27242004	32701353	C	T	1	1	1	0	0	0	0	0		0	0	0	0	1	0
Tl_S1_32707095	1	204.4	NA	32707095	T	C	0	2	0	0	0	0	0	0		1	1	0	0	0	0
Tf_S1_27247207	1	204.7	27247207	NA	T	C	0	1	0	0	0	0	0	0		0	1	0	0	0	0
Tl_S1_32707104	1	204.7	NA	32707104	G	A	0	1	0	0	0	0	0	0		0	1	0	0	0	0
Tl_S1_32707146	1	204.7	NA	32707146	C	T	0	1	0	0	0	0	0	0		1	0	0	0	0	0
Tf_Tl_S1_27267592_S1_32728556	1	204.7	27267592	32728556	-	C	0	1	0	0	0	0	0	0		0	0	1	0	0	0
Tf_S1_27267607	1	204.7	27267607	NA	C	T	2	1	0	1	1	0	0	0		0	0	0	0	0	1
Tl_S1_32728572	1	204.7	NA	32728572	C	T	2	1	0	1	1	0	0	0		0	0	0	0	0	1
Tf_Tl_S1_27267646_S1_32728611	1	204.7	27267646	32728611	G	A	0	1	0	0	0	0	0	0		0	0	0	0	0	1
Tf_Tl_S1_27270530_S1_32732275	1	204.7	27270530	32732275	C	T	0	1	0	0	0	0	0	0		0	1	0	0	0	0
Tl_S1_32736041	1	204.8	NA	32736041	G	T	0	1	0	0	0	0	0	0		0	0	1	0	0	0
Tf_Tl_S1_27278433_S1_32748079	1	204.9	27278433	32748079	T	C	2	0	0	1	1	0	0	0		0	0	0	0	0	0
Tf_Tl_S1_27278438_S1_32748084	1	205	27278438	32748084	C	A	1	4	1	0	0	0	0	0		0	0	1	1	1	1
Tf_S1_27296886	1	205	27296886	NA	T	C	2	2	0	1	1	0	0	0		0	1	0	0	0	1
Tf_Tl_S1_27312115_S1_32779720	1	205	27312115	32779720	G	-	1	3	1	0	0	0	0	0		1	0	1	0	1	0
Tf_Tl_S1_27312128_S1_32779733	1	205	27312128	32779733	T	C	0	1	0	0	0	0	0	0		0	0	1	0	0	0
Tf_S1_27312210	1	205.9	27312210	NA	T	G	1	1	1	0	0	0	0	0		0	0	0	0	1	0
Tf_Tl_S1_27322401_S1_32791030	1	205.9	27322401	32791030	C	A	5	1	1	1	0	1	1	1		0	0	0	0	1	0
Tf_Tl_S1_27322437_S1_32791066	1	205.9	27322437	32791066	G	T	1	1	0	0	1	0	0	0		0	0	0	1	0	0
Tf_Tl_S1_27341351_S1_32804566	1	206	27341351	32804566	T	C	0	1	0	0	0	0	0	0		0	0	0	1	0	0
Tf_Tl_S1_27341354_S1_32804569	1	206	27341354	32804569	G	T	2	0	0	1	0	0	1	0		0	0	0	0	0	0
Tf_Tl_S1_27342432_S1_32904493	1	206.1	27342432	32904493	C	T	0	1	0	0	0	0	0	0		1	0	0	0	0	0
Tf_S1_27344079	1	206.1	27344079	NA	G	C	0	1	0	0	0	0	0	0		1	0	0	0	0	0
Tf_Tl_S1_27352547_S1_32908130	1	206.1	27352547	32908130	T	G	0	1	0	0	0	0	0	0		1	0	0	0	0	0
Tf_Tl_S1_27355103_S1_32818243	1	206.1	27355103	32818243	C	T	1	0	0	0	0	0	1	0		0	0	0	0	0	0
Tf_Tl_S1_27360565_S1_32828127	1	206.1	27360565	32828127	G	A	1	0	0	0	0	0	1	0		0	0	0	0	0	0
Tf_Tl_S1_27362384_S1_32829953	1	206.1	27362384	32829953	G	A	0	1	0	0	0	0	0	0		0	0	0	1	0	0
[truncated: 28,669 more rows]
