# Supplementary material
Source: publisher figshare collection journal article supplement (https://gsajournals.figshare.com/articles/dataset/_/12246134)
Supplement: Supplementary file 2 [file 1]

# Multiple QTL mapping in autopolyploids: a random-effect model approach with application in a hexaploid sweetpotato full-sib population

Guilherme da Silva Pereira<sup>\*,†,1,2</sup>, Dorcus C. Gemenet<sup>§,1</sup>, Marcelo Mollinari<sup>\*,†</sup>, Bode A. Olukolu<sup>‡</sup>, Joshua C. Wood<sup>\*\*</sup>, Federico Diaz<sup>††</sup>, Veronica Mosquera<sup>††</sup>, Wolfgang J. Gruneberg<sup>††</sup>, Awais Khan<sup>§§</sup>, C. Robin Buell<sup>\*\*</sup>, G. Craig Yencho<sup>†</sup> and Zhao-Bang Zeng<sup>\*,†</sup>

<sup>\*</sup>Bioinformatics Research Center, North Carolina State University, Raleigh NC 27695, USA, <sup>†</sup>Department of Horticultural Science, North Carolina State University, Raleigh NC 27695, USA, <sup>§</sup>International Potato Center, ILRI Campus, Nairobi 25171-00603, Kenya, <sup>‡</sup>Department of Entomology and Plant Pathology, University of Tennessee, Knoxville TN 37996, USA, <sup>\*\*</sup>Department of Plant Biology, Michigan State University, East Lansing, MI 48824, USA, <sup>††</sup>International Potato Center, Lima 1558, Peru, <sup>§§</sup>Plant Pathology and Plant-Microbe Biology Section, Cornell University, Geneva NY 14456, USA

---

## Supplemental Tables

---

---

<sup>1</sup>These authors contributed equally to this work.

<sup>2</sup>Corresponding author: North Carolina State University, 1 Lampe Dr, Raleigh, NC 27695-7566. E-mail: gdasilv@ncsu.edu

**Table S1** Proportion of mapped QTL paired to simulated positions (<20 cM, in percentage) and precision (absolute difference between simulated and mapped QTL peak position, on average, in centiMorgans) from 1,000 simulated quantitative traits with three QTLs with different heritabilities ( $h_q^2 = \{0.27, 0.18, 0.09\}$ ) for three difference scenarios. Fixed-effect interval mapping (FEIM) and random-effect multiple interval mapping (REMIM) were carried out with and without the simulated error, under different genome-wide significance  $\alpha$  level thresholds in 'Beauregard'  $\times$  'Tanzania' (BT) full-sib population genetic map

| Scenario | $\alpha$ | $h_q^2$ | With error |           |        |           | Without error |           |        |           |
|----------|----------|---------|------------|-----------|--------|-----------|---------------|-----------|--------|-----------|
|          |          |         | FEIM       |           | REMIM  |           | FEIM          |           | REMIM  |           |
|          |          |         | Paired     | Precision | Paired | Precision | Paired        | Precision | Paired | Precision |
| Unlinked | 0.20     | 0.3     | 95.20      | 2.32      | 97.20  | 2.62      | 99.90         | 0.55      | 100.00 | 0.77      |
|          |          | 0.2     | 86.10      | 3.36      | 90.80  | 3.24      | 99.30         | 1.30      | 100.00 | 0.77      |
|          |          | 0.1     | 48.70      | 4.76      | 67.60  | 4.57      | 88.30         | 3.04      | 100.00 | 0.56      |
|          | 0.15     | 0.3     | 94.80      | 2.30      | 97.20  | 2.55      | 99.90         | 0.55      | 99.90  | 0.62      |
|          |          | 0.2     | 84.50      | 3.34      | 89.80  | 3.03      | 99.20         | 1.30      | 99.90  | 0.52      |
|          |          | 0.1     | 46.40      | 4.68      | 65.80  | 4.50      | 87.10         | 3.00      | 99.90  | 0.49      |
|          | 0.10     | 0.3     | 94.40      | 2.31      | 97.00  | 2.54      | 99.90         | 0.55      | 99.90  | 0.60      |
|          |          | 0.2     | 82.50      | 3.31      | 89.10  | 3.01      | 99.00         | 1.30      | 99.90  | 0.53      |
|          |          | 0.1     | 41.70      | 4.57      | 64.10  | 4.45      | 86.30         | 2.99      | 99.90  | 0.49      |
|          | 0.05     | 0.3     | 93.50      | 2.27      | 96.50  | 2.53      | 99.90         | 0.55      | 99.90  | 0.60      |
|          |          | 0.2     | 80.00      | 3.25      | 88.10  | 3.01      | 98.80         | 1.28      | 99.90  | 0.52      |
|          |          | 0.1     | 38.80      | 4.44      | 60.20  | 4.34      | 85.20         | 2.97      | 100.00 | 0.48      |
|          | 0.01     | 0.3     | 91.60      | 2.21      | 94.50  | 2.43      | 99.80         | 0.55      | 99.90  | 0.59      |
|          |          | 0.2     | 75.10      | 3.18      | 83.40  | 2.93      | 98.20         | 1.26      | 99.90  | 0.51      |
|          |          | 0.1     | 28.40      | 4.30      | 49.00  | 4.13      | 81.40         | 2.86      | 99.90  | 0.48      |
| Random   | 0.20     | 0.3     | 93.80      | 2.24      | 94.80  | 2.60      | 98.70         | 0.49      | 100.00 | 0.76      |
|          |          | 0.2     | 83.10      | 3.36      | 89.70  | 3.28      | 94.40         | 1.33      | 100.00 | 0.83      |
|          |          | 0.1     | 43.90      | 4.73      | 60.00  | 4.32      | 79.80         | 2.83      | 100.00 | 0.51      |
|          | 0.15     | 0.3     | 93.50      | 2.21      | 94.80  | 2.39      | 98.80         | 0.49      | 99.90  | 0.47      |
|          |          | 0.2     | 81.80      | 3.34      | 89.30  | 3.20      | 94.40         | 1.33      | 100.00 | 0.60      |
|          |          | 0.1     | 41.90      | 4.79      | 58.60  | 4.32      | 79.30         | 2.81      | 100.00 | 0.47      |
|          | 0.10     | 0.3     | 93.00      | 2.19      | 94.40  | 2.34      | 98.80         | 0.49      | 99.90  | 0.46      |
|          |          | 0.2     | 79.80      | 3.31      | 88.30  | 3.18      | 94.20         | 1.31      | 100.00 | 0.58      |
|          |          | 0.1     | 38.70      | 4.69      | 57.10  | 4.22      | 78.50         | 2.76      | 100.00 | 0.48      |
|          | 0.05     | 0.3     | 92.20      | 2.18      | 93.80  | 2.32      | 98.80         | 0.49      | 99.90  | 0.46      |
|          |          | 0.2     | 78.40      | 3.23      | 87.30  | 3.15      | 94.20         | 1.31      | 100.00 | 0.57      |
|          |          | 0.1     | 36.20      | 4.66      | 54.20  | 4.15      | 77.20         | 2.75      | 99.90  | 0.47      |
|          | 0.01     | 0.3     | 89.20      | 2.15      | 91.40  | 2.26      | 98.70         | 0.49      | 99.90  | 0.45      |
|          |          | 0.2     | 72.80      | 3.13      | 83.90  | 3.06      | 94.10         | 1.32      | 100.00 | 0.55      |
|          |          | 0.1     | 27.10      | 4.57      | 43.50  | 4.16      | 72.40         | 2.56      | 99.90  | 0.47      |
| Linked   | 0.20     | 0.3     | 87.80      | 2.45      | 94.50  | 2.86      | 90.10         | 0.60      | 100.00 | 0.82      |
|          |          | 0.2     | 67.90      | 3.09      | 89.10  | 3.19      | 70.60         | 1.06      | 100.00 | 0.86      |
|          |          | 0.1     | 36.30      | 4.66      | 61.60  | 4.35      | 45.50         | 2.87      | 100.00 | 0.60      |
|          | 0.15     | 0.3     | 87.60      | 2.43      | 94.70  | 2.49      | 90.10         | 0.60      | 100.00 | 0.51      |
|          |          | 0.2     | 67.20      | 3.08      | 89.00  | 3.07      | 70.70         | 1.06      | 99.70  | 0.57      |
|          |          | 0.1     | 34.70      | 4.63      | 60.50  | 4.10      | 45.60         | 2.88      | 100.00 | 0.54      |
|          | 0.10     | 0.3     | 87.70      | 2.44      | 94.40  | 2.52      | 90.10         | 0.60      | 100.00 | 0.50      |
|          |          | 0.2     | 67.70      | 3.07      | 88.30  | 2.99      | 70.80         | 1.06      | 99.60  | 0.55      |
|          |          | 0.1     | 33.40      | 4.44      | 58.80  | 4.09      | 45.50         | 2.85      | 100.00 | 0.55      |
|          | 0.05     | 0.3     | 86.80      | 2.40      | 93.90  | 2.49      | 90.20         | 0.60      | 100.00 | 0.50      |
|          |          | 0.2     | 66.50      | 3.09      | 86.80  | 3.00      | 71.30         | 1.07      | 99.70  | 0.54      |
|          |          | 0.1     | 28.90      | 4.32      | 55.30  | 4.06      | 45.80         | 2.72      | 100.00 | 0.55      |
|          | 0.01     | 0.3     | 85.60      | 2.37      | 92.30  | 2.46      | 90.10         | 0.58      | 100.00 | 0.49      |
|          |          | 0.2     | 62.50      | 2.96      | 82.00  | 2.91      | 71.60         | 1.07      | 99.70  | 0.53      |
|          |          | 0.1     | 24.90      | 4.43      | 45.30  | 3.97      | 44.20         | 2.71      | 100.00 | 0.54      |

**Table S2** Detection power, empirical false discovery rate (FDR) and coverage (all in percentage) relative to support intervals calculated for each  $d = \{1.0, 1.5, 2.0\}$  from 1,000 simulated quantitative traits for three different scenarios. Fixed-effect interval mapping (FEIM) and random-effect multiple interval mapping (REMIM) were carried out with and without the simulated error, under different genome-wide significance  $\alpha$  level thresholds in 'Beauregard'  $\times$  'Tanzania' (BT) full-sib population genetic map

| Scenario | $\alpha$ | $d$  | With error |      |          |       |      |          | Without error |      |          |       |       |          |       |
|----------|----------|------|------------|------|----------|-------|------|----------|---------------|------|----------|-------|-------|----------|-------|
|          |          |      | FEIM       |      |          | REMIM |      |          | FEIM          |      |          | REMIM |       |          |       |
|          |          |      | Power      | FDR  | Coverage | Power | FDR  | Coverage | Power         | FDR  | Coverage | Power | FDR   | Coverage |       |
| Unlinked | 0.20     | 1.0  | 65.3       | 23.5 | 85.2     | 79.7  | 15.2 | 93.5     | 88.5          | 14.0 | 92.3     | 99.7  | 8.1   | 99.7     |       |
|          |          | 1.5  | 72.1       | 15.4 | 94.0     | 82.7  | 12.1 | 97.0     | 93.2          | 9.5  | 97.3     | 99.8  | 8.1   | 99.8     |       |
|          |          | 2.0  | 75.0       | 12.0 | 97.8     | 83.9  | 10.8 | 98.5     | 94.9          | 7.9  | 99.1     | 99.8  | 8.1   | 99.8     |       |
|          | 0.15     | 1.0  | 64.1       | 21.6 | 85.2     | 78.0  | 14.7 | 92.6     | 88.1          | 12.5 | 92.4     | 99.9  | 5.3   | 100.0    |       |
|          |          | 1.5  | 70.8       | 13.3 | 94.2     | 80.9  | 11.5 | 96.0     | 92.8          | 7.9  | 97.3     | 99.9  | 5.3   | 100.0    |       |
|          |          | 2.0  | 73.7       | 9.8  | 98.0     | 82.1  | 10.4 | 97.4     | 94.5          | 6.3  | 99.1     | 99.9  | 5.3   | 100.0    |       |
|          | 0.10     | 1.0  | 62.2       | 20.0 | 85.4     | 77.1  | 13.5 | 92.5     | 87.8          | 11.1 | 92.4     | 99.9  | 4.8   | 100.0    |       |
|          |          | 1.5  | 68.7       | 11.6 | 94.3     | 80.0  | 10.3 | 95.9     | 92.5          | 6.6  | 97.3     | 99.9  | 4.8   | 100.0    |       |
|          |          | 2.0  | 71.4       | 8.2  | 98.0     | 81.1  | 9.1  | 97.3     | 94.2          | 4.9  | 99.1     | 99.9  | 4.8   | 100.0    |       |
|          | 0.05     | 1.0  | 60.4       | 18.8 | 85.3     | 75.5  | 12.3 | 92.5     | 87.4          | 10.1 | 92.4     | 99.9  | 4.2   | 100.0    |       |
|          |          | 1.5  | 66.7       | 10.3 | 94.3     | 78.5  | 9.0  | 96.2     | 92.0          | 5.5  | 97.3     | 99.9  | 4.2   | 100.0    |       |
|          |          | 2.0  | 69.3       | 6.9  | 98.0     | 79.4  | 7.9  | 97.3     | 93.7          | 3.8  | 99.1     | 99.9  | 4.2   | 100.0    |       |
|          | 0.01     | 1.0  | 55.5       | 16.7 | 85.4     | 70.2  | 9.6  | 92.8     | 86.1          | 8.7  | 92.4     | 99.9  | 3.5   | 100.0    |       |
|          |          | 1.5  | 61.3       | 8.2  | 94.2     | 72.8  | 6.4  | 96.3     | 90.6          | 4.1  | 97.3     | 99.9  | 3.5   | 100.0    |       |
|          |          | 2.0  | 63.7       | 4.6  | 98.0     | 73.5  | 5.4  | 97.2     | 92.3          | 2.4  | 99.1     | 99.9  | 3.5   | 100.0    |       |
|          | Random   | 0.20 | 1.0        | 64.2 | 23.6     | 87.3  | 76.4 | 14.7     | 93.7          | 84.2 | 16.1     | 92.6  | 99.5  | 7.4      | 99.5  |
|          |          |      | 1.5        | 69.8 | 17.0     | 94.8  | 79.2 | 11.7     | 97.2          | 88.1 | 12.4     | 96.9  | 99.7  | 7.3      | 99.7  |
|          |          |      | 2.0        | 72.2 | 14.1     | 98.1  | 80.3 | 10.5     | 98.5          | 89.8 | 10.7     | 98.7  | 99.7  | 7.3      | 99.7  |
|          |          | 0.15 | 1.0        | 63.1 | 21.8     | 87.2  | 74.7 | 14.7     | 92.3          | 84.0 | 14.6     | 92.5  | 100.0 | 4.0      | 100.0 |
|          |          |      | 1.5        | 68.6 | 15.1     | 94.7  | 77.8 | 11.4     | 96.2          | 88.0 | 10.8     | 96.8  | 100.0 | 4.0      | 100.0 |
|          |          |      | 2.0        | 71.0 | 12.1     | 98.1  | 78.7 | 10.4     | 97.3          | 89.7 | 9.1      | 98.7  | 100.0 | 4.0      | 100.0 |
|          |          | 0.10 | 1.0        | 61.7 | 19.8     | 87.5  | 73.9 | 13.9     | 92.4          | 83.8 | 12.7     | 92.6  | 100.0 | 3.5      | 100.0 |
|          |          |      | 1.5        | 66.9 | 13.3     | 94.9  | 76.8 | 10.6     | 96.1          | 87.7 | 8.8      | 96.9  | 100.0 | 3.5      | 100.0 |
|          |          |      | 2.0        | 69.2 | 10.3     | 98.1  | 77.7 | 9.6      | 97.3          | 89.4 | 7.0      | 98.8  | 100.0 | 3.5      | 100.0 |
| 0.05     |          | 1.0  | 60.2       | 18.3 | 87.4     | 72.4  | 12.5 | 92.3     | 83.4          | 11.4 | 92.6     | 99.9  | 3.2   | 100.0    |       |
|          |          | 1.5  | 65.4       | 11.6 | 94.8     | 75.4  | 9.1  | 96.1     | 87.3          | 7.4  | 96.9     | 99.9  | 3.2   | 100.0    |       |
|          |          | 2.0  | 67.7       | 8.6  | 98.2     | 76.3  | 8.0  | 97.3     | 88.9          | 5.7  | 98.7     | 99.9  | 3.2   | 100.0    |       |
| 0.01     |          | 1.0  | 55.3       | 15.7 | 87.7     | 67.7  | 10.3 | 92.8     | 82.1          | 9.3  | 92.9     | 99.9  | 2.8   | 100.0    |       |
|          |          | 1.5  | 59.9       | 9.2  | 95.0     | 70.3  | 6.9  | 96.3     | 85.7          | 5.6  | 96.9     | 99.9  | 2.8   | 100.0    |       |
|          |          | 2.0  | 61.9       | 6.3  | 98.1     | 71.1  | 5.9  | 97.4     | 87.3          | 3.9  | 98.8     | 99.9  | 2.8   | 100.0    |       |
| Linked   |          | 0.20 | 1.0        | 55.4 | 23.2     | 86.5  | 76.2 | 15.0     | 93.2          | 64.0 | 16.0     | 93.2  | 99.8  | 7.9      | 99.8  |
|          |          |      | 1.5        | 60.1 | 16.7     | 93.9  | 79.1 | 11.9     | 96.7          | 66.9 | 12.4     | 97.3  | 99.9  | 7.9      | 99.9  |
|          |          |      | 2.0        | 62.4 | 13.6     | 97.5  | 79.8 | 11.1     | 97.7          | 67.9 | 11.0     | 98.8  | 99.9  | 7.9      | 99.9  |
|          |          | 0.15 | 1.0        | 54.6 | 21.5     | 86.5  | 75.4 | 14.1     | 92.6          | 64.0 | 14.5     | 93.0  | 99.9  | 4.9      | 100.0 |
|          |          |      | 1.5        | 59.3 | 14.7     | 93.9  | 78.5 | 10.7     | 96.4          | 66.9 | 10.6     | 97.2  | 99.9  | 4.9      | 100.0 |
|          |          |      | 2.0        | 61.5 | 11.6     | 97.4  | 79.2 | 9.9      | 97.3          | 68.0 | 9.1      | 98.8  | 99.9  | 4.9      | 100.0 |
|          |          | 0.10 | 1.0        | 54.5 | 20.4     | 86.6  | 74.1 | 13.5     | 92.1          | 64.0 | 12.9     | 93.0  | 99.9  | 4.4      | 100.0 |
|          |          |      | 1.5        | 59.2 | 13.5     | 94.0  | 77.2 | 10.0     | 95.9          | 66.9 | 8.9      | 97.2  | 99.9  | 4.4      | 100.0 |
|          |          |      | 2.0        | 61.3 | 10.4     | 97.4  | 78.0 | 9.1      | 96.9          | 68.0 | 7.4      | 98.8  | 99.9  | 4.4      | 100.0 |
|          | 0.05     | 1.0  | 52.9       | 17.9 | 87.2     | 72.5  | 12.1 | 92.1     | 64.3          | 10.1 | 93.1     | 99.9  | 3.9   | 100.0    |       |
|          |          | 1.5  | 57.3       | 10.9 | 94.4     | 75.3  | 8.8  | 95.8     | 67.2          | 6.1  | 97.3     | 99.9  | 3.9   | 100.0    |       |
|          |          | 2.0  | 59.2       | 8.1  | 97.5     | 76.2  | 7.8  | 96.8     | 68.3          | 4.6  | 98.9     | 99.9  | 3.9   | 100.0    |       |
|          | 0.01     | 1.0  | 50.4       | 16.6 | 87.3     | 67.4  | 10.7 | 92.1     | 63.8          | 8.3  | 93.0     | 99.9  | 3.4   | 100.0    |       |
|          |          | 1.5  | 54.4       | 9.7  | 94.3     | 70.0  | 7.4  | 95.6     | 66.7          | 4.4  | 97.2     | 99.9  | 3.4   | 100.0    |       |
|          |          | 2.0  | 56.1       | 6.8  | 97.3     | 70.7  | 6.5  | 96.6     | 67.8          | 2.9  | 98.8     | 99.9  | 3.4   | 100.0    |       |

**Table S3** Summary of fixed-effect interval mapping (FEIM) for eight yield-related traits in ‘Beauregard’ × ‘Tanzania’ (BT) full-sib family. Linkage group (LG), map position (in centiMorgans) and its ~95% support interval (within parenthesis), likelihood-ratio test (LRT), its corresponding logarithm of the odds (LOD) and the adjusted  $R^2$  ( $R^2_{adj}$ , in percentage) are shown for each mapped QTL using permutation-based genome-wide significance LOD threshold of 0.05.

| Trait <sup>a</sup> | QTL | LG | Position (cM)          | LRT   | LOD   | $R^2_{adj}$ (%) |
|--------------------|-----|----|------------------------|-------|-------|-----------------|
| NOCR               | 1   | 1  | 144.57 (100.30-154.00) | 42.67 | 9.27  | 10.32           |
|                    | 2   | 3  | 20.18 (16.60-45.54)    | 45.04 | 9.78  | 11.03           |
| NONC               | 1   | 3  | 32.56 (4.68-50.15)     | 38.27 | 8.31  | 8.99            |
|                    | 2   | 10 | 111.40 (97.02-151.19)  | 38.87 | 8.44  | 9.17            |
|                    | 3   | 15 | 56.86 (40.40-78.04)    | 47.78 | 10.37 | 11.85           |
|                    | 4   | 15 | 119.08 (88.03-120.03)  | 39.03 | 8.48  | 9.22            |
| TNR                | 1   | 1  | 143.01 (130.55-156.18) | 46.72 | 10.15 | 11.53           |
|                    | 2   | 3  | 32.56 (18.43-44.03)    | 49.77 | 10.81 | 12.43           |
|                    | 3   | 15 | 77.15 (41.12-127.15)   | 40.06 | 8.70  | 9.53            |
| CYTHA              | 1   | 15 | 5.34 (0.00-38.38)      | 42.56 | 9.24  | 10.29           |
| RYTHA              | 1   | 15 | 5.34 (0.00-38.38)      | 40.56 | 8.81  | 9.68            |
| FYTHA              | 1   | 10 | 25.11 (16.12-133.55)   | 36.42 | 7.91  | 8.42            |

<sup>a</sup> Trait abbreviations: number of commercial (NOCR), noncommercial (NONC) and total (TNR) roots per plant, commercial (CYTHA), noncommercial (NCYTHA) and total (RYTHA) root yield in  $t \cdot ha^{-1}$ , foliage yield (FYTHA) in  $t \cdot ha^{-1}$ , and commercial index (CI).

**Table S4** Additive allele effects from QTL mapped for eight yield-related traits in ‘Beauregard’ × ‘Tanzania’ (BT) full-sib family using random-effect multiple interval mapping (REMIM). ‘Beauregard’ ( $\{a, \dots, f\}$ ) and ‘Tanzania’ ( $\{g, \dots, l\}$ ) alleles represent the parental contribution to the trait mean.

| Trait <sup>a</sup> | QTL | ‘Beauregard’ |          |          |          |          |          | ‘Tanzania’ |          |          |          |          |          |
|--------------------|-----|--------------|----------|----------|----------|----------|----------|------------|----------|----------|----------|----------|----------|
|                    |     | <i>a</i>     | <i>b</i> | <i>c</i> | <i>d</i> | <i>e</i> | <i>f</i> | <i>g</i>   | <i>h</i> | <i>i</i> | <i>j</i> | <i>k</i> | <i>l</i> |
| NOCR               | 1   | -0.0565      | 0.0901   | -0.0388  | -0.0040  | 0.0299   | -0.0206  | -0.0142    | 0.0232   | -0.0010  | 0.0603   | -0.0931  | 0.0248   |
|                    | 2   | 0.0048       | -0.0094  | -0.0975  | 0.0910   | -0.0273  | 0.0385   | -0.1370    | 0.0194   | 0.0032   | 0.0807   | 0.0112   | 0.0225   |
| NONC               | 1   | -0.0543      | 0.0290   | 0.0211   | -0.0032  | 0.0321   | -0.0247  | -0.0133    | 0.0335   | -0.0171  | 0.0783   | -0.0753  | -0.0061  |
|                    | 2   | 0.0450       | -0.0180  | -0.0629  | 0.0391   | -0.0258  | 0.0226   | -0.0281    | 0.0040   | -0.0281  | 0.0229   | -0.0347  | 0.0639   |
|                    | 3   | -0.0146      | 0.0029   | -0.0379  | -0.0564  | 0.0135   | 0.0926   | -0.0539    | -0.0130  | 0.0385   | 0.0480   | 0.0605   | -0.0800  |
|                    | 4   | -0.0662      | 0.0031   | 0.0362   | -0.0281  | -0.0185  | 0.0734   | -0.0206    | 0.1195   | -0.0135  | -0.0065  | -0.0172  | -0.0618  |
| TNR                | 1   | -0.1080      | 0.1184   | 0.0059   | -0.0141  | 0.0619   | -0.0642  | -0.0378    | 0.0566   | -0.0330  | 0.1181   | -0.1579  | 0.0540   |
|                    | 2   | 0.0870       | -0.0300  | -0.2240  | 0.1565   | -0.0573  | 0.0678   | -0.2291    | 0.0203   | -0.0305  | 0.1474   | -0.0124  | 0.1042   |
|                    | 3   | 0.0840       | -0.0036  | 0.0037   | -0.1326  | 0.0034   | 0.0451   | -0.0996    | 0.0697   | 0.0308   | 0.0242   | 0.0875   | -0.1126  |
|                    | 4   | -0.0888      | 0.1187   | 0.0071   | -0.0364  | -0.0838  | 0.0832   | -0.1121    | 0.2083   | 0.0327   | -0.0207  | -0.0621  | -0.0461  |
| CYTHA              | 1   | 0.3436       | 0.7652   | -0.6404  | -0.1211  | -0.1671  | -0.1803  | 0.0551     | 0.2210   | 1.0067   | -0.3285  | -0.4530  | -0.5013  |
| RYTHA              | 1   | 0.3217       | 0.8136   | -0.6961  | -0.1137  | -0.2138  | -0.1117  | 0.0492     | 0.3144   | 0.9903   | -0.3734  | -0.3922  | -0.5882  |
| FYTHA              | 1   | -0.2765      | -0.1241  | 0.2158   | 0.0181   | -0.0849  | 0.2517   | -0.1770    | -0.6752  | 0.2976   | 0.1144   | 0.2364   | 0.2039   |

<sup>a</sup> Trait abbreviations: number of commercial (NOCR), noncommercial (NONC) and total (TNR) roots per plant, commercial (CYTHA), noncommercial (NCYTHA) and total (RYTHA) root yield in  $t \cdot ha^{-1}$ , foliage yield (FYTHA) in  $t \cdot ha^{-1}$ , and commercial index (CI).

**Table S5** Map (in centiMorgans) and genome (in base pairs) positions and support intervals (inside the parentheses) for QTL mapped in 'Beauregard' × 'Tanzania' full-sib family using random-effect multiple interval mapping (REMIM) for eight yield-related traits.

| Trait <sup>a</sup> | QTL | LG | Map position (cM)      | <i>I. trifida</i> genome (bp) | <i>I. triloba</i> genome (bp) |
|--------------------|-----|----|------------------------|-------------------------------|-------------------------------|
| NOCR               | 1   | 1  | 137.60 (99.43-152.87)  | 21766797 (15917835-23289854)  | 26312289 (10387174-28126436)  |
|                    | 2   | 3  | 20.18 (0.00-49.27)     | 1591872 (32030-3664896)       | 1802096 (22131-4090763)       |
| NONC               | 1   | 1  | 142.07 (128.08-159.30) | 22334649 (20332569-24033209)  | 26960935 (6568909-29323516)   |
|                    | 2   | 3  | 13.11 (0.00-51.33)     | 806480 (32030-3972955)        | 917422 (22131-4646213)        |
|                    | 3   | 10 | 102.26 (96.50-113.55)  | 18827245 (18241193-19647452)  | 22932891 (22254345-23849899)  |
|                    | 4   | 15 | 67.20 (39.10-78.04)    | 4437217 (2225465-5613152)     | 4956558 (2534197-6405520)     |
| TNR                | 1   | 1  | 140.43 (128.08-152.87) | 22187065 (20332569-23289854)  | 26810127 (6568909-28126436)   |
|                    | 2   | 3  | 20.18 (13.11-43.69)    | 1591872 (806480-3417617)      | 1802096 (917422-3825133)      |
|                    | 3   | 10 | 165.43 (102.26-187.27) | 23304855 (18827245-24516154)  | 27542198 (22932891-28845769)  |
|                    | 4   | 15 | 78.04 (35.50-119.08)   | 5613152 (1976149-17701006)    | 6405520 (2282565-21381416)    |
| CYTHA              | 1   | 15 | 5.34 (0.00-34.27)      | 477772 (21822-1915814)        | 570552 (56000-2213276)        |
| RYTHA              | 1   | 15 | 5.34 (0.00-35.50)      | 477772 (21822-1976149)        | 570552 (56000-2282565)        |
| FYTHA              | 1   | 10 | 29.09 (16.12-134.37)   | 2508929 (1518491-21555353)    | 2930617 (1398004-25560274)    |

<sup>a</sup> Trait abbreviations: number of commercial (NOCR), noncommercial (NONC) and total (TNR) roots per plant, commercial (CYTHA), noncommercial (NCYTHA) and total (RYTHA) root yield in t · ha<sup>-1</sup>, foliage yield (FYTHA) in t · ha<sup>-1</sup>, and commercial index (CI).
